# Supplementary material for: Rab7-dependent regulation of goblet cell protein CLCA1 modulates gastrointestinal homeostasis
Source: eLife journal article supplement (doi:10.7554/elife.89776), 2023-11-01
Supplement: fig1-data1 [file elife-89776-fig1-data1-v1.zip]

**anti-Rab7**

100% 50% 25% 12.5%

100% 50% 25% 12.5%

**anti-actin**

100% 50% 25% 12.5%

100% 50% 25% 12.5%
