# Supplementary material for: Rab7-dependent regulation of goblet cell protein CLCA1 modulates gastrointestinal homeostasis
Source: eLife journal article supplement (doi:10.7554/elife.89776), 2023-11-01
Supplement: fig1-data1 [file Figure 1- source data legends.docx]

**Figure 1- source data 1.1:** Original file for the western blot in Figure 1A (anti-Rab7)

**Figure 1- source data 1.2:** Original file for the western blot in Figure 1A (anti-actin)

**Figure 1- source data 1:** Western blots labelled with relevant bands analyzed in Figure 1A (anti-Rab7 and anti-actin)

**Figure 1- source data 2.1:** Original file for the western blot in Figure 1B (anti-Rab7)

**Figure 1- source data 2.2:** Original file for the western blot in Figure 1B (anti-actin)

**Figure 1- source data 2:** Western blots labelled with relevant bands analyzed in Figure 1B (anti-Rab7 and anti-actin)

**Figure 1- source data 3.1:** Original file for the western blot in Figure 1D (anti-Rab7)

**Figure 1- source data 3.2:** Original file for the western blot in Figure 1D (anti-GAPDH)

**Figure 1- source data 3:** Western blots labelled with relevant bands analyzed in Figure 1D (anti-Rab7 and anti-GAPDH)

**Figure 1- source data 4.1:** Original file for the western blot in Figure 1F (anti-Rab7)

**Figure 1- source data 4.2:** Original file for the western blot in Figure 1F (anti-GAPDH)

**Figure 1- source data 4:** Western blots labelled with relevant bands analyzed 1F (anti-Rab7 and anti-GAPDH)
