# Supplementary material for: Rab7-dependent regulation of goblet cell protein CLCA1 modulates gastrointestinal homeostasis
Source: eLife journal article supplement (doi:10.7554/elife.89776), 2023-11-01
Supplement: fig1-figsupp1-data1 [file elife-89776-fig1-figsupp1-data1-v1.zip]

**Figure 1- figure supplement 1-source data 1.1:** Original file for the western blot in Figure 1- figure supplement 1F (anti-Rab7)

**Figure 1- figure supplement 1-source data 1.2:** Original file for the western blot in Figure 1- figure supplement 1F (anti-actin)

**Figure 1- figure supplement 1-source data 1.3:** Original file for the western blot in Figure 1- figure supplement 1F (anti-Rab7)

**Figure 1- figure supplement 1-source data 1.4:** Original file for the western blot in Figure 1- figure supplement 1F (anti-actin)

**Figure 1- figure supplement 1-source data 1:** Western blots labelled with relevant bands analyzed in Figure 1- figure supplement 1F (anti-Rab7 and anti-actin)

**Figure 1- figure supplement 1-source data 2.1:** Original file for the western blot in Figure 1- figure supplement 1H (anti-Rab7)

**Figure 1- figure supplement 1-source data 2.2:** Original file for the western blot in Figure 1- figure supplement 1H (anti-GAPDH)

**Figure 1- figure supplement 1-source data 2:** Western blots labelled with relevant bands analyzed in Figure 1- figure supplement 1H (anti-Rab7 and anti-GAPDH)

**Figure 1- figure supplement 1-source data 3.1:** Original file for the western blot in Figure 1- figure supplement 1I (anti-Rab7)

**Figure 1- figure supplement 1-source data 3.2:** Original file for the western blot in Figure 1- figure supplement 1I (anti-GAPDH)

**Figure 1- figure supplement 1-source data 3:** Western blots labelled with relevant bands analyzed in Figure 1- figure supplement 1I (anti-Rab7 and anti-GAPDH)
