# Supplementary material for: Rab7-dependent regulation of goblet cell protein CLCA1 modulates gastrointestinal homeostasis
Source: eLife journal article supplement (doi:10.7554/elife.89776), 2023-11-01
Supplement: fig3-data1 [file Figure 3- source data legends.docx]

**Figure 3- source data 1.1:** Original file for the western blot in Figure 3F(anti-Rab7)

**Figure 3- source data 1.2:** Original file for the western blot in Figure 3F (anti-actin)

**Figure 3- source data 1:** Western blots labelled with relevant bands analyzed in Figure 3F (anti-Rab7 and anti-actin)
