# Supplementary material for: Rab7-dependent regulation of goblet cell protein CLCA1 modulates gastrointestinal homeostasis
Source: eLife journal article supplement (doi:10.7554/elife.89776), 2023-11-01
Supplement: fig7-data1 [file Figure 7- source data legends.docx]

**Figure 7- source data 1.1:** Original file for the western blot in Figure 7A (anti-CLCA1)

**Figure 7- source data 1:** Western blots labelled with relevant bands analyzed in Figure 7A (anti-CLCA1)

**Figure 7- source data 2.1:** Original file for the western blot in Figure 7C (anti-CLCA1)

**Figure 7- source data 2.2:** Original file for the western blot in Figure 7C (anti-CLCA1)

**Figure 7- source data 2:** Western blots labelled with relevant bands analyzed in Figure 7C (anti-CLCA1)

**Figure 7- source data 3.1:** Original file for the western blot in Figure 7F (anti-CLCA1)

**Figure 7- source data 3.2:** Original file for the western blot in Figure 7F (anti-actin)

**Figure 7- source data 3:** Western blots labelled with relevant bands analyzed in Figure 7F (anti-CLCA1 and anti-actin)

**Figure 7- source data 4.1:** Original file for the western blot in Figure 7G (anti-CLCA1)

**Figure 7- source data 4.2:** Original file for the western blot in Figure 7G (anti-actin)

**Figure 7- source data 4:** Western blots labelled with relevant bands analyzed in Figure 7G (anti-CLCA1 and anti-actin)

**Figure 7- source data 5.1:** Original file for the western blot in Figure 7H (anti-CLCA1)

**Figure 7- source data 5.2:** Original file for the western blot in Figure 7H (anti-actin)

**Figure 7- source data 5:** Western blots labelled with relevant bands analyzed in Figure 7H (anti-CLCA1 and anti-actin)
