# Supplementary material for: Rab7-dependent regulation of goblet cell protein CLCA1 modulates gastrointestinal homeostasis
Source: eLife. 2024 Apr 9;12:RP89776. doi: 10.7554/eLife.89776 (PMC11003743; doi:10.7554/eLife.89776)
Supplement: Figure 1—source data 1. [file elife-89776-fig1-data1.zip]

Archive with 13 entries (13 files):
- Figure 1- source data 1.1.tif
- Figure 1- source data 1.2.tif
- Figure 1- source data 1.pdf
- Figure 1- source data 2.1.tif
- Figure 1- source data 2.2.tif
- Figure 1- source data 2.pdf
- Figure 1- source data 3.1.tif
- Figure 1- source data 3.2.tif
- Figure 1- source data 3.pdf
- Figure 1- source data 4.1.tif
- Figure 1- source data 4.2.tif
- Figure 1- source data 4.pdf
- Figure 1- source data legends.docx
