# Supplementary material for: Rab7-dependent regulation of goblet cell protein CLCA1 modulates gastrointestinal homeostasis
Source: eLife. 2024 Apr 9;12:RP89776. doi: 10.7554/eLife.89776 (PMC11003743; doi:10.7554/eLife.89776)
Supplement: Figure 5—source data 1. [file elife-89776-fig5-data1.xlsx]

## Sheet: Phylum
	DSS+Scr siRNA	Rab7 siRNA	Scr siRNA
p__Actinobacteria	1.60461	1.62299	1.55926
p__Bacteroidetes	37.8382	48.4475	31.951
p__Cyanobacteria	0.221313	0.0244015	0.013787
p__Deferribacteres	0.190384	0.00373123	0.141505
p__Firmicutes	36.1811	47.0098	60.9074
p__OD1	0	0.000355139	0
p__Proteobacteria	7.29281	2.25462	4.54524
p__Tenericutes	0.126209	0.0305041	0.0185299
p__TM7	0.13243	0.0451031	0.251617
p__Verrucomicrobia	15.3	0.00383381	0.061054
unclassified	1.11295	0.557179	0.550628

## Sheet: Class
	DSS+Scr siRNA	Rab7 siRNA	Scr siRNA
c__4C0d-2	0.221313	0.0244015	0.0133009
c__Actinobacteria	1.24485	0.956346	0.966568
c__Alphaproteobacteria	0.667857	0.01317	0.00922023
c__Bacilli	13.9624	34.4774	31.5842
c__Bacteroidia	35.3998	47.4732	30.9827
c__Betaproteobacteria	1.04195	0.393061	0.407387
c__Chloroplast	0	0	0.000486157
c__Clostridia	15.3165	5.86693	22.3376
c__Coriobacteriia	0.358204	0.663027	0.58834
c__Deferribacteres	0.190384	0.00373123	0.141505
c__Deltaproteobacteria	0.391756	0.151492	1.58061
c__Epsilonproteobacteria	5.03808	1.69552	2.54569
c__Erysipelotrichi	6.74142	6.62438	6.90891
c__Flavobacteriia	0.00154868	0.00177569	0
c__Gammaproteobacteria	0.15316	0.00137724	0.000919921
c__Mollicutes	0.126209	0.0305041	0.0185299
c__Opitutae	0	0	0.000487102
c__Saprospirae	0	0.000355139	0
c__TM7-3	0.13243	0.0451031	0.251617
c__Verrucomicrobiae	15.3	0.00383381	0.0605669
c__ZB2	0	0.000355139	0
unclassified	3.71215	1.57405	1.60131

## Sheet: Order
	DSS+Scr siRNA	Rab7 siRNA	Scr siRNA
o__Actinomycetales	0.000516228	0	0.000486157
o__Aeromonadales	0	0	0.000919921
o__Bacillales	0.00373333	0.000562341	0.00140702
o__Bacteroidales	35.3998	47.4732	30.9827
o__Bifidobacteriales	1.24382	0.952615	0.965596
o__Burkholderiales	1.0182	0.383024	0.3993
o__Campylobacterales	5.03808	1.69552	2.54569
o__Clostridiales	15.3117	5.86001	22.3284
o__Coriobacteriales	0.358204	0.663027	0.58834
o__CW040	0.13243	0.0451031	0.251617
o__Deferribacterales	0.190384	0.00373123	0.141505
o__Desulfovibrionales	0.391756	0.151492	1.58061
o__Enterobacteriales	0.15046	0.000355139	0
o__Erysipelotrichales	6.74142	6.62438	6.90891
o__Flavobacteriales	0.00154868	0.00177569	0
o__Kiloniellales	0	0.000562341	0
o__Lactobacillales	8.56617	34.4584	29.8566
o__Methylococcales	0	0.000511051	0
o__Methylophilales	0	0.000511051	0
o__Mycoplasmatales	0.125812	0.0288683	0.0170714
o__Opitutales	0	0	0.000487102
o__Pseudomonadales	0.00178693	0	0
o__RF32	0.665712	0.00935214	0.00827317
o__RF39	0.000397725	0.00163573	0.00145847
o__Rhizobiales	0	0.00183496	0
o__Rhodobacterales	0.00154868	0.000710278	0
o__Rickettsiales	0	0	0.000947062
o__Saprospirales	0	0.000355139	0
o__Turicibacterales	5.37699	0	1.71056
o__Verrucomicrobiales	15.3	0.00383381	0.0605669
o__Vibrionales	0.000516228	0	0
o__Xanthomonadales	0.000397725	0.000511051	0
o__YS2	0.221313	0.0244015	0.0133009
unclassified	3.75723	1.61371	1.63525

## Sheet: Family
	DSS+Scr siRNA	Rab7 siRNA	Scr siRNA
f__Aeromonadaceae	0	0	0.000919921
f__Alcaligenaceae	1.01435	0.383024	0.398813
f__Bacillaceae	0.000516228	0	0
f__Bacteroidaceae	12.7478	2.9867	2.21043
f__Bifidobacteriaceae	1.24382	0.952615	0.965596
f__Christensenellaceae	0.0231583	0.00320423	0.0163235
f__Clostridiaceae	0	0.0234098	0
f__Comamonadaceae	0.00281938	0	0
f__Coriobacteriaceae	0.358204	0.663027	0.58834
f__Deferribacteraceae	0.190384	0.00373123	0.141505
f__Dehalobacteriaceae	0.0887439	0.029523	0.112739
f__Desulfovibrionaceae	0.298737	0.14563	1.53984
f__Enterobacteriaceae	0.15046	0.000355139	0
f__Enterococcaceae	0.011079	0	0.00275976
f__Erysipelotrichaceae	6.74142	6.62438	6.90891
f__Eubacteriaceae	0.00119128	0.00142056	0.00289452
f__F16	0.13243	0.0451031	0.251617
f__Flavobacteriaceae	0.00154868	0.00177569	0
f__Helicobacteraceae	5.03808	1.69552	2.54569
f__Hyphomicrobiaceae	0	0.00112468	0
f__Kiloniellaceae	0	0.000562341	0
f__Lachnospiraceae	9.75529	4.63466	19.9384
f__Lactobacillaceae	8.52502	34.4134	29.8328
f__Leuconostocaceae	0.00119318	0	0.00045996
f__Methylococcaceae	0	0.000511051	0
f__Methylophilaceae	0	0.000511051	0
f__Micrococcaceae	0.000516228	0	0.000486157
f__mitochondria	0	0	0.000947062
f__Mogibacteriaceae	0.0614849	0.0488812	0.230281
f__Moraxellaceae	0.00119128	0	0
f__Mycoplasmataceae	0.125812	0.0288683	0.0170714
f__Odoribacteraceae	0.658828	0.980357	1.58441
f__Opitutaceae	0	0	0.000487102
f__Paraprevotellaceae	4.58266	0.322348	0.550168
f__Peptostreptococcaceae	0.00409008	0	0
f__Porphyromonadaceae	1.43218	0.968175	0.849909
f__Prevotellaceae	0.849774	0.339562	0.667534
f__Pseudoalteromonadaceae	0.000516228	0	0
f__Pseudomonadaceae	0.000595642	0	0
f__Rhodobacteraceae	0.00154868	0.000710278	0
f__Rikenellaceae	1.20896	1.09797	1.22772
f__Ruminococcaceae	3.98299	1.02193	1.80038
f__S24-7	13.8915	40.7376	23.8605
f__Saprospiraceae	0	0.000355139	0
f__Staphylococcaceae	0.000397725	0.000562341	0
f__Streptococcaceae	0.0121115	0.00520307	0.000486157
f__Turicibacteraceae	5.37699	0	1.71056
f__Veillonellaceae	0	0	0.00189223
f__Verrucomicrobiaceae	15.3	0.00383381	0.0605669
f__Xanthomonadaceae	0.000397725	0.000511051	0
unclassified	6.18112	1.83294	1.9785

## Sheet: Genus
	DSS+Scr siRNA	Rab7 siRNA	Scr siRNA
g__Achromobacter	0	0	0.00045996
g__Acinetobacter	0.00119128	0	0
g__Adlercreutzia	0.270299	0.449341	0.411511
g__Aeromonas	0	0	0.000919921
g__AF12	0.0596552	0.0681225	0.177983
g__Akkermansia	15.2885	0.00383381	0.0605669
g__Alistipes	0.0148987	0.0259128	0.0315377
g__Allobaculum	5.76367	5.66547	5.78904
g__Anaerofustis	0.00119128	0.00142056	0.00289452
g__Anaerotruncus	0.00218654	0.00091748	0.00997636
g__Atopobium	0	0.000511051	0
g__Bacteroides	12.7478	2.9867	2.21043
g__Bifidobacterium	1.24331	0.95052	0.965109
g__Bilophila	0.00119318	0.00106542	0
g__Butyricicoccus	0.0144366	0.00663365	0.0146527
g__Candidatus_Arthromitus	0	0.0234098	0
g__cc_115	0.00369803	0.0964661	0.39249
g__Clostridium	6.36309	0.494068	4.48815
g__Comamonas	0.00230315	0	0
g__Coprobacillus	0.0115214	0.0558957	0.122774
g__Coprococcus	0.605817	0.506965	0.70777
g__Dehalobacterium	0.0887439	0.029523	0.112739
g__Desulfovibrio	0.297544	0.144565	1.53984
g__Dorea	0.081204	0.175811	0.826458
g__Enterobacter	0	0.000355139	0
g__Enterococcus	0.011079	0	0.00275976
g__Escherichia	0.147718	0	0
g__Faecalibacterium	0.000516228	0.00157647	0.00137988
g__Flexispira	0.253766	1.24786	0.711403
g__Gemmiger	0.00079545	0.000562341	0.00864604
g__Helicobacter	1.42968	0.294943	1.17694
g__Labrenzia	0	0.00112468	0
g__Lachnospira	0	0.000710278	0
g__Lactobacillus	8.51389	34.378	29.8061
g__Megasphaera	0	0	0.000946117
g__Micrococcus	0	0	0.000486157
g__Mucispirillum	0.190384	0.00373123	0.141505
g__Mycoplasma	0	0.000511051	0
g__Odoribacter	0.658828	0.980357	1.58441
g__Olsenella	0.0699061	0.192635	0.15681
g__Opitutus	0	0	0.000487102
g__Oscillospira	1.80278	0.609685	0.961082
g__Parabacteroides	1.42892	0.96588	0.847989
g__Paraprevotella	2.84496	0.0641478	0.148207
g__Pediococcus	0	0	0.000486157
g__Prevotella	2.58748	0.597762	1.06949
g__Pseudomonas	0.000595642	0	0
g__Roseburia	0	0.000710278	0
g__Rothia	0.000516228	0	0
g__Ruegeria	0	0.000710278	0
g__Ruminococcus	2.8891	1.06924	5.72316
g__Shigella	0.00143018	0	0
g__Staphylococcus	0.000397725	0.000562341	0
g__Stenotrophomonas	0.000397725	0.000511051	0
g__Streptococcus	0.0121115	0.00520307	0.000486157
g__Sutterella	1.01435	0.383024	0.398353
g__Thalassospira	0	0.000562341	0
g__Turicibacter	5.37699	0	1.71056
g__Verrucomicrobium	0.00103246	0	0
g__Vibrio	0.000516228	0	0
g__Weissella	0.00119318	0	0.00045996
unclassified	27.8984	47.5125	37.6826

## Sheet: Species
	DSS+Scr siRNA	Rab7 siRNA	Scr siRNA
s__Acinetobacter_rhizosphaerae	0.00119128	0	0
s__Akkermansia_muciniphila	15.2885	0.00383381	0.0605669
s__Alistipes_indistinctus	0.0120383	0.0221895	0.0272361
s__Alistipes_massiliensis	0	0	0.000919921
s__Alistipes_putredinis	0	0.000355139	0
s__Bacteroides_acidifaciens	7.93552	0.820867	0.567275
s__Bacteroides_uniformis	0.0149774	0.00281171	0.00972786
s__Bifidobacterium_adolescentis	0	0.000355139	0
s__Bifidobacterium_animalis	1.19306	0.923022	0.941366
s__Bifidobacterium_longum	0	0	0.000486157
s__Bifidobacterium_thermacidophilum	0	0	0.000486157
s__Butyricicoccus_pullicaecorum	0.0144366	0.00663365	0.0146527
s__Clostridium_methylpentosum	0.0196001	0.00784496	0.0162964
s__Clostridium_ruminantium	0.00170751	0	0
s__Desulfovibrio_C2c20	0.295158	0.144565	1.53984
s__Dorea_longicatena	0	0	0.00045996
s__Escherichia_coli	0.147718	0	0
s__Faecalibacterium_prausnitzii	0.000516228	0.00157647	0.00137988
s__Gemmiger_formicilis	0.00079545	0.000562341	0.00864604
s__Helicobacter_apodemus	0.00103246	0.000511051	0.00045996
s__Helicobacter_ganmani	0.00158901	0	0.000973258
s__Helicobacter_hepaticus	0	0.00509048	0
s__Labrenzia_aggregata	0	0.00112468	0
s__Lactobacillus_hamsteri	0	0.000511051	0.0130675
s__Lactobacillus_helveticus	0	1.28585	6.10984
s__Lactobacillus_manihotivorans	0	0	0.00045996
s__Lactobacillus_mucosae	0	0	0.000973258
s__Lactobacillus_plantarum	0	0.000511051	0
s__Lactobacillus_ruminis	0.000913953	0.00122133	0
s__Lactobacillus_salivarius	0	0.000511051	0
s__Lactobacillus_vaginalis	0.0028988	0.0116988	0.0252622
s__Micrococcus_luteus	0	0	0.000486157
s__Mucispirillum_schaedleri	0.190384	0.00373123	0.141505
s__Oscillospira_guilliermondii	0	0.000511051	0
s__Parabacteroides_distasonis	0.572591	0.494901	0.59291
s__Parabacteroides_gordonii	0.00131168	0.00106542	0
s__Prevotella_copri	0	0	0.00045996
s__Roseburia_inulinivorans	0	0.000355139	0
s__Rothia_nasimurium	0.000516228	0	0
s__Ruminococcus_gnavus	1.00946	0.824794	5.14398
s__Ruminococcus_lactaris	0	0.000511051	0
s__Staphylococcus_sciuri	0.000397725	0.000562341	0
s__Stenotrophomonas_maltophilia	0.000397725	0.000511051	0
s__Thalassospira_xiamenensis	0	0.000562341	0
s__Verrucomicrobium_spinosum	0.00103246	0	0
s__Vibrio_harveyi	0.000516228	0	0
s__Weissella_cibaria	0.00119318	0	0.00045996
unclassified	73.2906	95.4309	84.7798
