# Supplementary material for: Rab7-dependent regulation of goblet cell protein CLCA1 modulates gastrointestinal homeostasis
Source: eLife. 2024 Apr 9;12:RP89776. doi: 10.7554/eLife.89776 (PMC11003743; doi:10.7554/eLife.89776)
Supplement: Figure 6—source data 1. [file elife-89776-fig6-data1.csv]

	Protein IDs	Majority protein IDs	Peptide counts (all)	Peptide counts (razor+unique)	Peptide counts (unique)	Protein names	Gene names	Fasta headers	Number of proteins	Peptides	Razor + unique peptides	Unique peptides	Peptides 0_Preshka_UT_11	Peptides 1_Preshka_UT_12	Peptides 10_Preshka_Scrambled_12	Peptides 11_Preshka_Scrambled_13	Peptides 12_Preshka_Scrambled_21	Peptides 13_Preshka_Scrambled_22	Peptides 14_Preshka_Scrambled_23	Peptides 15_Preshka_Scrambled_31	Peptides 16_Preshka_Scrambled_32	Peptides 17_Preshka_Scrambled_33	Peptides 18_Preshka_Rab7_11	Peptides 19_Preshka_Rab7_12	Peptides 2_Preshka_UT_13	Peptides 20_Preshka_Rab7_13	Peptides 21_Preshka_Rab7_21	Peptides 22_Preshka_Rab7_22	Peptides 23_Preshka_Rab7_23	Peptides 24_Preshka_Rab7_31	Peptides 25_Preshka_Rab7_32	Peptides 26_Preshka_Rab7_33	Peptides 27_Preshka_DSS_11	Peptides 28_Preshka_DSS_12	Peptides 29_Preshka_DSS_13	Peptides 3_Preshka_UT_21	Peptides 30_Preshka_DSS_21	Peptides 31_Preshka_DSS_22	Peptides 32_Preshka_DSS_23	Peptides 33_Preshka_DSS_31	Peptides 34_Preshka_DSS_32	Peptides 35_Preshka_DSS_33	Peptides 36_Preshka_DSSScrambled_11	Peptides 37_Preshka_DSSScrambled_12	Peptides 38_Preshka_DSSScrambled_13	Peptides 39_Preshka_DSSScrambled_21	Peptides 4_Preshka_UT_22	Peptides 40_Preshka_DSSScrambled_22	Peptides 41_Preshka_DSSScrambled_23
0	A2AWA9	A2AWA9	1	1	1	Rab GTPase-activating protein 1	Rabgap1	sp|A2AWA9|RBGP1_MOUSE Rab GTPase-activating protein 1 OS=Mus musculus OX=10090 GN=Rabgap1 PE=1 SV=1	1	1	1	1	1	0	0	0	0	0	0	0	0	0	0	1	0	1	0	0	0	1	0	0	0	0	0	0	0	1	0	0	0	0	0	0	1	0	0	0	0
1	A6H690	A6H690	3	3	3	IQ and AAA domain-containing protein 1-like	Iqca1l	sp|A6H690|IQCAL_MOUSE IQ and AAA domain-containing protein 1-like OS=Mus musculus OX=10090 GN=Iqca1l PE=1 SV=3	1	3	3	3	0	0	0	0	0	1	0	0	0	0	0	0	0	1	0	0	0	0	0	0	0	0	0	0	0	0	0	0	0	1	0	0	0	0	0	0	0
2	C0HKE9;C0HKE8;C0HKE7;C0HKE6;C0HKE5;C0HKE4;C0HKE3;C0HKE2;C0HKE1;Q8CGP6;Q8R1M2;Q8CGP7;Q8CGP5;Q8BFU2;P27661	C0HKE9;C0HKE8;C0HKE7;C0HKE6;C0HKE5;C0HKE4;C0HKE3;C0HKE2;C0HKE1;Q8CGP6;Q8R1M2;Q8CGP7;Q8CGP5;Q8BFU2;P27661	4;4;4;4;4;4;4;4;4;4;4;4;4;4;3	4;4;4;4;4;4;4;4;4;4;4;4;4;4;3	1;1;1;1;1;1;1;1;1;1;1;1;1;1;1	Histone H2A type 1-H;Histone H2A.J;Histone H2A type 1-K;Histone H2A type 1-F;Histone H2A type 3;Histone H2AX	Hist1h2ah;H2afj;Hist1h2ak;Hist1h2af;Hist3h2a;H2afx	sp|C0HKE9|H2A1P_MOUSE Histone H2A type 1-P OS=Mus musculus OX=10090 GN=Hist1h2ap PE=1 SV=1;sp|C0HKE8|H2A1O_MOUSE Histone H2A type 1-O OS=Mus musculus OX=10090 GN=Hist1h2ao PE=1 SV=1;sp|C0HKE7|H2A1N_MOUSE Histone H2A type 1-N OS=Mus musculus OX=10090 GN=His	15	4	4	1	4	4	3	4	3	3	3	3	3	3	4	4	4	3	3	3	3	3	3	3	4	3	3	3	3	3	3	4	3	3	3	3	3	3	4	3	3
3	D3Z6P0	D3Z6P0	17	17	17	Protein disulfide-isomerase A2	Pdia2	sp|D3Z6P0|PDIA2_MOUSE Protein disulfide-isomerase A2 OS=Mus musculus OX=10090 GN=Pdia2 PE=1 SV=1	1	17	17	17	1	0	1	0	1	1	1	2	0	0	1	0	0	1	5	5	4	1	1	0	0	1	0	1	0	0	1	1	1	0	0	4	0	4	0	7	3
4	E9PV24	E9PV24	2	2	2	Fibrinogen alpha chain;Fibrinopeptide A;Fibrinogen alpha chain	Fga	sp|E9PV24|FIBA_MOUSE Fibrinogen alpha chain OS=Mus musculus OX=10090 GN=Fga PE=1 SV=1	1	2	2	2	0	0	0	0	0	0	0	0	0	0	0	0	0	0	0	0	0	0	0	0	0	0	0	0	0	0	0	0	0	0	0	0	0	0	1	0	1
5	O08528;P17710;Q3TRM8	O08528;P17710;Q3TRM8	2;2;1	2;2;1	2;2;1	Hexokinase-2;Hexokinase-1;Hexokinase-3	Hk2;Hk1;Hk3	sp|O08528|HXK2_MOUSE Hexokinase-2 OS=Mus musculus OX=10090 GN=Hk2 PE=1 SV=1;sp|P17710|HXK1_MOUSE Hexokinase-1 OS=Mus musculus OX=10090 GN=Hk1 PE=1 SV=3;sp|Q3TRM8|HXK3_MOUSE Hexokinase-3 OS=Mus musculus OX=10090 GN=Hk3 PE=1 SV=2	3	2	2	2	0	0	0	0	0	1	0	0	0	0	0	0	1	1	0	0	0	0	0	1	0	0	0	0	0	1	0	0	0	0	0	0	0	0	0	0	1
6	O08638	O08638	22	22	17	Myosin-11	Myh11	sp|O08638|MYH11_MOUSE Myosin-11 OS=Mus musculus OX=10090 GN=Myh11 PE=1 SV=1	1	22	22	17	1	3	4	1	1	1	0	0	0	1	9	6	3	9	2	4	2	8	9	7	5	6	6	1	10	5	9	4	4	5	5	6	2	0	2	1	2
7	O08709	O08709	13	13	13	Peroxiredoxin-6	Prdx6	sp|O08709|PRDX6_MOUSE Peroxiredoxin-6 OS=Mus musculus OX=10090 GN=Prdx6 PE=1 SV=3	1	13	13	13	8	7	6	9	8	10	10	11	9	9	6	6	9	6	4	8	7	6	10	6	8	8	9	6	9	6	5	9	9	7	7	9	9	4	6	5	8
8	O08756	O08756	1	1	1	3-hydroxyacyl-CoA dehydrogenase type-2	Hsd17b10	sp|O08756|HCD2_MOUSE 3-hydroxyacyl-CoA dehydrogenase type-2 OS=Mus musculus OX=10090 GN=Hsd17b10 PE=1 SV=4	1	1	1	1	0	0	1	0	0	0	1	0	0	0	0	0	0	0	0	0	0	0	0	0	0	0	0	0	0	0	0	0	1	0	0	1	0	1	0	0	0
9	O08795	O08795	2	2	2	Glucosidase 2 subunit beta	Prkcsh	sp|O08795|GLU2B_MOUSE Glucosidase 2 subunit beta OS=Mus musculus OX=10090 GN=Prkcsh PE=1 SV=1	1	2	2	2	0	0	1	0	0	0	0	0	0	1	1	0	1	2	0	0	0	0	0	1	1	0	0	0	1	0	0	1	1	0	0	1	0	1	0	1	0
10	O08807	O08807	2	1	1	Peroxiredoxin-4	Prdx4	sp|O08807|PRDX4_MOUSE Peroxiredoxin-4 OS=Mus musculus OX=10090 GN=Prdx4 PE=1 SV=1	1	2	1	1	1	2	2	1	2	2	2	2	2	2	2	1	2	2	2	1	2	1	2	2	2	2	2	2	2	2	2	2	2	2	2	2	2	1	2	2	2
11	O09061	O09061	2	2	2	Proteasome subunit beta type-1	Psmb1	sp|O09061|PSB1_MOUSE Proteasome subunit beta type-1 OS=Mus musculus OX=10090 GN=Psmb1 PE=1 SV=1	1	2	2	2	1	1	1	0	0	0	0	1	0	0	1	0	1	1	0	0	0	1	0	0	0	0	0	0	0	1	0	0	0	0	1	0	0	0	0	0	0
12	O09131;Q8K2Q2	O09131	6;1	6;1	6;1	Glutathione S-transferase omega-1	Gsto1	sp|O09131|GSTO1_MOUSE Glutathione S-transferase omega-1 OS=Mus musculus OX=10090 GN=Gsto1 PE=1 SV=2	2	6	6	6	3	1	2	3	0	1	3	2	1	2	2	3	3	1	1	3	2	3	1	2	1	4	5	1	1	2	2	2	1	4	1	4	2	2	2	3	2
13	O35129	O35129	5	5	5	Prohibitin-2	Phb2	sp|O35129|PHB2_MOUSE Prohibitin-2 OS=Mus musculus OX=10090 GN=Phb2 PE=1 SV=1	1	5	5	5	2	3	0	2	2	1	2	2	2	0	1	0	1	0	1	0	1	2	2	0	1	0	0	0	1	0	1	3	2	1	0	1	2	4	1	0	1
14	O35215	O35215	2	2	2	D-dopachrome decarboxylase	Ddt	sp|O35215|DOPD_MOUSE D-dopachrome decarboxylase OS=Mus musculus OX=10090 GN=Ddt PE=1 SV=3	1	2	2	2	0	0	1	0	0	0	0	0	0	0	0	0	0	1	1	0	0	1	0	1	1	0	1	0	0	0	0	0	0	0	1	0	0	0	1	0	0
15	O35639	O35639	3	3	3	Annexin A3	Anxa3	sp|O35639|ANXA3_MOUSE Annexin A3 OS=Mus musculus OX=10090 GN=Anxa3 PE=1 SV=4	1	3	3	3	1	1	1	0	0	0	1	0	0	0	0	0	0	1	1	0	0	1	1	0	1	1	0	0	1	1	1	1	0	1	0	1	0	0	0	0	0
16	O35855	O35855	2	2	2	Branched-chain-amino-acid aminotransferase, mitochondrial	Bcat2	sp|O35855|BCAT2_MOUSE Branched-chain-amino-acid aminotransferase, mitochondrial OS=Mus musculus OX=10090 GN=Bcat2 PE=1 SV=2	1	2	2	2	0	0	0	0	0	0	0	0	0	0	0	0	0	0	1	0	1	0	0	0	0	0	0	0	0	0	0	0	0	0	0	0	0	1	0	0	0
17	O54734	O54734	2	2	2	Dolichyl-diphosphooligosaccharide--protein glycosyltransferase 48 kDa subunit	Ddost	sp|O54734|OST48_MOUSE Dolichyl-diphosphooligosaccharide--protein glycosyltransferase 48 kDa subunit OS=Mus musculus OX=10090 GN=Ddost PE=1 SV=2	1	2	2	2	0	0	1	1	0	0	0	1	1	0	0	1	0	1	0	0	0	0	1	0	0	1	0	0	1	0	0	1	0	1	0	0	0	2	1	1	0
18	O70251	O70251	3	3	3	Elongation factor 1-beta	Eef1b	sp|O70251|EF1B_MOUSE Elongation factor 1-beta OS=Mus musculus OX=10090 GN=Eef1b PE=1 SV=5	1	3	3	3	1	0	1	1	2	1	0	1	1	1	0	1	2	0	1	0	0	2	1	2	1	1	0	1	1	1	2	1	0	0	0	0	0	1	1	0	1
19	O70400	O70400	3	3	3	PDZ and LIM domain protein 1	Pdlim1	sp|O70400|PDLI1_MOUSE PDZ and LIM domain protein 1 OS=Mus musculus OX=10090 GN=Pdlim1 PE=1 SV=4	1	3	3	3	1	2	0	0	2	2	0	1	2	2	1	1	1	0	2	1	0	2	0	1	0	1	0	2	0	2	1	1	2	1	0	2	0	0	1	0	0
20	O70435	O70435	2	2	2	Proteasome subunit alpha type-3	Psma3	sp|O70435|PSA3_MOUSE Proteasome subunit alpha type-3 OS=Mus musculus OX=10090 GN=Psma3 PE=1 SV=3	1	2	2	2	0	0	1	0	0	0	0	0	0	0	0	0	0	0	0	0	0	0	0	0	0	0	0	0	0	0	0	0	1	1	0	0	0	0	0	0	0
21	O70456	O70456	4	2	2	14-3-3 protein sigma	Sfn	sp|O70456|1433S_MOUSE 14-3-3 protein sigma OS=Mus musculus OX=10090 GN=Sfn PE=1 SV=2	1	4	2	2	1	2	2	1	2	1	2	2	2	1	2	2	2	2	2	3	2	3	2	1	2	3	2	2	2	3	2	4	2	3	2	2	1	2	2	2	2
22	O70475	O70475	10	10	10	UDP-glucose 6-dehydrogenase	Ugdh	sp|O70475|UGDH_MOUSE UDP-glucose 6-dehydrogenase OS=Mus musculus OX=10090 GN=Ugdh PE=1 SV=1	1	10	10	10	6	5	6	3	4	4	6	3	5	4	4	6	5	5	3	2	4	2	3	3	3	4	3	4	4	2	4	3	2	4	8	7	3	2	5	4	3
23	O88312	O88312	7	7	7	Anterior gradient protein 2 homolog	Agr2	sp|O88312|AGR2_MOUSE Anterior gradient protein 2 homolog OS=Mus musculus OX=10090 GN=Agr2 PE=1 SV=1	1	7	7	7	7	7	7	6	7	7	7	7	7	7	7	7	7	6	6	7	6	7	7	7	6	6	7	5	6	5	7	7	7	6	7	7	6	6	7	7	6
24	O88456	O88456	2	2	2	Calpain small subunit 1	Capns1	sp|O88456|CPNS1_MOUSE Calpain small subunit 1 OS=Mus musculus OX=10090 GN=Capns1 PE=1 SV=1	1	2	2	2	1	0	0	0	0	0	1	0	0	0	0	1	0	1	0	0	1	0	0	0	0	0	0	0	0	0	0	0	0	0	0	1	0	0	0	1	0
25	O88569	O88569	7	7	7	Heterogeneous nuclear ribonucleoproteins A2/B1	Hnrnpa2b1	sp|O88569|ROA2_MOUSE Heterogeneous nuclear ribonucleoproteins A2/B1 OS=Mus musculus OX=10090 GN=Hnrnpa2b1 PE=1 SV=2	1	7	7	7	3	2	4	1	2	4	4	1	2	3	1	3	5	6	0	1	4	5	2	4	5	4	4	4	3	2	2	4	2	4	4	5	5	3	5	3	2
26	O88844	O88844	7	7	6	Isocitrate dehydrogenase [NADP] cytoplasmic	Idh1	sp|O88844|IDHC_MOUSE Isocitrate dehydrogenase [NADP] cytoplasmic OS=Mus musculus OX=10090 GN=Idh1 PE=1 SV=2	1	7	7	6	0	1	3	2	1	1	2	2	2	3	2	2	2	1	0	2	2	2	3	4	2	1	2	2	0	2	3	3	4	0	4	4	4	1	3	2	1
27	P00329	P00329	5	5	5	Alcohol dehydrogenase 1	Adh1	sp|P00329|ADH1_MOUSE Alcohol dehydrogenase 1 OS=Mus musculus OX=10090 GN=Adh1 PE=1 SV=2	1	5	5	5	2	1	1	1	1	0	1	0	1	3	1	2	1	2	1	1	0	2	0	2	0	1	2	0	1	2	1	1	1	0	1	1	1	1	1	0	2
28	P00405	P00405	5	5	5	Cytochrome c oxidase subunit 2	Mtco2	sp|P00405|COX2_MOUSE Cytochrome c oxidase subunit 2 OS=Mus musculus OX=10090 GN=Mtco2 PE=1 SV=1	1	5	5	5	5	3	3	3	3	4	4	2	3	2	5	3	5	4	2	4	3	5	3	3	4	2	3	3	2	3	4	4	4	3	3	2	4	3	5	3	5
29	P00688;P00687;CON__Q3MHH8	P00688	20;9;2	20;9;2	20;9;2	Pancreatic alpha-amylase	Amy2	sp|P00688|AMYP_MOUSE Pancreatic alpha-amylase OS=Mus musculus OX=10090 GN=Amy2 PE=1 SV=2	3	20	20	20	2	1	0	2	11	9	10	2	1	3	1	2	2	3	12	12	14	5	2	0	0	1	3	3	0	3	2	1	0	0	4	1	2	14	0	13	10
30	P00920	P00920	10	10	10	Carbonic anhydrase 2	Ca2	sp|P00920|CAH2_MOUSE Carbonic anhydrase 2 OS=Mus musculus OX=10090 GN=Ca2 PE=1 SV=4	1	10	10	10	3	4	2	6	4	3	6	5	4	4	7	4	3	5	4	4	4	2	6	3	5	8	4	4	2	6	1	5	2	6	4	2	4	3	5	2	1
31	P01027	P01027	1	1	1	Complement C3;Complement C3 beta chain;C3-beta-c;Complement C3 alpha chain;C3a anaphylatoxin;Acylation stimulating protein;Complement C3b alpha chain;Complement C3c alpha chain fragment 1;Complement C3dg fragment;Complement C3g fragment;Complement C3d fragment;Complement C3f fragment;Complement C3c alpha chain fragment 2	C3	sp|P01027|CO3_MOUSE Complement C3 OS=Mus musculus OX=10090 GN=C3 PE=1 SV=3	1	1	1	1	0	0	0	0	0	0	0	0	0	0	0	0	0	0	0	0	0	0	0	0	0	0	0	0	0	0	0	0	0	0	0	0	0	0	0	0	0
32	P01899;P14430;P14429;P14431;P01898;P01897;P01896;P01895;P14428;P14426;P01900;P01902;P03991;P04223;P01901	P01899;P14430;P14429;P14431;P01898;P01897	4;3;3;2;2;2;1;1;1;1;1;1;1;1;1	4;3;3;2;2;2;1;1;1;1;1;1;1;1;1	4;3;3;2;2;2;1;1;1;1;1;1;1;1;1	H-2 class I histocompatibility antigen, D-B alpha chain;H-2 class I histocompatibility antigen, Q8 alpha chain;H-2 class I histocompatibility antigen, Q7 alpha chain;H-2 class I histocompatibility antigen, Q9 alpha chain;H-2 class I histocompatibility antigen, Q10 alpha chain;H-2 class I histocompatibility antigen, L-D alpha chain	H2-D1;H2-Q8;H2-Q7;H2-Q9;H2-Q10;H2-L	sp|P01899|HA11_MOUSE H-2 class I histocompatibility antigen, D-B alpha chain OS=Mus musculus OX=10090 GN=H2-D1 PE=1 SV=2;sp|P14430|HA18_MOUSE H-2 class I histocompatibility antigen, Q8 alpha chain OS=Mus musculus OX=10090 GN=H2-Q8 PE=3 SV=1;sp|P14429|HA17_	15	4	4	4	0	0	0	0	0	0	0	0	0	0	0	0	0	0	0	0	0	0	0	0	1	0	0	0	0	0	0	1	0	2	0	0	0	0	0	0	0
33	P01942	P01942	6	6	4	Hemoglobin subunit alpha	Hba	sp|P01942|HBA_MOUSE Hemoglobin subunit alpha OS=Mus musculus OX=10090 GN=Hba PE=1 SV=2	1	6	6	4	4	6	5	5	6	3	6	4	4	6	5	5	4	6	5	5	4	4	6	5	5	6	6	4	5	6	6	6	5	6	6	5	6	6	5	6	6
34	P02088;P02089;CON__Q3SX09;CON__P02070;P02104	P02088;P02089	8;4;2;1;1	8;4;2;1;1	8;4;2;1;1	Hemoglobin subunit beta-1;Hemoglobin subunit beta-2	Hbb-b1;Hbb-b2	sp|P02088|HBB1_MOUSE Hemoglobin subunit beta-1 OS=Mus musculus OX=10090 GN=Hbb-b1 PE=1 SV=2;sp|P02089|HBB2_MOUSE Hemoglobin subunit beta-2 OS=Mus musculus OX=10090 GN=Hbb-b2 PE=1 SV=2	5	8	8	8	6	5	5	5	5	4	6	3	5	6	5	6	6	6	6	5	5	6	6	6	7	7	8	5	6	7	7	7	6	6	6	6	6	7	5	7	7
35	P84244;P84228;P68433;P02301	P84244;P84228;P68433;P02301	3;3;3;3	3;3;3;3	3;3;3;3	Histone H3.3;Histone H3.2;Histone H3.1;Histone H3.3C	H3f3a;Hist1h3b;Hist1h3a;H3f3c	sp|P84244|H33_MOUSE Histone H3.3 OS=Mus musculus OX=10090 GN=H3-3a PE=1 SV=2;sp|P84228|H32_MOUSE Histone H3.2 OS=Mus musculus OX=10090 GN=H3c2 PE=1 SV=2;sp|P68433|H31_MOUSE Histone H3.1 OS=Mus musculus OX=10090 GN=H3c1 PE=1 SV=2;sp|P02301|H3C_MOUSE Histone	4	3	3	3	3	2	3	2	3	2	3	3	2	3	3	3	3	2	3	2	2	2	3	3	2	2	3	3	3	2	2	3	2	1	2	3	2	2	2	3	2
36	P03930	P03930	1	1	1	ATP synthase protein 8	Mtatp8	sp|P03930|ATP8_MOUSE ATP synthase protein 8 OS=Mus musculus OX=10090 GN=Mtatp8 PE=1 SV=1	1	1	1	1	1	0	1	0	1	1	1	0	0	0	0	1	1	0	1	0	1	1	0	0	0	1	0	0	0	0	0	1	1	0	1	0	0	0	0	0	1
37	P04104	P04104	2	1	1	Keratin, type II cytoskeletal 1	Krt1	sp|P04104|K2C1_MOUSE Keratin, type II cytoskeletal 1 OS=Mus musculus OX=10090 GN=Krt1 PE=1 SV=4	1	2	1	1	1	1	1	2	1	1	1	1	1	2	1	1	1	1	2	1	1	1	1	1	1	1	1	1	1	1	1	2	1	1	1	1	1	2	1	2	1
38	P04117	P04117	3	3	3	Fatty acid-binding protein, adipocyte	Fabp4	sp|P04117|FABP4_MOUSE Fatty acid-binding protein, adipocyte OS=Mus musculus OX=10090 GN=Fabp4 PE=1 SV=3	1	3	3	3	0	0	1	0	0	0	0	1	0	0	1	0	0	1	1	0	0	1	0	0	0	1	2	0	1	0	0	0	1	1	2	1	1	0	0	0	2
39	P05064;P05063	P05064	8;1	8;1	7;0	Fructose-bisphosphate aldolase A	Aldoa	sp|P05064|ALDOA_MOUSE Fructose-bisphosphate aldolase A OS=Mus musculus OX=10090 GN=Aldoa PE=1 SV=2	2	8	8	7	5	4	2	1	5	4	3	4	2	2	5	6	1	2	3	2	4	2	4	1	4	2	1	1	3	2	3	3	4	4	4	2	1	2	1	4	2
40	P05201	P05201	2	2	2	Aspartate aminotransferase, cytoplasmic	Got1	sp|P05201|AATC_MOUSE Aspartate aminotransferase, cytoplasmic OS=Mus musculus OX=10090 GN=Got1 PE=1 SV=3	1	2	2	2	0	0	0	0	0	0	0	0	0	0	0	0	1	0	0	0	0	0	1	0	0	0	0	0	0	0	0	0	0	0	0	0	0	0	0	0	0
41	P05202	P05202	3	3	3	Aspartate aminotransferase, mitochondrial	Got2	sp|P05202|AATM_MOUSE Aspartate aminotransferase, mitochondrial OS=Mus musculus OX=10090 GN=Got2 PE=1 SV=1	1	3	3	3	1	1	2	1	2	0	2	0	1	0	1	1	1	1	1	0	0	0	0	0	1	1	1	2	1	0	3	0	0	1	1	1	1	0	0	1	0
42	P05208	P05208	4	4	4	Chymotrypsin-like elastase family member 2A	Cela2a	sp|P05208|CEL2A_MOUSE Chymotrypsin-like elastase family member 2A OS=Mus musculus OX=10090 GN=Cela2a PE=1 SV=1	1	4	4	4	0	0	0	0	2	1	0	0	0	0	0	0	0	0	1	2	3	0	0	0	0	0	0	0	1	0	0	0	0	0	0	0	1	2	0	0	2
43	P68373;P05213;P68369;P05214;Q9JJZ2;Q3UX10	P68373;P05213;P68369;P05214;Q9JJZ2	10;10;9;7;6;1	10;10;9;7;6;1	2;2;2;0;0;0	Tubulin alpha-1C chain;Tubulin alpha-1B chain;Tubulin alpha-1A chain;Tubulin alpha-3 chain;Tubulin alpha-8 chain	Tuba1c;Tuba1b;Tuba1a;Tuba3a;Tuba8	sp|P68373|TBA1C_MOUSE Tubulin alpha-1C chain OS=Mus musculus OX=10090 GN=Tuba1c PE=1 SV=1;sp|P05213|TBA1B_MOUSE Tubulin alpha-1B chain OS=Mus musculus OX=10090 GN=Tuba1b PE=1 SV=2;sp|P68369|TBA1A_MOUSE Tubulin alpha-1A chain OS=Mus musculus OX=10090 GN=Tub	6	10	10	2	5	3	5	5	3	6	4	5	5	4	4	4	6	5	7	6	5	6	6	7	4	6	3	4	8	6	6	8	4	4	6	6	4	6	5	3	4
44	P06151	P06151	9	9	8	L-lactate dehydrogenase A chain	Ldha	sp|P06151|LDHA_MOUSE L-lactate dehydrogenase A chain OS=Mus musculus OX=10090 GN=Ldha PE=1 SV=3	1	9	9	8	7	7	6	8	7	5	7	8	6	7	7	5	6	5	7	7	7	8	6	6	8	7	7	7	8	4	6	7	8	8	6	6	5	6	6	7	7
45	P06745;CON__Q3ZBD7	P06745	8;3	8;3	8;3	Glucose-6-phosphate isomerase	Gpi	sp|P06745|G6PI_MOUSE Glucose-6-phosphate isomerase OS=Mus musculus OX=10090 GN=Gpi PE=1 SV=4	2	8	8	8	1	1	4	1	3	2	3	0	4	0	0	5	1	3	2	3	2	2	3	3	2	1	2	2	1	2	2	1	0	1	2	3	1	2	1	2	2
46	P07146	P07146	3	3	3	Anionic trypsin-2	Prss2	sp|P07146|TRY2_MOUSE Anionic trypsin-2 OS=Mus musculus OX=10090 GN=Prss2 PE=1 SV=1	1	3	3	3	0	0	0	0	1	0	0	0	0	0	0	0	0	0	1	2	2	0	0	0	0	0	0	0	0	0	0	0	0	0	0	0	0	1	0	1	1
47	P07356	P07356	15	15	15	Annexin A2	Anxa2	sp|P07356|ANXA2_MOUSE Annexin A2 OS=Mus musculus OX=10090 GN=Anxa2 PE=1 SV=2	1	15	15	15	8	7	6	7	7	8	7	7	3	5	7	3	6	7	3	4	8	6	9	10	7	7	9	5	9	8	7	7	10	9	8	7	7	9	6	9	9
48	P07724	P07724	14	14	14	Serum albumin	Alb	sp|P07724|ALBU_MOUSE Serum albumin OS=Mus musculus OX=10090 GN=Alb PE=1 SV=3	1	14	14	14	6	5	3	4	4	4	4	5	4	3	6	7	6	8	4	8	4	7	8	6	8	6	6	3	8	7	7	8	8	9	8	7	7	7	4	9	6
49	P07759	P07759	2	2	2	Serine protease inhibitor A3K	Serpina3k	sp|P07759|SPA3K_MOUSE Serine protease inhibitor A3K OS=Mus musculus OX=10090 GN=Serpina3k PE=1 SV=2	1	2	2	2	0	0	0	0	0	0	0	0	0	0	0	1	0	0	0	0	0	1	0	0	0	0	0	0	0	0	1	0	0	0	0	1	0	0	0	0	0
50	P07901	P07901	12	6	6	Heat shock protein HSP 90-alpha	Hsp90aa1	sp|P07901|HS90A_MOUSE Heat shock protein HSP 90-alpha OS=Mus musculus OX=10090 GN=Hsp90aa1 PE=1 SV=4	1	12	6	6	5	5	6	6	6	5	7	4	5	6	6	6	5	9	4	5	8	8	8	6	5	5	5	3	6	6	4	4	4	7	8	5	5	5	4	4	6
51	P08003	P08003	6	6	6	Protein disulfide-isomerase A4	Pdia4	sp|P08003|PDIA4_MOUSE Protein disulfide-isomerase A4 OS=Mus musculus OX=10090 GN=Pdia4 PE=1 SV=3	1	6	6	6	0	1	1	0	0	1	0	1	2	0	1	1	1	2	0	0	1	2	1	2	0	0	0	0	2	0	0	2	1	1	1	1	0	1	0	3	1
52	P08113	P08113	11	10	10	Endoplasmin	Hsp90b1	sp|P08113|ENPL_MOUSE Endoplasmin OS=Mus musculus OX=10090 GN=Hsp90b1 PE=1 SV=2	1	11	10	10	8	4	4	3	7	4	5	5	6	5	6	5	5	7	8	5	7	5	8	5	7	5	3	4	6	7	6	4	4	7	7	6	9	6	4	8	5
53	P08228	P08228	4	4	4	Superoxide dismutase [Cu-Zn]	Sod1	sp|P08228|SODC_MOUSE Superoxide dismutase [Cu-Zn] OS=Mus musculus OX=10090 GN=Sod1 PE=1 SV=2	1	4	4	4	3	4	3	3	4	4	3	4	4	3	3	4	2	3	4	4	4	2	2	4	3	4	4	2	2	3	2	4	3	4	3	3	4	2	2	1	3
54	P08249	P08249	11	11	11	Malate dehydrogenase, mitochondrial	Mdh2	sp|P08249|MDHM_MOUSE Malate dehydrogenase, mitochondrial OS=Mus musculus OX=10090 GN=Mdh2 PE=1 SV=3	1	11	11	11	7	6	8	9	6	5	8	6	5	10	6	6	8	8	5	5	5	7	6	6	3	4	4	6	6	8	7	5	8	7	9	10	8	8	7	7	7
55	P09103	P09103	19	19	19	Protein disulfide-isomerase	P4hb	sp|P09103|PDIA1_MOUSE Protein disulfide-isomerase OS=Mus musculus OX=10090 GN=P4hb PE=1 SV=2	1	19	19	19	5	6	8	8	10	12	7	8	10	6	8	7	6	6	10	10	10	8	6	9	4	7	8	7	7	7	7	5	7	7	7	7	6	10	5	6	8
56	P09405	P09405	8	8	8	Nucleolin	Ncl	sp|P09405|NUCL_MOUSE Nucleolin OS=Mus musculus OX=10090 GN=Ncl PE=1 SV=2	1	8	8	8	2	1	1	0	2	1	0	2	1	3	1	0	2	1	0	2	1	3	3	1	1	1	1	0	3	3	3	2	3	0	1	1	3	2	2	0	2
57	P09411;P09041	P09411	11;3	11;3	11;3	Phosphoglycerate kinase 1	Pgk1	sp|P09411|PGK1_MOUSE Phosphoglycerate kinase 1 OS=Mus musculus OX=10090 GN=Pgk1 PE=1 SV=4	2	11	11	11	5	4	7	3	3	2	6	2	5	3	4	3	4	6	3	5	3	5	3	3	2	2	4	5	4	4	4	2	4	6	5	5	5	3	4	4	3
58	P09671	P09671	1	1	1	Superoxide dismutase [Mn], mitochondrial	Sod2	sp|P09671|SODM_MOUSE Superoxide dismutase [Mn], mitochondrial OS=Mus musculus OX=10090 GN=Sod2 PE=1 SV=3	1	1	1	1	1	0	0	0	0	0	0	0	0	0	0	0	1	0	0	0	0	0	1	0	0	0	0	0	1	0	0	0	0	0	1	1	1	1	1	0	1
59	P09803	P09803	2	2	2	Cadherin-1;E-Cad/CTF1;E-Cad/CTF2;E-Cad/CTF3	Cdh1	sp|P09803|CADH1_MOUSE Cadherin-1 OS=Mus musculus OX=10090 GN=Cdh1 PE=1 SV=1	1	2	2	2	0	0	1	1	1	0	1	1	0	0	0	0	0	0	0	0	0	1	1	0	0	1	1	1	1	0	0	0	1	1	0	0	0	0	0	1	1
60	Q3THW5;P0C0S6	Q3THW5;P0C0S6	3;3	1;1	1;1	Histone H2A.V;Histone H2A.Z	H2afv;H2afz	sp|Q3THW5|H2AV_MOUSE Histone H2A.V OS=Mus musculus OX=10090 GN=H2az2 PE=1 SV=3;sp|P0C0S6|H2AZ_MOUSE Histone H2A.Z OS=Mus musculus OX=10090 GN=H2az1 PE=1 SV=2	2	3	1	1	3	3	3	3	3	3	3	3	2	2	3	3	2	2	3	3	2	3	3	3	3	2	3	3	3	3	3	3	3	3	3	2	3	2	3	3	2
61	P62984;P62983;P0CG49;P0CG50	P62984;P62983;P0CG49;P0CG50	4;4;4;4	4;4;4;4	4;4;4;4	Ubiquitin-60S ribosomal protein L40;Ubiquitin;60S ribosomal protein L40;Ubiquitin-40S ribosomal protein S27a;Ubiquitin;40S ribosomal protein S27a;Polyubiquitin-B;Ubiquitin;Polyubiquitin-C;Ubiquitin;Ubiquitin-related 1;Ubiquitin-related 2	Uba52;Rps27a;Ubb;Ubc	sp|P62984|RL40_MOUSE Ubiquitin-60S ribosomal protein L40 OS=Mus musculus OX=10090 GN=Uba52 PE=1 SV=2;sp|P62983|RS27A_MOUSE Ubiquitin-40S ribosomal protein S27a OS=Mus musculus OX=10090 GN=Rps27a PE=1 SV=2;sp|P0CG49|UBB_MOUSE Polyubiquitin-B OS=Mus musculus	4	4	4	4	3	2	3	3	2	3	3	3	3	3	4	3	3	4	4	3	3	3	4	3	3	2	4	3	3	2	3	4	4	3	3	3	3	3	3	2	3
62	P0DP28;P0DP27;P0DP26;Q9D6P8;P20801	P0DP28;P0DP27;P0DP26	5;5;5;1;1	5;5;5;1;1	5;5;5;1;1		P0DP28;P0DP27;P0DP26	sp|P0DP28|CALM3_MOUSE Calmodulin-3 OS=Mus musculus OX=10090 GN=Calm3 PE=1 SV=1;sp|P0DP27|CALM2_MOUSE Calmodulin-2 OS=Mus musculus OX=10090 GN=Calm2 PE=1 SV=1;sp|P0DP26|CALM1_MOUSE Calmodulin-1 OS=Mus musculus OX=10090 GN=Calm1 PE=1 SV=1	5	5	5	5	2	2	2	1	3	3	4	3	4	3	2	2	3	1	2	1	1	3	2	2	2	3	3	2	2	2	2	1	2	2	2	3	3	2	1	2	2
63	P10107	P10107	3	3	3	Annexin A1	Anxa1	sp|P10107|ANXA1_MOUSE Annexin A1 OS=Mus musculus OX=10090 GN=Anxa1 PE=1 SV=2	1	3	3	3	0	0	0	0	0	0	1	1	1	0	0	1	0	1	0	1	1	0	0	0	0	1	0	0	0	0	0	0	1	0	0	0	0	0	0	0	0
64	P10126;P62631	P10126;P62631	10;5	10;5	10;5	Elongation factor 1-alpha 1;Elongation factor 1-alpha 2	Eef1a1;Eef1a2	sp|P10126|EF1A1_MOUSE Elongation factor 1-alpha 1 OS=Mus musculus OX=10090 GN=Eef1a1 PE=1 SV=3;sp|P62631|EF1A2_MOUSE Elongation factor 1-alpha 2 OS=Mus musculus OX=10090 GN=Eef1a2 PE=1 SV=1	2	10	10	10	6	4	5	6	5	6	4	7	5	6	7	6	5	6	8	6	9	6	7	6	4	6	5	3	6	5	8	6	5	6	4	3	5	4	3	7	4
65	P10493	P10493	1	1	1	Nidogen-1	Nid1	sp|P10493|NID1_MOUSE Nidogen-1 OS=Mus musculus OX=10090 GN=Nid1 PE=1 SV=2	1	1	1	1	0	0	0	0	0	0	0	0	0	0	0	0	0	0	0	0	0	0	0	0	0	0	0	0	0	0	0	0	0	0	0	1	0	0	0	0	0
66	P10605	P10605	2	2	2	Cathepsin B;Cathepsin B light chain;Cathepsin B heavy chain	Ctsb	sp|P10605|CATB_MOUSE Cathepsin B OS=Mus musculus OX=10090 GN=Ctsb PE=1 SV=2	1	2	2	2	0	0	0	0	0	0	0	0	0	0	0	1	0	0	0	0	0	0	1	0	1	0	0	0	0	0	0	1	1	0	0	0	1	0	0	1	0
67	P10639	P10639	4	4	4	Thioredoxin	Txn	sp|P10639|THIO_MOUSE Thioredoxin OS=Mus musculus OX=10090 GN=Txn PE=1 SV=3	1	4	4	4	2	4	3	3	1	3	2	4	3	3	3	2	3	3	2	2	2	3	3	3	2	2	2	1	3	2	3	2	2	3	3	2	3	3	2	2	3
68	P10649;O35660	P10649	10;1	10;1	6;0	Glutathione S-transferase Mu 1	Gstm1	sp|P10649|GSTM1_MOUSE Glutathione S-transferase Mu 1 OS=Mus musculus OX=10090 GN=Gstm1 PE=1 SV=2	2	10	10	6	5	6	5	6	6	5	9	5	7	4	5	4	6	7	5	5	6	7	6	8	8	4	5	6	6	5	6	4	5	5	7	4	4	6	3	4	5
69	Q8CGP2;Q8CGP1;Q6ZWY9;Q64525;Q64478;Q64475;P10854;P10853;Q9D2U9;Q8CGP0;Q64524;P70696	Q8CGP2;Q8CGP1;Q6ZWY9;Q64525;Q64478;Q64475;P10854;P10853;Q9D2U9;Q8CGP0;Q64524;P70696	6;6;6;6;6;6;6;6;3;3;3;3	6;6;6;6;6;6;6;6;3;3;3;3	6;6;6;6;6;6;6;6;3;3;3;3	Histone H2B type 1-P;Histone H2B type 1-K;Histone H2B type 1-C/E/G;Histone H2B type 2-B;Histone H2B type 1-H;Histone H2B type 1-B;Histone H2B type 1-M;Histone H2B type 1-F/J/L;Histone H2B type 3-A;Histone H2B type 3-B;Histone H2B type 2-E;Histone H2B type 1-A	Hist1h2bp;Hist1h2bk;Hist1h2bc;Hist2h2bb;Hist1h2bh;Hist1h2bb;Hist1h2bm;Hist1h2bf;Hist3h2ba;Hist3h2bb;Hist2h2be;Hist1h2ba	sp|Q8CGP2|H2B1P_MOUSE Histone H2B type 1-P OS=Mus musculus OX=10090 GN=Hist1h2bp PE=1 SV=3;sp|Q8CGP1|H2B1K_MOUSE Histone H2B type 1-K OS=Mus musculus OX=10090 GN=H2bc12 PE=1 SV=3;sp|Q6ZWY9|H2B1C_MOUSE Histone H2B type 1-C/E/G OS=Mus musculus OX=10090 GN=H2	12	6	6	6	6	6	6	6	6	6	6	6	6	5	6	6	6	6	5	6	6	6	6	5	6	5	6	6	6	6	6	6	6	6	6	6	6	6	6	6	6
70	P10922	P10922	1	1	1	Histone H1.0;Histone H1.0, N-terminally processed	H1f0	sp|P10922|H10_MOUSE Histone H1.0 OS=Mus musculus OX=10090 GN=H1-0 PE=2 SV=4	1	1	1	1	0	1	1	0	1	1	0	0	0	0	0	0	0	0	0	0	0	1	0	1	1	0	0	1	0	1	0	1	1	0	1	0	0	0	1	1	0
71	P11031	P11031	1	1	1	Activated RNA polymerase II transcriptional coactivator p15	Sub1	sp|P11031|TCP4_MOUSE Activated RNA polymerase II transcriptional coactivator p15 OS=Mus musculus OX=10090 GN=Sub1 PE=1 SV=3	1	1	1	1	1	0	0	0	0	1	1	0	0	1	0	0	0	1	0	0	1	1	1	1	1	0	0	0	1	0	0	0	0	0	1	0	0	0	0	0	1
72	P11352	P11352	2	2	2	Glutathione peroxidase 1	Gpx1	sp|P11352|GPX1_MOUSE Glutathione peroxidase 1 OS=Mus musculus OX=10090 GN=Gpx1 PE=1 SV=2	1	2	2	2	0	0	0	0	1	0	0	0	0	0	0	0	1	0	1	0	0	0	0	1	0	1	0	1	0	0	0	0	1	0	1	0	0	0	0	1	0
73	P11499	P11499	17	17	10	Heat shock protein HSP 90-beta	Hsp90ab1	sp|P11499|HS90B_MOUSE Heat shock protein HSP 90-beta OS=Mus musculus OX=10090 GN=Hsp90ab1 PE=1 SV=3	1	17	17	10	9	9	13	11	10	9	9	11	10	10	8	11	8	12	9	10	11	14	11	11	6	12	10	11	11	11	8	8	10	13	10	9	9	10	9	10	10
74	P11679;CON__Q9H552;CON__P48668;CON__P04259;CON__P02538;CON__Q8VED5;CON__P13647;CON__Q9NSB2;CON__Q6ISB0;Q8VED5;Q3UV17;Q99M73;CON__H-INV:HIT000016045;CON__P07744;CON__P12035;CON__Q01546;P07744;CON__REFSEQ:XP_092267;CON__Q61726;CON__O43790;CON__Q6NT21;CON__P78385;CON__Q14533;CON__P78386;CON__Q14CN4-1;CON__Q6IME9;CON__Q8N1N4-2;CON__Q7RTT2;CON__Q7RTS7;CON__Q6NXH9;CON__Q32MB2;CON__Q7Z794;CON__P19013;CO…	P11679	35;7;4;4;4;3;3;3;3;3;3;3;2;2;2;2;2;1;1;1;1;1;1;1;1;1;1;1;1;1;1;1;1;1;1;1;1;1;1;1;1;1;1;1	35;7;4;4;4;3;3;3;3;3;3;3;2;2;2;2;2;1;1;1;1;1;1;1;1;1;1;1;1;1;1;1;1;1;1;1;1;1;1;1;1;1;1;1	15;1;0;0;0;0;0;0;0;0;0;0;0;0;0;0;0;0;0;0;0;0;0;0;0;0;0;0;0;0;0;0;0;0;0;0;0;0;0;0;0;0;0;0	Keratin, type II cytoskeletal 8	Krt8	sp|P11679|K2C8_MOUSE Keratin, type II cytoskeletal 8 OS=Mus musculus OX=10090 GN=Krt8 PE=1 SV=4	44	35	35	15	26	23	22	24	25	24	23	21	23	24	23	25	30	24	26	25	26	26	26	27	23	24	24	19	25	27	26	24	26	22	23	26	25	23	21	25	25
75	P11983	P11983	2	2	2	T-complex protein 1 subunit alpha	Tcp1	sp|P11983|TCPA_MOUSE T-complex protein 1 subunit alpha OS=Mus musculus OX=10090 GN=Tcp1 PE=1 SV=3	1	2	2	2	0	0	0	0	0	0	0	0	0	0	0	0	0	0	0	0	0	0	0	0	0	0	0	1	0	0	0	0	0	0	0	0	0	0	0	0	0
76	P12787	P12787	4	4	4	Cytochrome c oxidase subunit 5A, mitochondrial	Cox5a	sp|P12787|COX5A_MOUSE Cytochrome c oxidase subunit 5A, mitochondrial OS=Mus musculus OX=10090 GN=Cox5a PE=1 SV=2	1	4	4	4	3	4	3	2	1	1	1	2	3	2	3	2	2	3	3	4	3	3	4	2	3	3	3	3	2	3	2	3	3	0	3	2	2	2	3	3	3
77	P12970	P12970	3	3	3	60S ribosomal protein L7a	Rpl7a	sp|P12970|RL7A_MOUSE 60S ribosomal protein L7a OS=Mus musculus OX=10090 GN=Rpl7a PE=1 SV=2	1	3	3	3	0	0	0	1	1	0	0	0	0	0	1	0	1	0	0	0	1	1	1	1	1	0	0	1	0	0	1	0	0	0	0	0	1	0	0	0	0
78	P13634	P13634	12	12	12	Carbonic anhydrase 1	Ca1	sp|P13634|CAH1_MOUSE Carbonic anhydrase 1 OS=Mus musculus OX=10090 GN=Ca1 PE=1 SV=4	1	12	12	12	11	10	8	10	9	8	9	7	8	9	11	11	10	11	10	10	11	10	8	7	8	8	10	10	10	9	11	10	12	12	11	12	11	10	11	9	10
79	P14069	P14069	2	2	2	Protein S100-A6	S100a6	sp|P14069|S10A6_MOUSE Protein S100-A6 OS=Mus musculus OX=10090 GN=S100a6 PE=1 SV=3	1	2	2	2	2	2	1	1	2	2	2	2	1	2	2	1	1	2	2	2	2	2	2	1	2	1	2	0	2	1	1	1	2	2	1	2	1	2	2	2	2
80	P14094	P14094	3	3	3	Sodium/potassium-transporting ATPase subunit beta-1	Atp1b1	sp|P14094|AT1B1_MOUSE Sodium/potassium-transporting ATPase subunit beta-1 OS=Mus musculus OX=10090 GN=Atp1b1 PE=1 SV=1	1	3	3	3	1	3	1	2	1	1	2	2	3	3	1	3	3	2	2	1	1	1	2	1	2	1	3	1	1	1	2	2	3	3	1	2	3	2	2	1	2
81	P14115	P14115	2	2	2	60S ribosomal protein L27a	Rpl27a	sp|P14115|RL27A_MOUSE 60S ribosomal protein L27a OS=Mus musculus OX=10090 GN=Rpl27a PE=1 SV=5	1	2	2	2	2	1	0	0	2	1	2	2	0	1	2	1	0	1	1	1	2	1	1	1	0	1	2	1	1	2	2	0	2	2	0	1	2	2	2	1	2
82	P14131	P14131	5	5	5	40S ribosomal protein S16	Rps16	sp|P14131|RS16_MOUSE 40S ribosomal protein S16 OS=Mus musculus OX=10090 GN=Rps16 PE=1 SV=4	1	5	5	5	2	2	2	4	3	3	2	3	1	1	3	4	1	1	1	3	2	4	3	2	2	2	1	3	2	1	3	2	2	2	2	2	2	3	1	3	2
83	P14148	P14148	4	4	4	60S ribosomal protein L7	Rpl7	sp|P14148|RL7_MOUSE 60S ribosomal protein L7 OS=Mus musculus OX=10090 GN=Rpl7 PE=1 SV=2	1	4	4	4	2	2	1	0	0	2	1	1	0	0	1	2	1	1	2	1	2	2	1	2	1	3	2	2	1	1	1	0	1	0	2	0	1	1	0	3	3
84	P14152	P14152	6	6	6	Malate dehydrogenase, cytoplasmic	Mdh1	sp|P14152|MDHC_MOUSE Malate dehydrogenase, cytoplasmic OS=Mus musculus OX=10090 GN=Mdh1 PE=1 SV=3	1	6	6	6	3	2	3	3	4	4	3	3	3	2	4	4	5	4	3	6	4	4	3	4	2	2	3	3	4	2	2	5	2	3	2	4	4	3	4	2	2
85	P14206	P14206	7	7	7	40S ribosomal protein SA	Rpsa	sp|P14206|RSSA_MOUSE 40S ribosomal protein SA OS=Mus musculus OX=10090 GN=Rpsa PE=1 SV=4	1	7	7	7	2	3	0	2	1	1	3	2	1	3	4	4	4	3	2	3	1	3	3	2	3	3	3	3	3	2	4	2	5	3	1	3	4	3	2	4	3
86	P14211	P14211	8	8	8	Calreticulin	Calr	sp|P14211|CALR_MOUSE Calreticulin OS=Mus musculus OX=10090 GN=Calr PE=1 SV=1	1	8	8	8	1	3	3	2	2	2	2	1	3	4	3	3	3	1	1	5	3	2	2	3	2	1	2	1	4	3	3	3	3	2	2	3	5	2	3	3	3
87	P14733	P14733	4	3	3	Lamin-B1	Lmnb1	sp|P14733|LMNB1_MOUSE Lamin-B1 OS=Mus musculus OX=10090 GN=Lmnb1 PE=1 SV=3	1	4	3	3	0	1	0	0	0	0	0	0	0	0	0	0	0	0	0	0	0	0	1	1	0	0	0	1	0	0	1	0	0	0	0	0	1	0	0	1	0
88	P14869	P14869	5	5	5	60S acidic ribosomal protein P0	Rplp0	sp|P14869|RLA0_MOUSE 60S acidic ribosomal protein P0 OS=Mus musculus OX=10090 GN=Rplp0 PE=1 SV=3	1	5	5	5	2	3	3	1	2	2	4	2	1	2	2	2	3	1	2	2	1	0	0	0	1	2	0	1	1	2	1	2	1	1	2	3	3	2	1	0	2
89	P15532	P15532	5	2	2	Nucleoside diphosphate kinase A	Nme1	sp|P15532|NDKA_MOUSE Nucleoside diphosphate kinase A OS=Mus musculus OX=10090 GN=Nme1 PE=1 SV=1	1	5	2	2	2	4	2	2	1	2	1	2	3	1	3	2	1	2	1	2	2	3	2	2	1	1	3	0	2	1	2	2	1	2	2	1	3	1	1	4	3
90	P15626;Q80W21	P15626;Q80W21	5;4	2;1	2;1	Glutathione S-transferase Mu 2;Glutathione S-transferase Mu 7	Gstm2;Gstm7	sp|P15626|GSTM2_MOUSE Glutathione S-transferase Mu 2 OS=Mus musculus OX=10090 GN=Gstm2 PE=1 SV=2;sp|Q80W21|GSTM7_MOUSE Glutathione S-transferase Mu 7 OS=Mus musculus OX=10090 GN=Gstm7 PE=1 SV=1	2	5	2	2	3	2	1	3	2	1	4	1	2	3	1	2	1	2	2	3	1	5	3	4	3	1	1	2	2	2	2	1	2	3	2	1	3	3	1	3	3
91	P15864;Q07133	P15864	4;1	4;1	1;0	Histone H1.2	Hist1h1c	sp|P15864|H12_MOUSE Histone H1.2 OS=Mus musculus OX=10090 GN=H1-2 PE=1 SV=2	2	4	4	1	4	4	3	4	4	4	4	4	4	3	4	3	3	4	2	3	4	4	3	4	3	2	3	4	3	4	4	4	3	4	4	4	4	4	3	2	3
92	P15947;P15945	P15947;P15945	2;1	2;1	2;1	Kallikrein-1;Kallikrein 1-related peptidase b5	Klk1;Klk1b5	sp|P15947|KLK1_MOUSE Kallikrein-1 OS=Mus musculus OX=10090 GN=Klk1 PE=1 SV=3;sp|P15945|K1KB5_MOUSE Kallikrein 1-related peptidase b5 OS=Mus musculus OX=10090 GN=Klk1b5 PE=2 SV=1	2	2	2	2	0	1	0	1	0	1	1	0	1	0	0	1	1	1	2	2	1	1	0	1	2	0	1	0	0	1	0	1	1	1	0	2	0	1	1	1	2
93	P16015	P16015	4	4	4	Carbonic anhydrase 3	Ca3	sp|P16015|CAH3_MOUSE Carbonic anhydrase 3 OS=Mus musculus OX=10090 GN=Ca3 PE=1 SV=3	1	4	4	4	1	0	0	0	1	0	0	0	0	0	0	0	0	0	1	0	0	0	0	0	0	0	0	0	0	1	0	1	2	0	1	1	0	0	0	0	0
94	P16110	P16110	6	6	6	Galectin-3	Lgals3	sp|P16110|LEG3_MOUSE Galectin-3 OS=Mus musculus OX=10090 GN=Lgals3 PE=1 SV=3	1	6	6	6	4	3	4	5	4	1	3	4	3	5	2	3	4	5	5	4	2	3	4	4	3	3	4	3	2	3	3	4	1	2	2	4	4	4	3	3	3
95	Q62095;P16381;Q62167	Q62095;P16381;Q62167	3;3;3	3;3;3	2;2;2	ATP-dependent RNA helicase DDX3Y;Putative ATP-dependent RNA helicase Pl10;ATP-dependent RNA helicase DDX3X	Ddx3y;D1Pas1;Ddx3x	sp|Q62095|DDX3Y_MOUSE ATP-dependent RNA helicase DDX3Y OS=Mus musculus OX=10090 GN=Ddx3y PE=1 SV=2;sp|P16381|DDX3L_MOUSE Putative ATP-dependent RNA helicase Pl10 OS=Mus musculus OX=10090 GN=D1Pas1 PE=1 SV=1;sp|Q62167|DDX3X_MOUSE ATP-dependent RNA helicase	3	3	3	2	0	0	0	0	0	0	0	0	0	0	0	0	0	0	0	0	0	0	0	0	0	1	0	0	0	1	0	0	1	1	1	0	0	0	0	0	0
96	P16858	P16858	11	11	10	Glyceraldehyde-3-phosphate dehydrogenase	Gapdh	sp|P16858|G3P_MOUSE Glyceraldehyde-3-phosphate dehydrogenase OS=Mus musculus OX=10090 GN=Gapdh PE=1 SV=2	1	11	11	10	7	9	8	7	7	6	5	5	6	6	5	7	5	4	7	5	6	5	8	6	5	6	7	5	8	7	6	6	6	6	4	4	5	5	6	6	6
97	P17182;P17183;P21550	P17182	11;2;1	11;2;1	11;2;1	Alpha-enolase	Eno1	sp|P17182|ENOA_MOUSE Alpha-enolase OS=Mus musculus OX=10090 GN=Eno1 PE=1 SV=3	3	11	11	11	5	9	6	3	7	6	7	7	5	7	6	8	4	6	6	6	6	6	6	7	7	5	8	4	4	6	6	10	8	8	7	9	8	6	7	7	7
98	P17225	P17225	4	4	4	Polypyrimidine tract-binding protein 1	Ptbp1	sp|P17225|PTBP1_MOUSE Polypyrimidine tract-binding protein 1 OS=Mus musculus OX=10090 GN=Ptbp1 PE=1 SV=2	1	4	4	4	0	0	0	1	0	0	0	0	0	0	1	0	1	0	0	0	0	0	1	0	0	0	0	0	0	0	0	0	0	0	0	0	0	0	0	0	0
99	P17563;Q63836	P17563;Q63836	16;12	16;12	16;12	Selenium-binding protein 1;Selenium-binding protein 2	Selenbp1;Selenbp2	sp|P17563|SBP1_MOUSE Methanethiol oxidase OS=Mus musculus OX=10090 GN=Selenbp1 PE=1 SV=2;sp|Q63836|SBP2_MOUSE Selenium-binding protein 2 OS=Mus musculus OX=10090 GN=Selenbp2 PE=1 SV=2	2	16	16	16	12	10	9	9	9	10	9	11	10	12	7	8	8	8	6	7	9	10	10	10	8	7	11	8	6	4	7	9	8	8	5	11	9	5	10	7	6
100	P17742	P17742	6	6	6	Peptidyl-prolyl cis-trans isomerase A;Peptidyl-prolyl cis-trans isomerase A, N-terminally processed	Ppia	sp|P17742|PPIA_MOUSE Peptidyl-prolyl cis-trans isomerase A OS=Mus musculus OX=10090 GN=Ppia PE=1 SV=2	1	6	6	6	5	4	4	5	5	6	5	6	3	4	4	5	4	4	4	5	4	6	5	5	5	3	5	3	4	3	4	5	4	5	4	4	5	5	4	2	6
101	P17751	P17751	6	6	6	Triosephosphate isomerase	Tpi1	sp|P17751|TPIS_MOUSE Triosephosphate isomerase OS=Mus musculus OX=10090 GN=Tpi1 PE=1 SV=4	1	6	6	6	3	2	4	3	2	4	4	2	3	3	2	3	3	3	5	3	3	3	4	2	4	2	2	4	5	4	4	1	4	3	4	2	2	1	4	1	2
102	P18572	P18572	3	3	3	Basigin	Bsg	sp|P18572|BASI_MOUSE Basigin OS=Mus musculus OX=10090 GN=Bsg PE=1 SV=2	1	3	3	3	0	0	0	0	1	1	0	0	1	0	0	0	0	0	1	0	0	1	1	0	0	0	0	0	0	0	0	0	0	1	0	0	0	0	0	0	0
103	P18760;P45591	P18760	5;1	5;1	5;1	Cofilin-1	Cfl1	sp|P18760|COF1_MOUSE Cofilin-1 OS=Mus musculus OX=10090 GN=Cfl1 PE=1 SV=3	2	5	5	5	2	3	4	2	2	2	2	2	4	2	2	1	1	1	4	3	3	2	3	3	2	2	3	4	4	2	3	2	3	3	3	3	3	3	4	2	4
104	P19137	P19137	1	1	1	Laminin subunit alpha-1	Lama1	sp|P19137|LAMA1_MOUSE Laminin subunit alpha-1 OS=Mus musculus OX=10090 GN=Lama1 PE=1 SV=2	1	1	1	1	0	0	0	0	0	0	0	1	0	0	0	1	0	0	0	0	0	0	0	0	0	0	0	1	0	0	0	1	0	0	0	0	0	0	0	0	0
105	P19157;P46425	P19157;P46425	7;4	7;4	7;4	Glutathione S-transferase P 1;Glutathione S-transferase P 2	Gstp1;Gstp2	sp|P19157|GSTP1_MOUSE Glutathione S-transferase P 1 OS=Mus musculus OX=10090 GN=Gstp1 PE=1 SV=2;sp|P46425|GSTP2_MOUSE Glutathione S-transferase P 2 OS=Mus musculus OX=10090 GN=Gstp2 PE=1 SV=2	2	7	7	7	5	4	4	1	3	5	3	5	4	2	5	3	3	3	5	6	4	4	5	5	3	4	3	4	5	2	3	4	4	4	5	4	4	5	4	5	3
106	P19253	P19253	4	4	4	60S ribosomal protein L13a	Rpl13a	sp|P19253|RL13A_MOUSE 60S ribosomal protein L13a OS=Mus musculus OX=10090 GN=Rpl13a PE=1 SV=4	1	4	4	4	1	1	0	0	1	0	0	0	1	1	0	0	0	1	0	1	0	1	0	0	0	0	0	0	0	0	0	1	0	1	0	0	0	0	0	1	1
107	P19536	P19536	3	3	3	Cytochrome c oxidase subunit 5B, mitochondrial	Cox5b	sp|P19536|COX5B_MOUSE Cytochrome c oxidase subunit 5B, mitochondrial OS=Mus musculus OX=10090 GN=Cox5b PE=1 SV=1	1	3	3	3	3	1	2	3	3	2	2	1	2	2	2	2	1	1	0	2	1	2	1	3	1	2	2	2	3	2	0	2	2	0	3	2	2	2	2	1	3
108	P19783	P19783	5	5	5	Cytochrome c oxidase subunit 4 isoform 1, mitochondrial	Cox4i1	sp|P19783|COX41_MOUSE Cytochrome c oxidase subunit 4 isoform 1, mitochondrial OS=Mus musculus OX=10090 GN=Cox4i1 PE=1 SV=2	1	5	5	5	2	3	3	2	3	3	1	2	2	2	0	3	3	3	3	1	2	2	3	3	3	3	1	2	2	2	3	2	3	3	3	3	1	4	2	3	3
109	P20029	P20029	21	21	19	78 kDa glucose-regulated protein	Hspa5	sp|P20029|BIP_MOUSE Endoplasmic reticulum chaperone BiP OS=Mus musculus OX=10090 GN=Hspa5 PE=1 SV=3	1	21	21	19	10	10	9	13	10	9	14	10	12	13	14	14	12	10	15	16	16	9	11	11	11	12	12	10	13	12	11	9	11	10	13	15	15	15	13	11	14
110	P20108	P20108	3	3	3	Thioredoxin-dependent peroxide reductase, mitochondrial	Prdx3	sp|P20108|PRDX3_MOUSE Thioredoxin-dependent peroxide reductase, mitochondrial OS=Mus musculus OX=10090 GN=Prdx3 PE=1 SV=1	1	3	3	3	1	1	1	0	0	0	0	0	0	1	1	0	0	0	0	0	0	1	1	0	0	1	0	0	1	0	1	1	1	0	0	1	1	0	0	0	0
111	P20152;P46660;P08551;P19246	P20152	9;1;1;1	5;0;0;0	5;0;0;0	Vimentin	Vim	sp|P20152|VIME_MOUSE Vimentin OS=Mus musculus OX=10090 GN=Vim PE=1 SV=3	4	9	5	5	2	3	5	3	2	4	3	1	1	2	2	2	5	2	2	2	3	3	4	5	4	3	4	2	3	4	5	2	3	2	5	6	5	3	2	3	5
112	P21107	P21107	6	4	4	Tropomyosin alpha-3 chain	Tpm3	sp|P21107|TPM3_MOUSE Tropomyosin alpha-3 chain OS=Mus musculus OX=10090 GN=Tpm3 PE=1 SV=3	1	6	4	4	2	1	3	1	1	2	2	3	3	4	3	2	4	3	2	3	1	2	2	3	3	3	4	3	2	3	4	3	2	3	2	2	3	3	3	2	3
113	P21619	P21619	3	2	2	Lamin-B2	Lmnb2	sp|P21619|LMNB2_MOUSE Lamin-B2 OS=Mus musculus OX=10090 GN=Lmnb2 PE=1 SV=2	1	3	2	2	0	1	0	0	0	0	0	0	0	1	0	0	0	0	0	0	0	0	0	1	0	0	0	0	0	0	0	0	0	0	0	0	0	0	0	0	0
114	P23492	P23492	3	3	3	Purine nucleoside phosphorylase	Pnp	sp|P23492|PNPH_MOUSE Purine nucleoside phosphorylase OS=Mus musculus OX=10090 GN=Pnp PE=1 SV=2	1	3	3	3	0	0	0	0	0	1	0	0	0	0	0	0	0	0	0	1	1	0	0	1	0	0	1	0	0	0	1	1	0	0	1	0	0	0	0	0	0
115	P23953	P23953	2	2	2	Carboxylesterase 1C	Ces1c	sp|P23953|EST1C_MOUSE Carboxylesterase 1C OS=Mus musculus OX=10090 GN=Ces1c PE=1 SV=4	1	2	2	2	0	0	0	0	0	0	0	0	0	0	0	0	0	0	0	0	0	0	0	0	0	0	0	0	0	0	0	0	0	0	0	0	0	0	0	0	1
116	P24369	P24369	6	6	6	Peptidyl-prolyl cis-trans isomerase B	Ppib	sp|P24369|PPIB_MOUSE Peptidyl-prolyl cis-trans isomerase B OS=Mus musculus OX=10090 GN=Ppib PE=1 SV=2	1	6	6	6	3	3	4	5	3	3	3	2	3	2	4	2	3	3	3	3	3	4	3	2	2	2	4	6	4	2	3	3	2	3	2	3	2	5	2	3	4
117	P24549;O35945	P24549;O35945	5;3	4;2	4;2	Retinal dehydrogenase 1;Aldehyde dehydrogenase, cytosolic 1	Aldh1a1;Aldh1a7	sp|P24549|AL1A1_MOUSE Retinal dehydrogenase 1 OS=Mus musculus OX=10090 GN=Aldh1a1 PE=1 SV=5;sp|O35945|AL1A7_MOUSE Aldehyde dehydrogenase, cytosolic 1 OS=Mus musculus OX=10090 GN=Aldh1a7 PE=1 SV=1	2	5	4	4	0	1	1	1	0	1	1	1	1	1	2	2	1	1	1	1	1	1	1	1	1	1	1	1	2	1	1	1	1	1	1	1	1	1	1	1	1
118	P25444	P25444	4	4	4	40S ribosomal protein S2	Rps2	sp|P25444|RS2_MOUSE 40S ribosomal protein S2 OS=Mus musculus OX=10090 GN=Rps2 PE=1 SV=3	1	4	4	4	2	3	0	1	3	2	1	1	1	2	3	2	2	1	2	1	2	1	2	2	2	1	1	1	2	3	1	2	3	0	0	3	1	3	2	2	2
119	P26040;P26041;P26043	P26040;P26041;P26043	6;3;3	6;3;3	6;3;3	Ezrin;Moesin;Radixin	Ezr;Msn;Rdx	sp|P26040|EZRI_MOUSE Ezrin OS=Mus musculus OX=10090 GN=Ezr PE=1 SV=3;sp|P26041|MOES_MOUSE Moesin OS=Mus musculus OX=10090 GN=Msn PE=1 SV=3;sp|P26043|RADI_MOUSE Radixin OS=Mus musculus OX=10090 GN=Rdx PE=1 SV=3	3	6	6	6	1	2	0	1	1	1	1	2	2	1	1	2	2	2	2	1	1	3	4	1	2	1	2	1	1	1	2	1	1	2	1	2	2	0	1	1	2
120	P26231	P26231	3	3	3	Catenin alpha-1	Ctnna1	sp|P26231|CTNA1_MOUSE Catenin alpha-1 OS=Mus musculus OX=10090 GN=Ctnna1 PE=1 SV=1	1	3	3	3	0	1	0	0	0	0	1	0	0	0	1	0	0	0	0	0	0	0	0	0	0	1	0	0	0	0	0	0	0	1	2	0	0	0	1	0	0
121	P26350	P26350	1	1	1	Prothymosin alpha;Prothymosin alpha, N-terminally processed;Thymosin alpha	Ptma	sp|P26350|PTMA_MOUSE Prothymosin alpha OS=Mus musculus OX=10090 GN=Ptma PE=1 SV=2	1	1	1	1	1	1	1	1	1	0	1	1	1	1	1	1	1	1	0	1	1	1	1	1	1	1	0	1	1	1	1	1	1	1	1	0	1	1	1	1	1
122	P26443	P26443	4	4	4	Glutamate dehydrogenase 1, mitochondrial	Glud1	sp|P26443|DHE3_MOUSE Glutamate dehydrogenase 1, mitochondrial OS=Mus musculus OX=10090 GN=Glud1 PE=1 SV=1	1	4	4	4	2	1	1	1	2	2	2	1	3	0	1	0	2	1	2	2	1	3	2	2	2	0	1	1	2	1	0	3	0	0	2	0	2	1	1	1	0
123	P26883	P26883	1	1	1	Peptidyl-prolyl cis-trans isomerase FKBP1A	Fkbp1a	sp|P26883|FKB1A_MOUSE Peptidyl-prolyl cis-trans isomerase FKBP1A OS=Mus musculus OX=10090 GN=Fkbp1a PE=1 SV=2	1	1	1	1	1	1	1	0	1	0	0	0	0	0	0	0	1	1	1	0	0	0	0	1	0	1	1	1	0	0	1	1	0	0	0	1	1	1	0	1	0
124	P27773	P27773	20	20	20	Protein disulfide-isomerase A3	Pdia3	sp|P27773|PDIA3_MOUSE Protein disulfide-isomerase A3 OS=Mus musculus OX=10090 GN=Pdia3 PE=1 SV=2	1	20	20	20	9	13	11	13	11	14	15	14	12	13	13	9	11	12	13	10	12	13	15	11	10	13	11	11	11	11	14	14	14	12	11	14	15	10	9	13	8
125	P29341	P29341	2	2	2	Polyadenylate-binding protein 1	Pabpc1	sp|P29341|PABP1_MOUSE Polyadenylate-binding protein 1 OS=Mus musculus OX=10090 GN=Pabpc1 PE=1 SV=2	1	2	2	2	0	1	0	0	0	0	1	0	0	1	0	0	0	0	1	0	1	1	1	0	1	1	0	1	1	2	2	0	0	1	0	1	0	0	1	1	0
126	P62880;P62874;P29387;Q61011	P62880;P62874;P29387;Q61011	2;2;2;1	2;2;2;1	2;2;2;1	Guanine nucleotide-binding protein G(I)/G(S)/G(T) subunit beta-2;Guanine nucleotide-binding protein G(I)/G(S)/G(T) subunit beta-1;Guanine nucleotide-binding protein subunit beta-4;Guanine nucleotide-binding protein G(I)/G(S)/G(T) subunit beta-3	Gnb2;Gnb1;Gnb4;Gnb3	sp|P62880|GBB2_MOUSE Guanine nucleotide-binding protein G(I)/G(S)/G(T) subunit beta-2 OS=Mus musculus OX=10090 GN=Gnb2 PE=1 SV=3;sp|P62874|GBB1_MOUSE Guanine nucleotide-binding protein G(I)/G(S)/G(T) subunit beta-1 OS=Mus musculus OX=10090 GN=Gnb1 PE=1 SV=	4	2	2	2	1	2	1	0	0	1	0	0	1	0	0	0	2	0	1	0	0	0	1	1	1	0	0	2	1	1	0	1	0	2	1	1	2	0	0	0	1
127	P29391;P49945	P29391;P49945	3;2	3;2	3;2	Ferritin light chain 1;Ferritin light chain 2	Ftl1;Ftl2	sp|P29391|FRIL1_MOUSE Ferritin light chain 1 OS=Mus musculus OX=10090 GN=Ftl1 PE=1 SV=2;sp|P49945|FRIL2_MOUSE Ferritin light chain 2 OS=Mus musculus OX=10090 GN=Ftl2 PE=3 SV=2	2	3	3	3	0	0	0	0	0	0	0	0	0	0	0	0	0	0	0	0	1	0	0	0	0	0	1	0	0	0	0	0	0	1	1	1	1	0	0	0	0
128	P29452	P29452	2	2	2	Caspase-1;Caspase-1 subunit p20;Caspase-1 subunit p10	Casp1	sp|P29452|CASP1_MOUSE Caspase-1 OS=Mus musculus OX=10090 GN=Casp1 PE=1 SV=1	1	2	2	2	1	0	0	0	0	0	1	0	0	0	0	0	0	0	0	0	0	0	0	0	0	0	0	0	0	0	0	0	0	0	0	0	0	0	1	0	0
129	P29758	P29758	4	4	4	Ornithine aminotransferase, mitochondrial	Oat	sp|P29758|OAT_MOUSE Ornithine aminotransferase, mitochondrial OS=Mus musculus OX=10090 GN=Oat PE=1 SV=1	1	4	4	4	0	2	0	1	2	1	2	1	2	0	1	3	2	2	1	1	1	1	0	0	1	0	0	2	1	1	0	1	1	1	2	1	2	1	2	1	1
130	P30275;Q6P8J7	P30275	9;1	9;1	9;1	Creatine kinase U-type, mitochondrial	Ckmt1	sp|P30275|KCRU_MOUSE Creatine kinase U-type, mitochondrial OS=Mus musculus OX=10090 GN=Ckmt1 PE=1 SV=1	2	9	9	9	8	6	7	6	8	6	6	6	7	4	5	6	4	7	6	4	6	5	7	8	6	6	6	5	5	5	6	4	8	6	6	8	4	7	5	8	5
131	P30999	P30999	1	1	1	Catenin delta-1	Ctnnd1	sp|P30999|CTND1_MOUSE Catenin delta-1 OS=Mus musculus OX=10090 GN=Ctnnd1 PE=1 SV=2	1	1	1	1	0	1	0	0	0	0	0	1	0	0	0	0	0	0	0	1	0	0	0	0	0	1	0	0	0	0	1	0	1	0	1	0	0	0	1	0	0
132	P31001	P31001	10	9	7	Desmin	Des	sp|P31001|DESM_MOUSE Desmin OS=Mus musculus OX=10090 GN=Des PE=1 SV=3	1	10	9	7	1	2	3	2	2	3	2	1	2	2	1	1	3	1	1	1	2	5	4	3	3	3	6	3	1	5	5	1	2	1	4	2	2	2	2	2	5
133	P31725	P31725	1	1	1	Protein S100-A9	S100a9	sp|P31725|S10A9_MOUSE Protein S100-A9 OS=Mus musculus OX=10090 GN=S100a9 PE=1 SV=3	1	1	1	1	0	0	0	0	0	0	1	0	0	0	0	0	0	0	0	0	0	0	0	0	1	0	1	0	0	1	1	0	0	0	0	1	0	0	0	1	0
134	P31786	P31786	2	2	2	Acyl-CoA-binding protein	Dbi	sp|P31786|ACBP_MOUSE Acyl-CoA-binding protein OS=Mus musculus OX=10090 GN=Dbi PE=1 SV=2	1	2	2	2	0	1	0	1	0	1	0	0	2	1	2	0	2	2	0	0	2	1	1	1	1	2	1	0	0	1	1	0	0	0	1	1	1	1	1	2	0
135	P32921	P32921	2	2	2	Tryptophan--tRNA ligase, cytoplasmic;T1-TrpRS;T2-TrpRS	Wars	sp|P32921|SYWC_MOUSE Tryptophan--tRNA ligase, cytoplasmic OS=Mus musculus OX=10090 GN=Wars1 PE=1 SV=2	1	2	2	2	0	1	0	0	0	0	0	0	1	0	1	0	1	0	0	0	0	0	0	0	0	0	0	0	0	0	0	0	0	0	0	0	1	1	0	0	1
136	P34884	P34884	2	2	2	Macrophage migration inhibitory factor	Mif	sp|P34884|MIF_MOUSE Macrophage migration inhibitory factor OS=Mus musculus OX=10090 GN=Mif PE=1 SV=2	1	2	2	2	0	0	1	1	0	1	1	0	1	1	1	0	1	0	1	1	0	0	0	1	0	1	1	0	0	0	1	1	0	1	1	0	1	1	1	1	1
137	P61294;P35279;Q8BHD0	P61294;P35279;Q8BHD0	2;2;1	2;2;1	2;2;1	Ras-related protein Rab-6B;Ras-related protein Rab-6A;Ras-related protein Rab-39A	Rab6b;Rab6a;Rab39a	sp|P61294|RAB6B_MOUSE Ras-related protein Rab-6B OS=Mus musculus OX=10090 GN=Rab6b PE=1 SV=1;sp|P35279|RAB6A_MOUSE Ras-related protein Rab-6A OS=Mus musculus OX=10090 GN=Rab6a PE=1 SV=4;sp|Q8BHD0|RB39A_MOUSE Ras-related protein Rab-39A OS=Mus musculus OX=1	3	2	2	2	0	1	1	1	0	1	1	1	1	1	1	1	1	1	1	1	1	1	1	1	1	1	1	1	1	1	0	1	1	2	1	0	1	1	2	1	1
138	P35486	P35486	2	2	2	Pyruvate dehydrogenase E1 component subunit alpha, somatic form, mitochondrial	Pdha1	sp|P35486|ODPA_MOUSE Pyruvate dehydrogenase E1 component subunit alpha, somatic form, mitochondrial OS=Mus musculus OX=10090 GN=Pdha1 PE=1 SV=1	1	2	2	2	1	0	0	0	0	0	0	0	0	0	1	0	0	0	0	1	0	1	1	0	0	0	0	0	0	1	0	1	0	0	0	0	0	1	1	0	0
139	P35564	P35564	3	3	3	Calnexin	Canx	sp|P35564|CALX_MOUSE Calnexin OS=Mus musculus OX=10090 GN=Canx PE=1 SV=1	1	3	3	3	0	0	1	1	0	0	0	0	1	0	2	0	0	1	0	1	0	0	0	0	0	0	2	1	1	1	0	2	0	1	0	0	0	1	0	0	0
140	P35700	P35700	9	9	8	Peroxiredoxin-1	Prdx1	sp|P35700|PRDX1_MOUSE Peroxiredoxin-1 OS=Mus musculus OX=10090 GN=Prdx1 PE=1 SV=1	1	9	9	8	7	8	7	7	7	5	6	7	5	7	5	6	7	7	7	6	6	6	6	8	5	6	4	7	7	6	5	6	6	8	8	7	8	8	6	6	6
141	P35979	P35979	2	2	2	60S ribosomal protein L12	Rpl12	sp|P35979|RL12_MOUSE 60S ribosomal protein L12 OS=Mus musculus OX=10090 GN=Rpl12 PE=1 SV=2	1	2	2	2	0	0	1	0	0	0	1	0	0	1	1	0	1	1	0	0	0	0	0	1	1	0	0	0	0	0	0	0	1	1	0	0	0	0	0	0	1
142	P35980	P35980	3	3	3	60S ribosomal protein L18	Rpl18	sp|P35980|RL18_MOUSE 60S ribosomal protein L18 OS=Mus musculus OX=10090 GN=Rpl18 PE=1 SV=3	1	3	3	3	1	0	1	0	0	0	1	1	1	1	1	1	1	1	0	0	1	1	1	2	0	1	0	1	1	1	2	1	1	1	0	1	0	0	1	0	1
143	P37804	P37804	12	12	12	Transgelin	Tagln	sp|P37804|TAGL_MOUSE Transgelin OS=Mus musculus OX=10090 GN=Tagln PE=1 SV=3	1	12	12	12	5	5	6	7	5	6	2	2	6	6	8	9	6	9	5	6	6	8	8	9	9	7	8	6	9	8	8	9	6	7	9	11	9	7	5	8	7
144	P38647	P38647	9	9	9	Stress-70 protein, mitochondrial	Hspa9	sp|P38647|GRP75_MOUSE Stress-70 protein, mitochondrial OS=Mus musculus OX=10090 GN=Hspa9 PE=1 SV=3	1	9	9	9	5	1	2	3	1	1	2	2	2	3	3	3	3	0	2	4	3	1	1	3	1	2	3	3	2	1	1	3	2	2	2	3	3	2	2	1	2
145	P40124	P40124	3	3	3	Adenylyl cyclase-associated protein 1	Cap1	sp|P40124|CAP1_MOUSE Adenylyl cyclase-associated protein 1 OS=Mus musculus OX=10090 GN=Cap1 PE=1 SV=4	1	3	3	3	0	0	1	0	1	0	0	1	0	0	0	0	0	0	1	0	1	0	0	0	0	0	0	0	0	0	1	0	0	0	0	0	1	1	0	0	0
146	P40142	P40142	13	13	13	Transketolase	Tkt	sp|P40142|TKT_MOUSE Transketolase OS=Mus musculus OX=10090 GN=Tkt PE=1 SV=1	1	13	13	13	5	5	6	4	0	5	7	4	4	5	5	5	3	5	6	5	6	7	2	6	4	4	2	5	5	5	4	4	4	5	3	3	3	3	4	2	3
147	P42125	P42125	4	4	4	Enoyl-CoA delta isomerase 1, mitochondrial	Eci1	sp|P42125|ECI1_MOUSE Enoyl-CoA delta isomerase 1, mitochondrial OS=Mus musculus OX=10090 GN=Eci1 PE=1 SV=2	1	4	4	4	0	1	0	1	0	0	1	0	0	1	0	0	0	1	0	0	1	0	0	1	0	0	0	1	0	1	0	1	0	0	0	0	0	0	0	0	0
148	P42225	P42225	1	1	1	Signal transducer and activator of transcription 1	Stat1	sp|P42225|STAT1_MOUSE Signal transducer and activator of transcription 1 OS=Mus musculus OX=10090 GN=Stat1 PE=1 SV=1	1	1	1	1	0	0	0	0	0	0	0	0	0	0	0	0	0	0	0	0	0	0	0	0	1	0	0	0	0	0	0	1	0	0	0	0	0	0	0	0	0
149	P42932	P42932	6	6	6	T-complex protein 1 subunit theta	Cct8	sp|P42932|TCPQ_MOUSE T-complex protein 1 subunit theta OS=Mus musculus OX=10090 GN=Cct8 PE=1 SV=3	1	6	6	6	1	0	1	1	2	1	0	1	0	2	0	1	2	0	0	0	1	0	1	2	0	0	1	1	1	0	1	1	1	2	0	1	0	0	0	2	2
150	P43274	P43274	4	2	2	Histone H1.4	Hist1h1e	sp|P43274|H14_MOUSE Histone H1.4 OS=Mus musculus OX=10090 GN=H1-4 PE=1 SV=2	1	4	2	2	3	3	2	4	3	4	4	4	4	3	4	3	4	3	2	3	4	4	3	4	3	3	2	3	4	4	4	4	3	3	3	3	3	3	4	3	4
151	P43275	P43275	2	1	1	Histone H1.1	Hist1h1a	sp|P43275|H11_MOUSE Histone H1.1 OS=Mus musculus OX=10090 GN=H1-1 PE=1 SV=2	1	2	1	1	1	1	1	1	1	1	2	1	1	0	1	1	1	1	0	1	1	1	1	1	1	0	0	2	1	2	1	1	0	1	1	1	1	1	2	0	1
152	P43276	P43276	4	4	4	Histone H1.5	Hist1h1b	sp|P43276|H15_MOUSE Histone H1.5 OS=Mus musculus OX=10090 GN=H1-5 PE=1 SV=2	1	4	4	4	2	3	3	3	2	4	3	2	3	3	2	2	3	3	3	1	1	3	3	3	4	3	2	2	3	2	3	3	3	4	3	2	4	2	4	3	2
153	P43277	P43277	4	1	1	Histone H1.3	Hist1h1d	sp|P43277|H13_MOUSE Histone H1.3 OS=Mus musculus OX=10090 GN=H1-3 PE=1 SV=2	1	4	1	1	4	3	3	4	4	3	4	3	4	3	4	3	3	4	2	3	4	4	4	4	4	3	3	4	3	4	4	4	3	4	4	4	4	4	3	2	3
154	P45376	P45376	5	5	5	Aldose reductase	Akr1b1	sp|P45376|ALDR_MOUSE Aldo-keto reductase family 1 member B1 OS=Mus musculus OX=10090 GN=Akr1b1 PE=1 SV=3	1	5	5	5	1	0	2	2	2	2	1	1	1	2	0	0	0	2	0	2	0	1	2	1	1	0	1	0	0	1	2	1	2	1	1	2	0	1	0	2	1
155	P45878	P45878	1	1	1	Peptidyl-prolyl cis-trans isomerase FKBP2	Fkbp2	sp|P45878|FKBP2_MOUSE Peptidyl-prolyl cis-trans isomerase FKBP2 OS=Mus musculus OX=10090 GN=Fkbp2 PE=1 SV=1	1	1	1	1	1	0	1	1	1	0	0	1	1	0	0	0	0	1	0	1	1	1	1	1	0	0	0	0	1	0	0	0	1	0	1	0	0	0	1	1	1
156	P45952	P45952	4	4	4	Medium-chain specific acyl-CoA dehydrogenase, mitochondrial	Acadm	sp|P45952|ACADM_MOUSE Medium-chain specific acyl-CoA dehydrogenase, mitochondrial OS=Mus musculus OX=10090 GN=Acadm PE=1 SV=1	1	4	4	4	2	1	0	0	1	1	1	1	0	1	0	0	1	1	0	0	1	0	1	0	1	0	0	0	2	0	0	0	0	2	0	0	0	0	0	0	1
157	P62492;P46638	P62492;P46638	3;3	3;3	3;3	Ras-related protein Rab-11A;Ras-related protein Rab-11B	Rab11a;Rab11b	sp|P62492|RB11A_MOUSE Ras-related protein Rab-11A OS=Mus musculus OX=10090 GN=Rab11a PE=1 SV=3;sp|P46638|RB11B_MOUSE Ras-related protein Rab-11B OS=Mus musculus OX=10090 GN=Rab11b PE=1 SV=3	2	3	3	3	0	1	2	2	1	1	2	2	0	0	1	1	1	1	0	1	0	0	2	1	1	1	0	1	0	0	0	1	0	1	0	1	2	1	0	0	2
158	P47738;Q9JHW9	P47738	15;1	15;1	14;0	Aldehyde dehydrogenase, mitochondrial	Aldh2	sp|P47738|ALDH2_MOUSE Aldehyde dehydrogenase, mitochondrial OS=Mus musculus OX=10090 GN=Aldh2 PE=1 SV=1	2	15	15	14	6	6	7	7	6	11	7	9	8	7	7	5	9	6	6	8	6	6	9	8	10	10	7	8	6	6	8	7	8	6	7	5	6	5	10	6	6
159	P47754;P47753	P47754	3;1	3;1	3;1	F-actin-capping protein subunit alpha-2	Capza2	sp|P47754|CAZA2_MOUSE F-actin-capping protein subunit alpha-2 OS=Mus musculus OX=10090 GN=Capza2 PE=1 SV=3	2	3	3	3	0	2	0	1	1	1	0	0	0	0	1	0	0	0	0	1	1	0	1	0	0	0	0	0	1	0	1	0	0	0	0	0	0	0	1	0	0
160	P47757	P47757	2	2	2	F-actin-capping protein subunit beta	Capzb	sp|P47757|CAPZB_MOUSE F-actin-capping protein subunit beta OS=Mus musculus OX=10090 GN=Capzb PE=1 SV=3	1	2	2	2	0	0	0	0	0	0	0	1	0	0	0	0	1	0	0	0	0	1	0	0	0	0	0	0	1	0	1	1	0	0	0	0	0	0	0	1	0
161	P47856;Q9Z2Z9	P47856	11;3	11;3	11;3	Glutamine--fructose-6-phosphate aminotransferase [isomerizing] 1	Gfpt1	sp|P47856|GFPT1_MOUSE Glutamine--fructose-6-phosphate aminotransferase [isomerizing] 1 OS=Mus musculus OX=10090 GN=Gfpt1 PE=1 SV=3	2	11	11	11	3	5	4	4	4	3	7	4	6	5	5	5	3	5	2	3	4	5	6	7	4	6	6	2	3	4	2	4	4	8	3	6	4	2	5	2	4
162	P47911	P47911	5	5	5	60S ribosomal protein L6	Rpl6	sp|P47911|RL6_MOUSE 60S ribosomal protein L6 OS=Mus musculus OX=10090 GN=Rpl6 PE=1 SV=3	1	5	5	5	1	2	1	1	0	1	1	0	1	1	1	2	2	1	1	1	1	0	2	2	0	1	0	0	0	0	0	0	0	2	0	0	0	1	1	2	2
163	P47955	P47955	1	1	1	60S acidic ribosomal protein P1	Rplp1	sp|P47955|RLA1_MOUSE 60S acidic ribosomal protein P1 OS=Mus musculus OX=10090 GN=Rplp1 PE=1 SV=1	1	1	1	1	0	0	0	1	1	1	0	1	0	0	0	1	1	0	0	0	0	1	0	0	0	1	1	0	0	0	0	0	0	0	1	0	0	0	1	0	0
164	P47963	P47963	5	5	5	60S ribosomal protein L13	Rpl13	sp|P47963|RL13_MOUSE 60S ribosomal protein L13 OS=Mus musculus OX=10090 GN=Rpl13 PE=1 SV=3	1	5	5	5	3	3	2	3	3	3	3	1	2	3	2	4	3	4	0	2	3	3	4	5	2	0	2	3	1	3	2	3	2	2	1	2	1	3	1	4	2
165	P48036	P48036	8	8	8	Annexin A5	Anxa5	sp|P48036|ANXA5_MOUSE Annexin A5 OS=Mus musculus OX=10090 GN=Anxa5 PE=1 SV=1	1	8	8	8	3	4	5	3	5	5	5	2	3	3	2	5	3	4	2	1	1	3	4	4	5	1	4	4	4	5	5	2	4	4	6	3	5	6	4	4	5
166	P48678	P48678	14	14	13	Prelamin-A/C;Lamin-A/C	Lmna	sp|P48678|LMNA_MOUSE Prelamin-A/C OS=Mus musculus OX=10090 GN=Lmna PE=1 SV=2	1	14	14	13	3	3	3	3	4	4	5	5	3	3	4	2	2	2	2	2	4	2	7	6	3	2	3	2	2	2	2	2	3	4	2	2	2	1	1	1	3
167	P48758;Q8K354	P48758	9;1	9;1	9;1	Carbonyl reductase [NADPH] 1	Cbr1	sp|P48758|CBR1_MOUSE Carbonyl reductase [NADPH] 1 OS=Mus musculus OX=10090 GN=Cbr1 PE=1 SV=3	2	9	9	9	4	2	1	4	3	2	4	3	2	1	3	2	2	2	4	3	4	2	1	2	2	2	3	3	0	4	3	2	1	4	2	1	3	0	1	3	3
168	P48962;Q3V132	P48962	7;3	1;0	1;0	ADP/ATP translocase 1	Slc25a4	sp|P48962|ADT1_MOUSE ADP/ATP translocase 1 OS=Mus musculus OX=10090 GN=Slc25a4 PE=1 SV=4	2	7	1	1	5	4	4	3	3	5	4	6	4	4	6	4	4	7	4	2	3	6	4	3	4	5	4	2	4	4	3	4	6	6	0	2	1	4	1	4	5
169	P50247	P50247	7	7	7	Adenosylhomocysteinase	Ahcy	sp|P50247|SAHH_MOUSE Adenosylhomocysteinase OS=Mus musculus OX=10090 GN=Ahcy PE=1 SV=3	1	7	7	7	3	4	1	3	2	2	3	3	3	4	2	1	1	3	3	3	3	2	3	2	1	2	2	2	2	1	2	4	2	2	1	1	2	2	2	2	2
170	P51150	P51150	2	2	2	Ras-related protein Rab-7a	Rab7a	sp|P51150|RAB7A_MOUSE Ras-related protein Rab-7a OS=Mus musculus OX=10090 GN=Rab7a PE=1 SV=2	1	2	2	2	0	1	1	0	0	0	0	0	0	1	0	0	0	0	0	0	0	0	0	0	0	0	0	0	0	0	0	1	0	1	1	0	0	0	1	0	1
171	P51174	P51174	4	4	4	Long-chain specific acyl-CoA dehydrogenase, mitochondrial	Acadl	sp|P51174|ACADL_MOUSE Long-chain specific acyl-CoA dehydrogenase, mitochondrial OS=Mus musculus OX=10090 GN=Acadl PE=1 SV=2	1	4	4	4	0	1	1	0	1	1	0	2	1	0	0	1	0	1	1	0	0	1	1	0	0	0	0	0	0	0	0	1	1	1	0	0	0	1	0	1	1
172	P51410	P51410	2	2	2	60S ribosomal protein L9	Rpl9	sp|P51410|RL9_MOUSE 60S ribosomal protein L9 OS=Mus musculus OX=10090 GN=Rpl9 PE=2 SV=2	1	2	2	2	1	0	0	0	1	0	0	1	0	0	1	0	0	1	1	0	0	0	1	0	0	1	0	0	1	0	0	1	1	1	0	0	0	1	0	2	1
173	P51661	P51661	2	2	2	Corticosteroid 11-beta-dehydrogenase isozyme 2	Hsd11b2	sp|P51661|DHI2_MOUSE Corticosteroid 11-beta-dehydrogenase isozyme 2 OS=Mus musculus OX=10090 GN=Hsd11b2 PE=1 SV=2	1	2	2	2	1	0	0	0	0	0	1	0	0	2	0	1	0	1	0	0	0	1	0	0	1	0	0	1	1	1	1	0	0	1	1	0	1	1	0	1	0
174	P51855	P51855	3	3	3	Glutathione synthetase	Gss	sp|P51855|GSHB_MOUSE Glutathione synthetase OS=Mus musculus OX=10090 GN=Gss PE=1 SV=1	1	3	3	3	0	0	0	0	0	0	0	0	0	0	0	0	0	0	1	1	1	0	0	0	0	0	0	0	0	0	0	0	0	1	0	2	1	0	0	0	0
175	P51881	P51881	11	11	5	ADP/ATP translocase 2;ADP/ATP translocase 2, N-terminally processed	Slc25a5	sp|P51881|ADT2_MOUSE ADP/ATP translocase 2 OS=Mus musculus OX=10090 GN=Slc25a5 PE=1 SV=3	1	11	11	5	9	7	7	6	6	7	6	9	9	8	9	8	7	9	9	6	8	9	8	6	7	8	7	5	7	6	6	6	9	9	3	5	4	9	4	5	8
176	P52196	P52196	4	4	4	Thiosulfate sulfurtransferase	Tst	sp|P52196|THTR_MOUSE Thiosulfate sulfurtransferase OS=Mus musculus OX=10090 GN=Tst PE=1 SV=3	1	4	4	4	4	2	2	2	0	1	0	1	0	1	1	0	1	2	2	2	1	0	2	1	0	0	1	2	2	0	1	1	0	0	0	1	2	0	0	1	0
177	P52480;P53657	P52480	17;1	17;1	17;1	Pyruvate kinase PKM	Pkm	sp|P52480|KPYM_MOUSE Pyruvate kinase PKM OS=Mus musculus OX=10090 GN=Pkm PE=1 SV=4	2	17	17	17	6	4	5	4	4	7	3	6	6	2	5	5	3	6	3	2	4	3	3	7	5	3	7	5	7	3	4	4	5	5	4	3	5	5	2	6	5
178	P52840	P52840	5	5	5	Sulfotransferase 1A1	Sult1a1	sp|P52840|ST1A1_MOUSE Sulfotransferase 1A1 OS=Mus musculus OX=10090 GN=Sult1a1 PE=1 SV=1	1	5	5	5	2	1	1	1	3	1	2	1	2	1	1	2	2	0	2	2	1	1	1	2	2	3	1	1	1	2	2	1	2	2	0	2	1	1	2	1	2
179	P53994;P59279	P53994;P59279	2;1	2;1	2;1	Ras-related protein Rab-2A;Ras-related protein Rab-2B	Rab2a;Rab2b	sp|P53994|RAB2A_MOUSE Ras-related protein Rab-2A OS=Mus musculus OX=10090 GN=Rab2a PE=1 SV=1;sp|P59279|RAB2B_MOUSE Ras-related protein Rab-2B OS=Mus musculus OX=10090 GN=Rab2b PE=1 SV=1	2	2	2	2	0	0	0	0	0	0	0	1	0	0	0	0	0	0	0	0	0	0	0	1	0	0	0	1	0	0	0	0	0	0	0	0	1	0	0	0	0
180	P54071	P54071	5	4	4	Isocitrate dehydrogenase [NADP], mitochondrial	Idh2	sp|P54071|IDHP_MOUSE Isocitrate dehydrogenase [NADP], mitochondrial OS=Mus musculus OX=10090 GN=Idh2 PE=1 SV=3	1	5	4	4	2	3	2	3	2	1	2	1	2	2	4	0	3	1	2	1	2	1	1	2	1	2	2	2	0	0	1	2	2	0	3	2	4	3	1	2	2
181	P54869;Q8JZK9	P54869	13;1	13;1	13;1	Hydroxymethylglutaryl-CoA synthase, mitochondrial	Hmgcs2	sp|P54869|HMCS2_MOUSE Hydroxymethylglutaryl-CoA synthase, mitochondrial OS=Mus musculus OX=10090 GN=Hmgcs2 PE=1 SV=2	2	13	13	13	8	7	3	4	5	4	6	6	5	8	6	8	10	5	6	6	3	6	8	5	4	2	6	10	7	4	10	8	6	7	8	9	7	5	5	6	6
182	P56135	P56135	2	2	2	ATP synthase subunit f, mitochondrial	Atp5j2	sp|P56135|ATPK_MOUSE ATP synthase subunit f, mitochondrial OS=Mus musculus OX=10090 GN=Atp5mf PE=1 SV=3	1	2	2	2	1	1	1	1	1	1	1	1	1	1	2	2	1	2	2	1	0	2	1	2	1	1	2	1	2	2	2	2	2	1	1	1	0	2	1	1	1
183	P56480	P56480	23	23	23	ATP synthase subunit beta, mitochondrial	Atp5b	sp|P56480|ATPB_MOUSE ATP synthase subunit beta, mitochondrial OS=Mus musculus OX=10090 GN=Atp5f1b PE=1 SV=2	1	23	23	23	15	16	13	13	12	16	15	14	14	16	13	15	16	16	14	17	13	16	16	12	15	16	15	17	16	13	13	11	15	16	13	13	15	15	15	15	14
184	P57776	P57776	4	4	4	Elongation factor 1-delta	Eef1d	sp|P57776|EF1D_MOUSE Elongation factor 1-delta OS=Mus musculus OX=10090 GN=Eef1d PE=1 SV=3	1	4	4	4	1	1	0	2	0	0	2	1	2	0	1	1	0	1	1	1	0	1	1	2	1	1	2	3	2	1	0	1	1	0	1	3	0	1	1	1	0
185	P57780;Q7TPR4;Q9JI91;O88990	P57780;Q7TPR4	14;7;4;3	14;7;4;3	14;7;4;3	Alpha-actinin-4;Alpha-actinin-1	Actn4;Actn1	sp|P57780|ACTN4_MOUSE Alpha-actinin-4 OS=Mus musculus OX=10090 GN=Actn4 PE=1 SV=1;sp|Q7TPR4|ACTN1_MOUSE Alpha-actinin-1 OS=Mus musculus OX=10090 GN=Actn1 PE=1 SV=1	4	14	14	14	3	4	6	5	3	3	6	3	3	6	6	2	5	2	1	5	6	3	2	6	6	3	5	1	6	6	5	5	8	4	5	4	3	4	6	4	5
186	P58252;O08810	P58252	13;1	13;1	13;1	Elongation factor 2	Eef2	sp|P58252|EF2_MOUSE Elongation factor 2 OS=Mus musculus OX=10090 GN=Eef2 PE=1 SV=2	2	13	13	13	2	3	5	2	4	1	2	3	2	4	3	5	4	6	5	7	6	4	6	2	4	3	3	4	5	6	6	5	4	4	4	7	5	1	3	4	6
187	P58771	P58771	4	1	1	Tropomyosin alpha-1 chain	Tpm1	sp|P58771|TPM1_MOUSE Tropomyosin alpha-1 chain OS=Mus musculus OX=10090 GN=Tpm1 PE=1 SV=1	1	4	1	1	1	1	3	0	3	2	2	2	2	1	0	2	2	2	1	2	0	2	1	2	1	2	3	1	2	3	3	1	2	1	3	3	3	3	1	1	2
188	Q8BT60;P59108;Q1RLL3;Q9Z140;Q8BLR2;Q0VE82;Q9DC53;Q8JZW4	Q8BT60;P59108;Q1RLL3;Q9Z140;Q8BLR2;Q0VE82;Q9DC53;Q8JZW4	1;1;1;1;1;1;1;1	1;1;1;1;1;1;1;1	1;1;1;1;1;1;1;1	Copine-3;Copine-2;Copine-9;Copine-6;Copine-4;Copine-7;Copine-8;Copine-5	Cpne3;Cpne2;Cpne9;Cpne6;Cpne4;Cpne7;Cpne8;Cpne5	sp|Q8BT60|CPNE3_MOUSE Copine-3 OS=Mus musculus OX=10090 GN=Cpne3 PE=1 SV=2;sp|P59108|CPNE2_MOUSE Copine-2 OS=Mus musculus OX=10090 GN=Cpne2 PE=1 SV=1;sp|Q1RLL3|CPNE9_MOUSE Copine-9 OS=Mus musculus OX=10090 GN=Cpne9 PE=1 SV=1;sp|Q9Z140|CPNE6_MOUSE Copine-6	8	1	1	1	0	0	0	0	0	1	0	0	0	0	0	1	1	0	0	0	0	0	0	0	0	0	0	0	0	0	1	0	0	0	1	0	0	0	0	0	0
189	P59999	P59999	3	3	3	Actin-related protein 2/3 complex subunit 4	Arpc4	sp|P59999|ARPC4_MOUSE Actin-related protein 2/3 complex subunit 4 OS=Mus musculus OX=10090 GN=Arpc4 PE=1 SV=3	1	3	3	3	1	1	0	0	1	0	0	1	0	1	1	1	1	0	1	0	1	0	1	1	1	1	1	0	1	1	0	2	1	1	0	1	0	1	1	1	1
190	P60060	P60060	1	1	1	Protein transport protein Sec61 subunit gamma	Sec61g	sp|P60060|SC61G_MOUSE Protein transport protein Sec61 subunit gamma OS=Mus musculus OX=10090 GN=Sec61g PE=3 SV=1	1	1	1	1	0	0	0	0	0	0	0	0	0	0	0	0	0	1	0	0	0	1	1	0	0	1	0	0	0	0	0	0	0	0	0	0	0	0	0	0	0
191	P60335	P60335	1	1	1	Poly(rC)-binding protein 1	Pcbp1	sp|P60335|PCBP1_MOUSE Poly(rC)-binding protein 1 OS=Mus musculus OX=10090 GN=Pcbp1 PE=1 SV=1	1	1	1	1	1	1	1	1	1	1	1	1	1	1	1	1	0	0	1	0	1	1	0	1	1	0	0	0	0	1	0	1	1	0	1	1	1	0	1	0	1
192	P60710	P60710	17	17	1	Actin, cytoplasmic 1;Actin, cytoplasmic 1, N-terminally processed	Actb	sp|P60710|ACTB_MOUSE Actin, cytoplasmic 1 OS=Mus musculus OX=10090 GN=Actb PE=1 SV=1	1	17	17	1	13	14	14	14	14	14	14	14	14	14	13	15	14	14	14	14	14	14	14	14	14	14	14	12	15	14	14	15	15	15	15	14	14	14	13	13	14
193	P60766	P60766	1	1	1	Cell division control protein 42 homolog	Cdc42	sp|P60766|CDC42_MOUSE Cell division control protein 42 homolog OS=Mus musculus OX=10090 GN=Cdc42 PE=1 SV=2	1	1	1	1	0	0	1	0	0	1	1	0	0	0	0	0	1	0	1	0	0	0	1	1	0	1	0	0	0	1	0	1	0	1	1	0	0	1	0	1	1
194	P60843;P10630;Q91VC3	P60843;P10630	6;5;1	6;5;1	6;5;1	Eukaryotic initiation factor 4A-I;Eukaryotic initiation factor 4A-II;Eukaryotic initiation factor 4A-II, N-terminally processed	Eif4a1;Eif4a2	sp|P60843|IF4A1_MOUSE Eukaryotic initiation factor 4A-I OS=Mus musculus OX=10090 GN=Eif4a1 PE=1 SV=1;sp|P10630|IF4A2_MOUSE Eukaryotic initiation factor 4A-II OS=Mus musculus OX=10090 GN=Eif4a2 PE=1 SV=2	3	6	6	6	4	2	2	2	3	1	3	1	1	1	1	4	2	2	3	1	4	3	2	2	2	2	1	3	2	3	3	4	2	4	0	2	1	1	4	3	3
195	P60867	P60867	2	2	2	40S ribosomal protein S20	Rps20	sp|P60867|RS20_MOUSE 40S ribosomal protein S20 OS=Mus musculus OX=10090 GN=Rps20 PE=1 SV=1	1	2	2	2	0	0	1	0	1	2	1	0	1	0	1	1	1	1	0	2	1	2	0	0	0	1	1	1	1	0	2	0	1	1	2	1	1	1	1	1	1
196	P61089	P61089	2	2	2	Ubiquitin-conjugating enzyme E2 N	Ube2n	sp|P61089|UBE2N_MOUSE Ubiquitin-conjugating enzyme E2 N OS=Mus musculus OX=10090 GN=Ube2n PE=1 SV=1	1	2	2	2	1	0	1	1	0	0	1	0	1	0	0	1	1	0	0	1	1	0	0	1	0	0	0	0	0	0	0	0	0	0	0	0	0	0	0	0	0
197	P61161	P61161	5	5	5	Actin-related protein 2	Actr2	sp|P61161|ARP2_MOUSE Actin-related protein 2 OS=Mus musculus OX=10090 GN=Actr2 PE=1 SV=1	1	5	5	5	0	1	0	1	1	1	1	0	1	0	1	1	0	1	0	1	1	1	1	0	0	1	2	1	1	1	2	0	2	1	0	0	1	2	0	1	1
198	P84078;P61205;Q8BSL7;P84084	P84078;P61205;Q8BSL7	6;6;4;2	6;6;4;2	5;5;3;1	ADP-ribosylation factor 1;ADP-ribosylation factor 3;ADP-ribosylation factor 2	Arf1;Arf3;Arf2	sp|P84078|ARF1_MOUSE ADP-ribosylation factor 1 OS=Mus musculus OX=10090 GN=Arf1 PE=1 SV=2;sp|P61205|ARF3_MOUSE ADP-ribosylation factor 3 OS=Mus musculus OX=10090 GN=Arf3 PE=2 SV=2;sp|Q8BSL7|ARF2_MOUSE ADP-ribosylation factor 2 OS=Mus musculus OX=10090 GN=A	4	6	6	5	3	4	4	1	3	4	4	5	2	3	1	4	4	2	3	4	3	2	4	3	3	3	4	3	4	2	2	3	4	3	2	3	3	3	3	3	3
199	P61358	P61358	2	2	2	60S ribosomal protein L27	Rpl27	sp|P61358|RL27_MOUSE 60S ribosomal protein L27 OS=Mus musculus OX=10090 GN=Rpl27 PE=1 SV=2	1	2	2	2	1	1	1	0	1	0	0	1	0	1	1	1	1	0	0	0	0	1	0	1	0	1	1	1	1	1	1	0	1	1	1	1	0	0	0	1	0
200	P61750	P61750	5	4	4	ADP-ribosylation factor 4	Arf4	sp|P61750|ARF4_MOUSE ADP-ribosylation factor 4 OS=Mus musculus OX=10090 GN=Arf4 PE=1 SV=2	1	5	4	4	1	1	1	1	2	3	1	2	1	1	1	1	1	3	2	1	3	1	3	3	1	1	1	1	2	0	1	2	1	2	0	3	1	2	1	2	2
201	P61922	P61922	3	3	3	4-aminobutyrate aminotransferase, mitochondrial	Abat	sp|P61922|GABT_MOUSE 4-aminobutyrate aminotransferase, mitochondrial OS=Mus musculus OX=10090 GN=Abat PE=1 SV=1	1	3	3	3	0	0	0	0	1	2	1	0	0	0	0	0	1	0	0	0	0	0	0	0	0	1	0	0	0	1	0	0	0	0	0	0	0	0	0	0	0
202	P61924	P61924	2	2	2	Coatomer subunit zeta-1	Copz1	sp|P61924|COPZ1_MOUSE Coatomer subunit zeta-1 OS=Mus musculus OX=10090 GN=Copz1 PE=1 SV=1	1	2	2	2	0	0	0	0	0	0	1	1	0	0	1	0	0	0	0	1	0	0	0	0	0	0	0	0	0	0	0	0	1	0	0	0	0	1	0	0	0
203	P61979	P61979	5	5	5	Heterogeneous nuclear ribonucleoprotein K	Hnrnpk	sp|P61979|HNRPK_MOUSE Heterogeneous nuclear ribonucleoprotein K OS=Mus musculus OX=10090 GN=Hnrnpk PE=1 SV=1	1	5	5	5	3	1	2	1	2	1	2	1	2	3	2	0	1	0	2	2	2	2	3	2	2	1	1	1	2	3	2	2	3	3	2	1	4	2	3	3	2
204	P61982	P61982	3	1	1	14-3-3 protein gamma;14-3-3 protein gamma, N-terminally processed	Ywhag	sp|P61982|1433G_MOUSE 14-3-3 protein gamma OS=Mus musculus OX=10090 GN=Ywhag PE=1 SV=2	1	3	1	1	1	1	2	1	2	2	3	3	2	1	3	2	2	2	2	2	2	2	2	1	2	2	3	2	2	3	3	3	3	3	2	2	2	3	3	3	2
205	P62082	P62082	2	2	2	40S ribosomal protein S7	Rps7	sp|P62082|RS7_MOUSE 40S ribosomal protein S7 OS=Mus musculus OX=10090 GN=Rps7 PE=2 SV=1	1	2	2	2	1	2	1	0	1	1	0	1	2	2	1	1	1	1	1	0	0	0	0	0	1	0	1	0	1	2	1	1	1	1	0	0	1	1	1	0	2
206	P62242	P62242	4	4	4	40S ribosomal protein S8	Rps8	sp|P62242|RS8_MOUSE 40S ribosomal protein S8 OS=Mus musculus OX=10090 GN=Rps8 PE=1 SV=2	1	4	4	4	1	3	1	0	1	2	1	1	0	2	3	1	1	2	0	1	1	3	1	3	0	1	1	2	2	0	1	2	2	1	0	1	0	2	3	2	3
207	P62245	P62245	3	3	3	40S ribosomal protein S15a	Rps15a	sp|P62245|RS15A_MOUSE 40S ribosomal protein S15a OS=Mus musculus OX=10090 GN=Rps15a PE=1 SV=2	1	3	3	3	1	0	1	1	0	0	1	0	1	0	0	2	0	0	0	0	0	0	1	1	0	0	0	1	0	0	0	0	1	0	1	0	0	1	0	1	1
208	P62259	P62259	9	7	7	14-3-3 protein epsilon	Ywhae	sp|P62259|1433E_MOUSE 14-3-3 protein epsilon OS=Mus musculus OX=10090 GN=Ywhae PE=1 SV=1	1	9	7	7	4	5	7	3	5	4	4	4	2	3	4	3	4	5	2	6	4	5	4	3	4	3	4	5	5	5	4	2	3	3	3	4	5	3	4	3	4
209	P62264	P62264	2	2	2	40S ribosomal protein S14	Rps14	sp|P62264|RS14_MOUSE 40S ribosomal protein S14 OS=Mus musculus OX=10090 GN=Rps14 PE=1 SV=3	1	2	2	2	1	2	1	1	1	0	2	0	0	2	1	1	1	0	1	1	1	2	0	1	1	0	0	0	1	1	2	1	0	1	1	1	2	1	1	1	1
210	P62267	P62267	1	1	1	40S ribosomal protein S23	Rps23	sp|P62267|RS23_MOUSE 40S ribosomal protein S23 OS=Mus musculus OX=10090 GN=Rps23 PE=1 SV=3	1	1	1	1	1	0	0	0	1	0	0	0	0	1	0	1	0	1	0	1	1	0	0	0	0	0	1	0	0	1	0	0	0	0	0	0	0	0	0	0	1
211	P62270	P62270	6	6	6	40S ribosomal protein S18	Rps18	sp|P62270|RS18_MOUSE 40S ribosomal protein S18 OS=Mus musculus OX=10090 GN=Rps18 PE=1 SV=3	1	6	6	6	5	2	3	2	4	2	3	1	2	2	3	2	2	3	4	3	4	3	3	4	3	4	3	2	3	0	2	4	3	4	5	2	4	4	2	3	4
212	P62301	P62301	4	4	4	40S ribosomal protein S13	Rps13	sp|P62301|RS13_MOUSE 40S ribosomal protein S13 OS=Mus musculus OX=10090 GN=Rps13 PE=1 SV=2	1	4	4	4	1	2	1	2	2	2	3	1	2	1	4	3	1	1	2	2	2	1	1	2	1	2	1	2	2	2	1	1	1	2	1	3	2	1	2	3	2
213	P62320	P62320	2	2	2	Small nuclear ribonucleoprotein Sm D3	Snrpd3	sp|P62320|SMD3_MOUSE Small nuclear ribonucleoprotein Sm D3 OS=Mus musculus OX=10090 GN=Snrpd3 PE=1 SV=1	1	2	2	2	1	0	1	0	0	1	0	0	0	0	0	0	0	0	0	0	0	1	1	1	1	1	0	0	0	0	0	0	0	1	1	0	0	0	0	0	0
214	P62702	P62702	3	3	3	40S ribosomal protein S4, X isoform	Rps4x	sp|P62702|RS4X_MOUSE 40S ribosomal protein S4, X isoform OS=Mus musculus OX=10090 GN=Rps4x PE=1 SV=2	1	3	3	3	0	0	0	0	1	1	0	1	1	0	0	2	0	1	0	1	1	1	1	0	0	0	0	0	1	0	0	0	0	0	1	0	0	1	1	1	0
215	P62717	P62717	2	2	2	60S ribosomal protein L18a	Rpl18a	sp|P62717|RL18A_MOUSE 60S ribosomal protein L18a OS=Mus musculus OX=10090 GN=Rpl18a PE=1 SV=1	1	2	2	2	0	0	0	1	1	0	0	0	1	0	1	0	1	0	1	0	0	0	1	1	0	1	0	0	0	1	1	0	0	0	0	0	0	0	0	1	0
216	P62737;P63268	P62737;P63268	16;15	1;1	1;1	Actin, aortic smooth muscle;Actin, gamma-enteric smooth muscle	Acta2;Actg2	sp|P62737|ACTA_MOUSE Actin, aortic smooth muscle OS=Mus musculus OX=10090 GN=Acta2 PE=1 SV=1;sp|P63268|ACTH_MOUSE Actin, gamma-enteric smooth muscle OS=Mus musculus OX=10090 GN=Actg2 PE=1 SV=1	2	16	1	1	10	12	12	14	12	12	11	12	12	11	11	11	13	12	10	12	12	14	13	12	13	14	15	11	13	14	16	12	12	12	12	13	12	14	11	12	13
217	P62751	P62751	2	2	2	60S ribosomal protein L23a	Rpl23a	sp|P62751|RL23A_MOUSE 60S ribosomal protein L23a OS=Mus musculus OX=10090 GN=Rpl23a PE=1 SV=1	1	2	2	2	2	2	1	1	1	1	1	0	1	0	2	1	1	1	2	1	1	1	0	1	1	1	1	1	1	1	2	1	1	1	1	1	1	2	1	1	1
218	P62754	P62754	3	3	3	40S ribosomal protein S6	Rps6	sp|P62754|RS6_MOUSE 40S ribosomal protein S6 OS=Mus musculus OX=10090 GN=Rps6 PE=1 SV=1	1	3	3	3	2	2	2	1	1	0	1	2	0	1	2	2	1	1	0	1	1	2	1	3	1	1	1	2	2	3	2	0	2	1	0	0	0	1	1	1	1
219	P62806	P62806	10	10	10	Histone H4	Hist1h4a	sp|P62806|H4_MOUSE Histone H4 OS=Mus musculus OX=10090 GN=H4c1 PE=1 SV=2	1	10	10	10	8	9	6	7	8	9	9	8	8	7	6	8	8	7	8	7	7	7	8	8	6	7	7	10	10	8	6	9	8	7	8	8	7	7	10	7	7
220	P62821;Q9DD03;P61028;P55258;Q8K386	P62821	3;1;1;1;1	3;1;1;1;1	1;0;0;0;0	Ras-related protein Rab-1A	Rab1A	sp|P62821|RAB1A_MOUSE Ras-related protein Rab-1A OS=Mus musculus OX=10090 GN=Rab1A PE=1 SV=3	5	3	3	1	0	1	2	1	0	1	2	2	2	1	1	1	0	0	1	1	1	2	1	2	0	1	0	0	1	2	1	1	1	0	1	2	1	1	2	1	2
221	P62827;Q61820	P62827;Q61820	4;2	4;2	4;2	GTP-binding nuclear protein Ran;GTP-binding nuclear protein Ran, testis-specific isoform	Ran;Rasl2-9	sp|P62827|RAN_MOUSE GTP-binding nuclear protein Ran OS=Mus musculus OX=10090 GN=Ran PE=1 SV=3;sp|Q61820|RANT_MOUSE GTP-binding nuclear protein Ran, testis-specific isoform OS=Mus musculus OX=10090 GN=Rasl2-9 PE=2 SV=1	2	4	4	4	0	0	1	2	2	2	1	2	2	0	0	1	1	2	0	2	0	1	0	1	1	0	1	0	0	0	0	1	1	2	1	1	0	0	0	1	1
222	Q99JI6;P62835	Q99JI6;P62835	3;3	3;3	3;3	Ras-related protein Rap-1b;Ras-related protein Rap-1A	Rap1b;Rap1a	sp|Q99JI6|RAP1B_MOUSE Ras-related protein Rap-1b OS=Mus musculus OX=10090 GN=Rap1b PE=1 SV=2;sp|P62835|RAP1A_MOUSE Ras-related protein Rap-1A OS=Mus musculus OX=10090 GN=Rap1a PE=1 SV=1	2	3	3	3	0	0	0	0	0	0	0	0	0	0	0	0	0	0	0	0	0	1	0	0	1	0	0	0	0	0	0	0	0	1	0	0	2	0	0	1	1
223	P62849	P62849	2	2	2	40S ribosomal protein S24	Rps24	sp|P62849|RS24_MOUSE 40S ribosomal protein S24 OS=Mus musculus OX=10090 GN=Rps24 PE=1 SV=1	1	2	2	2	0	2	1	1	0	0	1	0	1	1	0	1	1	1	0	0	2	1	1	0	1	0	0	0	1	2	1	1	1	1	1	1	0	0	0	0	1
224	P62852	P62852	3	3	3	40S ribosomal protein S25	Rps25	sp|P62852|RS25_MOUSE 40S ribosomal protein S25 OS=Mus musculus OX=10090 GN=Rps25 PE=1 SV=1	1	3	3	3	2	2	2	1	2	2	2	0	2	1	2	1	1	1	2	2	2	2	2	1	1	1	1	2	0	1	1	1	1	0	2	3	2	3	1	1	2
225	P62855	P62855	2	2	2	40S ribosomal protein S26	Rps26	sp|P62855|RS26_MOUSE 40S ribosomal protein S26 OS=Mus musculus OX=10090 GN=Rps26 PE=1 SV=3	1	2	2	2	0	0	0	0	1	0	0	0	1	0	0	1	0	0	0	0	0	1	0	0	0	0	1	1	0	0	0	0	1	1	0	1	1	1	0	0	1
226	P62858	P62858	1	1	1	40S ribosomal protein S28	Rps28	sp|P62858|RS28_MOUSE 40S ribosomal protein S28 OS=Mus musculus OX=10090 GN=Rps28 PE=1 SV=1	1	1	1	1	1	1	1	0	0	1	0	1	1	1	1	1	1	1	1	0	1	1	1	1	1	0	1	1	1	1	0	0	1	1	1	0	1	1	1	0	0
227	P62862	P62862	1	1	1	40S ribosomal protein S30	Fau	sp|P62862|RS30_MOUSE 40S ribosomal protein S30 OS=Mus musculus OX=10090 GN=Fau PE=1 SV=1	1	1	1	1	1	1	1	0	1	0	1	0	0	0	0	0	1	0	0	1	0	1	0	1	1	0	1	1	0	0	0	0	1	0	1	1	0	0	1	0	1
228	P62897;CON__P62894;P00015	P62897	5;2;1	5;2;1	5;2;1	Cytochrome c, somatic	Cycs	sp|P62897|CYC_MOUSE Cytochrome c, somatic OS=Mus musculus OX=10090 GN=Cycs PE=1 SV=2	3	5	5	5	3	3	3	2	4	3	4	3	2	3	3	2	2	3	3	3	4	3	3	2	3	2	5	4	4	3	3	3	4	2	3	3	5	3	4	4	3
229	P62900	P62900	2	2	2	60S ribosomal protein L31	Rpl31	sp|P62900|RL31_MOUSE 60S ribosomal protein L31 OS=Mus musculus OX=10090 GN=Rpl31 PE=1 SV=1	1	2	2	2	0	1	0	0	1	1	2	1	1	0	1	0	1	1	0	1	2	0	1	1	1	1	2	0	0	2	0	1	1	0	1	0	1	1	0	2	1
230	P62908	P62908	6	6	6	40S ribosomal protein S3	Rps3	sp|P62908|RS3_MOUSE 40S ribosomal protein S3 OS=Mus musculus OX=10090 GN=Rps3 PE=1 SV=1	1	6	6	6	2	1	3	2	2	3	0	4	0	2	2	3	3	2	1	3	3	3	0	2	1	2	2	1	3	1	2	2	2	3	0	1	2	5	1	2	4
231	P62918	P62918	2	2	2	60S ribosomal protein L8	Rpl8	sp|P62918|RL8_MOUSE 60S ribosomal protein L8 OS=Mus musculus OX=10090 GN=Rpl8 PE=1 SV=2	1	2	2	2	1	1	1	1	0	1	1	1	1	1	1	1	1	1	1	1	0	1	1	1	1	1	1	1	1	1	1	1	1	1	1	1	1	1	1	1	1
232	P63017;P17156	P63017	21;8	19;6	18;5	Heat shock cognate 71 kDa protein	Hspa8	sp|P63017|HSP7C_MOUSE Heat shock cognate 71 kDa protein OS=Mus musculus OX=10090 GN=Hspa8 PE=1 SV=1	2	21	19	18	11	11	12	11	11	12	12	16	13	8	14	16	11	14	11	13	16	13	13	15	13	15	14	11	13	15	13	17	12	8	13	15	15	13	9	10	9
233	P63028	P63028	1	1	1	Translationally-controlled tumor protein	Tpt1	sp|P63028|TCTP_MOUSE Translationally-controlled tumor protein OS=Mus musculus OX=10090 GN=Tpt1 PE=1 SV=1	1	1	1	1	1	1	1	1	0	1	0	0	0	0	0	1	1	1	1	0	1	0	0	0	1	1	1	1	1	1	1	0	1	0	1	1	1	1	1	1	0
234	P63038	P63038	14	14	14	60 kDa heat shock protein, mitochondrial	Hspd1	sp|P63038|CH60_MOUSE 60 kDa heat shock protein, mitochondrial OS=Mus musculus OX=10090 GN=Hspd1 PE=1 SV=1	1	14	14	14	5	7	6	8	8	6	7	8	8	6	6	7	5	8	5	6	5	7	10	6	4	7	6	8	5	6	6	8	7	7	7	7	8	8	6	4	7
235	P63101	P63101	9	9	7	14-3-3 protein zeta/delta	Ywhaz	sp|P63101|1433Z_MOUSE 14-3-3 protein zeta/delta OS=Mus musculus OX=10090 GN=Ywhaz PE=1 SV=1	1	9	9	7	5	5	5	5	8	7	5	6	6	5	6	5	6	6	6	7	7	5	6	7	7	7	7	5	7	7	7	6	8	6	3	7	8	6	7	6	7
236	P63158	P63158	2	2	2	High mobility group protein B1	Hmgb1	sp|P63158|HMGB1_MOUSE High mobility group protein B1 OS=Mus musculus OX=10090 GN=Hmgb1 PE=1 SV=2	1	2	2	2	0	1	0	0	0	0	0	0	1	1	0	0	0	0	0	1	0	1	0	1	1	0	0	0	0	0	0	0	0	0	0	0	0	0	1	0	1
237	Q8BGY2;P63242	Q8BGY2;P63242	1;1	1;1	1;1	Eukaryotic translation initiation factor 5A-2;Eukaryotic translation initiation factor 5A-1	Eif5a2;Eif5a	sp|Q8BGY2|IF5A2_MOUSE Eukaryotic translation initiation factor 5A-2 OS=Mus musculus OX=10090 GN=Eif5a2 PE=1 SV=3;sp|P63242|IF5A1_MOUSE Eukaryotic translation initiation factor 5A-1 OS=Mus musculus OX=10090 GN=Eif5a PE=1 SV=2	2	1	1	1	1	1	1	0	1	1	1	1	1	1	1	0	0	1	1	1	1	1	1	1	0	1	1	1	1	1	1	1	1	1	1	0	1	0	0	1	1
238	P63260	P63260	17	1	1	Actin, cytoplasmic 2;Actin, cytoplasmic 2, N-terminally processed	Actg1	sp|P63260|ACTG_MOUSE Actin, cytoplasmic 2 OS=Mus musculus OX=10090 GN=Actg1 PE=1 SV=1	1	17	1	1	13	14	14	14	14	14	14	14	14	14	13	15	14	14	14	14	14	14	14	14	14	15	14	12	15	14	14	15	15	15	15	14	14	14	13	13	14
239	P63276	P63276	3	3	3	40S ribosomal protein S17	Rps17	sp|P63276|RS17_MOUSE 40S ribosomal protein S17 OS=Mus musculus OX=10090 GN=Rps17 PE=1 SV=2	1	3	3	3	0	0	1	0	1	0	0	0	0	0	0	0	1	0	0	0	0	0	2	0	0	0	0	0	0	0	1	1	0	0	0	0	0	0	0	1	0
240	P63323	P63323	2	2	2	40S ribosomal protein S12	Rps12	sp|P63323|RS12_MOUSE 40S ribosomal protein S12 OS=Mus musculus OX=10090 GN=Rps12 PE=1 SV=2	1	2	2	2	2	2	0	1	2	1	1	1	2	0	2	2	1	2	1	1	1	2	2	1	1	0	1	0	2	1	1	0	1	1	1	2	1	1	1	1	1
241	P63325	P63325	3	3	3	40S ribosomal protein S10	Rps10	sp|P63325|RS10_MOUSE 40S ribosomal protein S10 OS=Mus musculus OX=10090 GN=Rps10 PE=1 SV=1	1	3	3	3	1	1	2	1	1	2	2	1	1	0	1	1	2	2	1	2	0	1	2	1	1	1	2	2	1	1	2	1	1	1	1	1	1	1	3	1	1
242	P67778	P67778	5	5	5	Prohibitin	Phb	sp|P67778|PHB_MOUSE Prohibitin OS=Mus musculus OX=10090 GN=Phb PE=1 SV=1	1	5	5	5	1	1	1	2	2	3	2	2	0	3	0	1	1	2	1	1	2	3	2	2	0	3	1	2	1	1	1	2	1	3	2	1	4	1	2	0	3
243	P67984	P67984	2	2	2	60S ribosomal protein L22	Rpl22	sp|P67984|RL22_MOUSE 60S ribosomal protein L22 OS=Mus musculus OX=10090 GN=Rpl22 PE=1 SV=2	1	2	2	2	1	1	2	1	1	1	1	0	2	1	1	2	2	2	2	2	2	1	1	2	1	0	2	2	1	1	2	2	1	1	1	0	1	2	2	1	1
244	P68033;P68134	P68033;P68134	16;15	6;5	0;0	Actin, alpha cardiac muscle 1;Actin, alpha skeletal muscle	Actc1;Acta1	sp|P68033|ACTC_MOUSE Actin, alpha cardiac muscle 1 OS=Mus musculus OX=10090 GN=Actc1 PE=1 SV=1;sp|P68134|ACTS_MOUSE Actin, alpha skeletal muscle OS=Mus musculus OX=10090 GN=Acta1 PE=1 SV=1	2	16	6	0	11	13	13	14	13	13	12	13	12	12	12	12	14	13	11	13	12	15	13	13	14	14	15	12	14	14	16	13	13	13	13	13	13	14	12	13	14
245	P68037	P68037	2	2	2	Ubiquitin-conjugating enzyme E2 L3	Ube2l3	sp|P68037|UB2L3_MOUSE Ubiquitin-conjugating enzyme E2 L3 OS=Mus musculus OX=10090 GN=Ube2l3 PE=1 SV=1	1	2	2	2	0	0	0	0	0	1	0	0	0	0	0	0	0	0	0	0	1	0	0	0	0	0	0	0	0	0	0	0	0	0	0	1	0	1	0	0	0
246	P68040	P68040	6	6	6	Guanine nucleotide-binding protein subunit beta-2-like 1;Guanine nucleotide-binding protein subunit beta-2-like 1, N-terminally processed	Gnb2l1	sp|P68040|RACK1_MOUSE Receptor of activated protein C kinase 1 OS=Mus musculus OX=10090 GN=Rack1 PE=1 SV=3	1	6	6	6	2	2	3	0	1	2	1	2	1	0	3	3	1	2	3	2	1	2	2	4	4	3	4	0	1	1	1	4	2	1	1	2	1	3	1	3	2
247	P68254	P68254	4	2	2	14-3-3 protein theta	Ywhaq	sp|P68254|1433T_MOUSE 14-3-3 protein theta OS=Mus musculus OX=10090 GN=Ywhaq PE=1 SV=1	1	4	2	2	3	2	3	3	4	1	4	3	2	1	2	3	4	3	4	4	2	3	3	3	3	3	2	3	2	2	3	2	2	2	2	4	3	3	3	2	3
248	P68368	P68368	10	2	2	Tubulin alpha-4A chain	Tuba4a	sp|P68368|TBA4A_MOUSE Tubulin alpha-4A chain OS=Mus musculus OX=10090 GN=Tuba4a PE=1 SV=1	1	10	2	2	4	2	3	3	2	6	3	4	3	2	4	2	5	3	5	5	4	4	4	5	3	4	2	2	6	4	5	6	2	4	4	4	2	5	4	2	3
249	P68372;Q922F4;CON__ENSEMBL:ENSBTAP00000025008;A2AQ07	P68372	14;5;2;2	14;5;2;2	1;0;0;0	Tubulin beta-4B chain	Tubb4b	sp|P68372|TBB4B_MOUSE Tubulin beta-4B chain OS=Mus musculus OX=10090 GN=Tubb4b PE=1 SV=1	4	14	14	1	12	8	10	9	10	7	11	10	7	10	11	11	10	11	10	12	11	9	11	11	11	11	11	10	12	10	9	10	9	9	11	11	10	12	10	11	11
250	P68510	P68510	5	3	3	14-3-3 protein eta	Ywhah	sp|P68510|1433F_MOUSE 14-3-3 protein eta OS=Mus musculus OX=10090 GN=Ywhah PE=1 SV=2	1	5	3	3	3	3	3	2	4	2	3	3	2	1	3	2	3	4	2	3	3	3	2	1	2	4	3	4	2	3	4	5	3	2	3	3	2	3	4	3	2
251	P70168	P70168	2	2	2	Importin subunit beta-1	Kpnb1	sp|P70168|IMB1_MOUSE Importin subunit beta-1 OS=Mus musculus OX=10090 GN=Kpnb1 PE=1 SV=2	1	2	2	2	0	0	0	0	0	0	0	0	0	0	1	0	0	0	0	0	0	0	0	0	0	0	0	0	0	0	0	1	0	1	1	0	0	0	0	0	0
252	P70296	P70296	4	4	4	Phosphatidylethanolamine-binding protein 1;Hippocampal cholinergic neurostimulating peptide	Pebp1	sp|P70296|PEBP1_MOUSE Phosphatidylethanolamine-binding protein 1 OS=Mus musculus OX=10090 GN=Pebp1 PE=1 SV=3	1	4	4	4	1	1	1	2	2	2	1	2	0	2	1	1	1	1	0	1	0	1	0	2	0	0	2	2	1	1	2	1	1	2	1	1	2	0	0	1	2
253	P70349	P70349	1	1	1	Histidine triad nucleotide-binding protein 1	Hint1	sp|P70349|HINT1_MOUSE Histidine triad nucleotide-binding protein 1 OS=Mus musculus OX=10090 GN=Hint1 PE=1 SV=3	1	1	1	1	1	1	0	0	1	1	0	0	1	0	1	1	1	1	1	1	1	1	1	1	1	1	1	1	1	1	1	1	1	1	1	1	1	1	1	1	1
254	P70372	P70372	2	2	2	ELAV-like protein 1	Elavl1	sp|P70372|ELAV1_MOUSE ELAV-like protein 1 OS=Mus musculus OX=10090 GN=Elavl1 PE=1 SV=2	1	2	2	2	0	0	0	0	0	0	0	0	0	0	0	1	0	0	0	0	0	0	0	0	0	0	0	1	0	0	0	0	1	0	0	0	1	0	0	0	0
255	P70441	P70441	2	2	2	Na(+)/H(+) exchange regulatory cofactor NHE-RF1	Slc9a3r1	sp|P70441|NHRF1_MOUSE Na(+)/H(+) exchange regulatory cofactor NHE-RF1 OS=Mus musculus OX=10090 GN=Slc9a3r1 PE=1 SV=3	1	2	2	2	0	1	1	1	2	0	0	1	1	0	0	0	1	1	0	0	0	0	0	1	1	0	0	0	0	1	1	2	1	1	0	0	2	0	1	0	0
256	P70695	P70695	3	3	3	Fructose-1,6-bisphosphatase isozyme 2	Fbp2	sp|P70695|F16P2_MOUSE Fructose-1,6-bisphosphatase isozyme 2 OS=Mus musculus OX=10090 GN=Fbp2 PE=1 SV=2	1	3	3	3	1	0	0	1	0	1	1	0	0	0	1	2	0	2	0	0	1	0	1	1	1	0	1	0	0	0	0	1	0	0	0	1	0	0	0	1	1
257	P80314	P80314	2	2	2	T-complex protein 1 subunit beta	Cct2	sp|P80314|TCPB_MOUSE T-complex protein 1 subunit beta OS=Mus musculus OX=10090 GN=Cct2 PE=1 SV=4	1	2	2	2	0	0	1	0	1	0	1	0	0	1	0	0	1	1	0	0	0	0	2	0	1	0	0	0	1	1	1	0	0	1	0	2	0	0	0	1	1
258	P80315	P80315	1	1	1	T-complex protein 1 subunit delta	Cct4	sp|P80315|TCPD_MOUSE T-complex protein 1 subunit delta OS=Mus musculus OX=10090 GN=Cct4 PE=1 SV=3	1	1	1	1	0	0	0	1	0	0	0	1	0	0	0	0	1	0	1	0	0	1	0	0	0	0	0	1	1	1	0	0	0	0	0	0	1	0	0	0	0
259	P80317	P80317	4	4	4	T-complex protein 1 subunit zeta	Cct6a	sp|P80317|TCPZ_MOUSE T-complex protein 1 subunit zeta OS=Mus musculus OX=10090 GN=Cct6a PE=1 SV=3	1	4	4	4	0	0	0	1	1	0	0	0	1	0	1	2	0	0	1	0	0	1	0	1	1	0	0	1	2	1	1	1	0	0	1	2	0	0	0	0	1
260	P80318	P80318	5	5	5	T-complex protein 1 subunit gamma	Cct3	sp|P80318|TCPG_MOUSE T-complex protein 1 subunit gamma OS=Mus musculus OX=10090 GN=Cct3 PE=1 SV=1	1	5	5	5	1	0	0	1	2	1	0	1	1	1	1	0	1	0	0	2	0	0	0	1	0	2	0	1	2	1	3	0	1	0	0	0	1	0	1	0	0
261	P84089	P84089	1	1	1	Enhancer of rudimentary homolog	Erh	sp|P84089|ERH_MOUSE Enhancer of rudimentary homolog OS=Mus musculus OX=10090 GN=Erh PE=1 SV=1	1	1	1	1	1	0	0	0	0	1	0	0	0	0	0	0	0	0	0	0	1	1	1	0	0	0	1	0	1	1	0	1	0	0	0	0	0	0	0	0	1
262	P84099	P84099	2	2	2	60S ribosomal protein L19	Rpl19	sp|P84099|RL19_MOUSE 60S ribosomal protein L19 OS=Mus musculus OX=10090 GN=Rpl19 PE=1 SV=1	1	2	2	2	0	1	0	0	0	1	1	0	0	0	0	2	0	0	0	0	1	1	0	0	1	0	1	0	0	0	1	0	0	0	0	1	0	1	0	0	1
263	P84104	P84104	2	2	1	Serine/arginine-rich splicing factor 3	Srsf3	sp|P84104|SRSF3_MOUSE Serine/arginine-rich splicing factor 3 OS=Mus musculus OX=10090 GN=Srsf3 PE=1 SV=1	1	2	2	1	0	0	1	0	0	1	1	0	0	1	1	0	0	0	0	0	0	0	2	0	0	0	0	0	1	0	2	1	0	0	1	1	0	1	0	1	1
264	P97315	P97315	1	1	1	Cysteine and glycine-rich protein 1	Csrp1	sp|P97315|CSRP1_MOUSE Cysteine and glycine-rich protein 1 OS=Mus musculus OX=10090 GN=Csrp1 PE=1 SV=3	1	1	1	1	1	1	1	0	0	1	1	0	0	0	0	0	0	1	0	0	0	1	0	0	1	1	0	0	1	0	0	0	0	0	1	0	1	1	0	0	0
265	P97351	P97351	3	3	3	40S ribosomal protein S3a	Rps3a	sp|P97351|RS3A_MOUSE 40S ribosomal protein S3a OS=Mus musculus OX=10090 GN=Rps3a PE=1 SV=3	1	3	3	3	0	0	1	1	1	0	1	2	1	0	2	0	0	0	1	0	1	0	2	1	1	1	0	1	1	2	0	1	0	1	0	2	1	1	1	0	1
266	P97371	P97371	7	7	7	Proteasome activator complex subunit 1	Psme1	sp|P97371|PSME1_MOUSE Proteasome activator complex subunit 1 OS=Mus musculus OX=10090 GN=Psme1 PE=1 SV=2	1	7	7	7	1	2	3	1	1	3	1	2	1	1	1	2	1	1	1	0	1	2	1	1	0	3	1	3	1	0	1	5	2	1	4	2	2	4	3	2	1
267	P97372	P97372	2	2	2	Proteasome activator complex subunit 2	Psme2	sp|P97372|PSME2_MOUSE Proteasome activator complex subunit 2 OS=Mus musculus OX=10090 GN=Psme2 PE=1 SV=4	1	2	2	2	1	0	0	0	0	0	1	0	0	1	0	0	1	0	0	0	0	0	1	0	1	0	1	0	0	0	0	0	0	1	0	0	0	0	1	0	0
268	P97384	P97384	4	4	4	Annexin A11	Anxa11	sp|P97384|ANX11_MOUSE Annexin A11 OS=Mus musculus OX=10090 GN=Anxa11 PE=1 SV=2	1	4	4	4	1	2	2	3	1	2	1	1	1	0	1	2	0	2	1	1	2	3	0	2	1	1	1	0	1	2	1	1	0	1	1	2	2	2	2	0	1
269	P97429	P97429	7	7	7	Annexin A4	Anxa4	sp|P97429|ANXA4_MOUSE Annexin A4 OS=Mus musculus OX=10090 GN=Anxa4 PE=1 SV=4	1	7	7	7	3	4	3	4	2	3	4	3	3	2	4	5	2	3	2	5	2	3	2	4	3	3	3	4	3	5	2	4	4	5	2	3	4	4	5	5	4
270	P97461	P97461	1	1	1	40S ribosomal protein S5;40S ribosomal protein S5, N-terminally processed	Rps5	sp|P97461|RS5_MOUSE 40S ribosomal protein S5 OS=Mus musculus OX=10090 GN=Rps5 PE=1 SV=3	1	1	1	1	0	0	1	0	0	0	1	0	0	1	1	0	1	1	0	1	1	1	1	0	0	0	0	0	1	0	1	1	0	1	1	0	0	0	0	1	0
271	P97805;Q9D8T0	P97805	3;1	3;1	3;1	Protein FAM3D	Fam3d	sp|P97805|FAM3D_MOUSE Protein FAM3D OS=Mus musculus OX=10090 GN=Fam3d PE=2 SV=2	2	3	3	3	2	2	1	2	3	2	1	1	2	2	0	2	2	1	1	1	2	1	2	2	2	0	1	1	1	1	2	1	1	1	2	2	2	2	1	2	2
272	P97807	P97807	3	3	3	Fumarate hydratase, mitochondrial	Fh	sp|P97807|FUMH_MOUSE Fumarate hydratase, mitochondrial OS=Mus musculus OX=10090 GN=Fh PE=1 SV=3	1	3	3	3	0	0	2	1	2	2	0	1	1	1	1	0	0	1	0	1	1	1	2	2	0	1	0	1	1	1	1	2	0	1	1	1	2	0	1	0	0
273	P97816	P97816	1	1	1	Protein S100-G	S100g	sp|P97816|S100G_MOUSE Protein S100-G OS=Mus musculus OX=10090 GN=S100g PE=1 SV=3	1	1	1	1	0	1	0	0	0	0	0	0	0	0	0	0	0	0	0	0	0	0	0	0	0	1	0	1	1	1	0	1	1	0	1	1	1	0	1	0	0
274	P99024	P99024	13	3	2	Tubulin beta-5 chain	Tubb5	sp|P99024|TBB5_MOUSE Tubulin beta-5 chain OS=Mus musculus OX=10090 GN=Tubb5 PE=1 SV=1	1	13	3	2	11	7	8	7	10	6	9	8	5	7	10	11	9	11	9	10	8	7	9	9	10	8	11	8	10	9	9	8	8	8	11	9	9	9	9	8	9
275	P99027	P99027	5	5	5	60S acidic ribosomal protein P2	Rplp2	sp|P99027|RLA2_MOUSE 60S acidic ribosomal protein P2 OS=Mus musculus OX=10090 GN=Rplp2 PE=1 SV=3	1	5	5	5	2	3	2	3	2	2	3	3	2	1	3	3	3	2	1	2	3	2	1	1	0	2	1	2	2	1	1	2	2	1	2	2	3	2	3	3	3
276	P99029	P99029	4	4	4	Peroxiredoxin-5, mitochondrial	Prdx5	sp|P99029|PRDX5_MOUSE Peroxiredoxin-5, mitochondrial OS=Mus musculus OX=10090 GN=Prdx5 PE=1 SV=2	1	4	4	4	1	0	0	2	2	1	1	1	1	2	1	1	2	2	1	2	0	1	2	0	2	2	1	3	0	1	0	2	1	1	2	2	2	0	1	2	1
277	Q00623;CON__P15497	Q00623	6;1	6;1	6;1	Apolipoprotein A-I;Proapolipoprotein A-I;Truncated apolipoprotein A-I	Apoa1	sp|Q00623|APOA1_MOUSE Apolipoprotein A-I OS=Mus musculus OX=10090 GN=Apoa1 PE=1 SV=2	2	6	6	6	1	0	0	0	0	0	0	0	0	1	1	0	0	0	1	0	0	0	0	0	0	0	1	1	2	0	0	0	1	1	2	1	1	1	0	2	0
278	Q00897;Q00898	Q00897	6;1	6;1	2;0	Alpha-1-antitrypsin 1-4	Serpina1d	sp|Q00897|A1AT4_MOUSE Alpha-1-antitrypsin 1-4 OS=Mus musculus OX=10090 GN=Serpina1d PE=1 SV=1	2	6	6	2	0	0	0	0	0	0	0	0	0	0	0	1	0	0	0	0	1	0	0	0	0	1	1	0	1	0	0	0	0	0	1	1	0	0	0	0	0
279	Q01768	Q01768	6	6	3	Nucleoside diphosphate kinase B	Nme2	sp|Q01768|NDKB_MOUSE Nucleoside diphosphate kinase B OS=Mus musculus OX=10090 GN=Nme2 PE=1 SV=1	1	6	6	3	2	4	1	1	2	1	1	1	2	2	2	2	0	2	2	2	2	3	2	3	1	2	2	0	2	0	2	2	1	2	2	0	3	0	0	2	3
280	Q01853	Q01853	8	8	8	Transitional endoplasmic reticulum ATPase	Vcp	sp|Q01853|TERA_MOUSE Transitional endoplasmic reticulum ATPase OS=Mus musculus OX=10090 GN=Vcp PE=1 SV=4	1	8	8	8	2	2	1	2	0	3	0	1	1	0	1	2	0	3	3	3	2	1	2	3	5	1	2	0	2	3	4	2	1	1	1	0	3	0	1	1	1
281	Q02053;P31254	Q02053	4;1	4;1	4;1	Ubiquitin-like modifier-activating enzyme 1	Uba1	sp|Q02053|UBA1_MOUSE Ubiquitin-like modifier-activating enzyme 1 OS=Mus musculus OX=10090 GN=Uba1 PE=1 SV=1	2	4	4	4	0	0	0	1	1	0	0	1	0	1	1	0	0	2	1	2	1	1	0	1	0	0	1	0	1	0	0	1	1	0	2	1	0	0	0	1	0
282	Q02819	Q02819	4	4	4	Nucleobindin-1	Nucb1	sp|Q02819|NUCB1_MOUSE Nucleobindin-1 OS=Mus musculus OX=10090 GN=Nucb1 PE=1 SV=2	1	4	4	4	0	0	0	1	1	0	0	0	0	0	0	0	1	0	0	0	0	0	0	0	0	0	0	1	1	0	0	0	0	0	0	0	1	0	0	0	0
283	Q03172	Q03172	1	1	1	Zinc finger protein 40	Hivep1	sp|Q03172|ZEP1_MOUSE Zinc finger protein 40 OS=Mus musculus OX=10090 GN=Hivep1 PE=1 SV=1	1	1	1	1	0	0	0	0	0	0	0	0	0	0	0	0	0	0	0	0	0	0	0	0	0	0	0	0	0	0	1	0	0	0	0	0	0	0	0	0	0
284	Q03265	Q03265	20	20	20	ATP synthase subunit alpha, mitochondrial	Atp5a1	sp|Q03265|ATPA_MOUSE ATP synthase subunit alpha, mitochondrial OS=Mus musculus OX=10090 GN=Atp5f1a PE=1 SV=1	1	20	20	20	12	14	13	13	13	12	13	13	10	12	10	11	12	9	8	12	12	13	13	10	8	10	11	10	8	10	12	10	9	11	8	12	12	13	12	11	11
285	Q04447	Q04447	7	7	7	Creatine kinase B-type	Ckb	sp|Q04447|KCRB_MOUSE Creatine kinase B-type OS=Mus musculus OX=10090 GN=Ckb PE=1 SV=1	1	7	7	7	2	1	3	3	0	0	0	3	0	2	4	4	1	3	2	0	2	1	3	2	4	2	1	3	3	4	5	1	3	3	1	3	2	1	2	3	1
286	Q06185	Q06185	2	2	2	ATP synthase subunit e, mitochondrial	Atp5i	sp|Q06185|ATP5I_MOUSE ATP synthase subunit e, mitochondrial OS=Mus musculus OX=10090 GN=Atp5me PE=1 SV=2	1	2	2	2	0	0	0	0	1	1	1	0	0	1	0	0	0	0	1	0	0	0	0	1	0	0	1	0	0	0	0	0	0	0	0	0	0	0	1	0	0
287	Q07417	Q07417	7	7	7	Short-chain specific acyl-CoA dehydrogenase, mitochondrial	Acads	sp|Q07417|ACADS_MOUSE Short-chain specific acyl-CoA dehydrogenase, mitochondrial OS=Mus musculus OX=10090 GN=Acads PE=1 SV=2	1	7	7	7	3	4	3	3	3	0	3	3	1	2	2	3	1	3	3	0	2	1	4	4	2	2	3	5	4	0	2	3	3	4	2	1	1	2	2	3	1
288	Q08091	Q08091	6	6	6	Calponin-1	Cnn1	sp|Q08091|CNN1_MOUSE Calponin-1 OS=Mus musculus OX=10090 GN=Cnn1 PE=1 SV=1	1	6	6	6	1	1	0	1	0	0	1	1	0	2	0	1	0	1	0	0	0	2	2	2	3	2	3	1	1	2	2	0	2	0	2	1	2	1	0	1	2
289	Q2KHK6;Q8CB12;Q3TR54	Q2KHK6	7;3;2	7;3;2	7;3;2	Gasdermin-C2	Gsdmc2	sp|Q2KHK6|GSDC2_MOUSE Gasdermin-C2 OS=Mus musculus OX=10090 GN=Gsdmc2 PE=2 SV=2	3	7	7	7	0	0	2	3	0	0	0	1	0	0	3	2	0	3	4	2	4	0	1	1	0	2	1	0	0	0	1	0	0	0	1	0	0	2	0	1	2
290	Q3THE2	Q3THE2	7	7	2	Myosin regulatory light chain 12B	Myl12b	sp|Q3THE2|ML12B_MOUSE Myosin regulatory light chain 12B OS=Mus musculus OX=10090 GN=Myl12b PE=1 SV=2	1	7	7	2	2	3	5	4	2	5	4	2	2	3	1	4	4	2	2	3	3	4	4	4	3	4	6	4	4	2	4	2	3	3	5	4	6	4	5	3	4
291	Q3UNX5	Q3UNX5	3	3	3	Acyl-coenzyme A synthetase ACSM3, mitochondrial	Acsm3	sp|Q3UNX5|ACSM3_MOUSE Acyl-coenzyme A synthetase ACSM3, mitochondrial OS=Mus musculus OX=10090 GN=Acsm3 PE=1 SV=2	1	3	3	3	0	0	0	0	0	1	1	0	0	0	0	0	1	0	0	0	1	0	0	0	0	0	0	0	0	0	0	0	0	0	0	0	0	0	0	0	0
292	Q3UZZ6;Q80VR3	Q3UZZ6	4;1	4;1	4;1	Sulfotransferase 1 family member D1	Sult1d1	sp|Q3UZZ6|ST1D1_MOUSE Sulfotransferase 1 family member D1 OS=Mus musculus OX=10090 GN=Sult1d1 PE=1 SV=1	2	4	4	4	2	1	1	0	0	0	1	0	0	0	0	0	0	0	1	0	0	0	0	1	0	0	1	0	1	1	0	0	0	1	1	1	1	1	2	0	0
293	Q3V0K9	Q3V0K9	3	3	2	Plastin-1	Pls1	sp|Q3V0K9|PLSI_MOUSE Plastin-1 OS=Mus musculus OX=10090 GN=Pls1 PE=1 SV=1	1	3	3	2	1	1	1	0	2	1	1	0	0	0	0	1	0	2	0	1	1	0	1	1	0	0	0	1	1	2	0	2	0	1	0	0	0	0	0	0	1
294	Q61656;Q501J6	Q61656;Q501J6	2;2	1;1	1;1	Probable ATP-dependent RNA helicase DDX5;Probable ATP-dependent RNA helicase DDX17	Ddx5;Ddx17	sp|Q61656|DDX5_MOUSE Probable ATP-dependent RNA helicase DDX5 OS=Mus musculus OX=10090 GN=Ddx5 PE=1 SV=2;sp|Q501J6|DDX17_MOUSE Probable ATP-dependent RNA helicase DDX17 OS=Mus musculus OX=10090 GN=Ddx17 PE=1 SV=1	2	2	1	1	1	0	0	0	0	0	0	1	1	0	0	1	1	0	1	0	0	0	0	0	0	1	1	0	0	1	0	0	1	0	0	1	0	1	0	0	0
295	Q5BKQ4	Q5BKQ4	6	6	6	Inactive pancreatic lipase-related protein 1	Pnliprp1	sp|Q5BKQ4|LIPR1_MOUSE Inactive pancreatic lipase-related protein 1 OS=Mus musculus OX=10090 GN=Pnliprp1 PE=1 SV=2	1	6	6	6	1	0	0	0	1	1	0	0	0	1	0	0	0	0	2	0	2	0	0	0	0	0	0	0	0	1	0	0	0	0	0	0	0	0	0	1	1
296	Q5XJY5	Q5XJY5	2	2	2	Coatomer subunit delta	Arcn1	sp|Q5XJY5|COPD_MOUSE Coatomer subunit delta OS=Mus musculus OX=10090 GN=Arcn1 PE=1 SV=2	1	2	2	2	0	0	0	1	0	0	0	0	0	1	0	0	0	0	2	0	1	2	1	0	0	0	0	0	1	0	0	0	1	0	0	1	0	0	2	0	2
297	Q60597	Q60597	6	6	6	2-oxoglutarate dehydrogenase, mitochondrial	Ogdh	sp|Q60597|ODO1_MOUSE 2-oxoglutarate dehydrogenase, mitochondrial OS=Mus musculus OX=10090 GN=Ogdh PE=1 SV=3	1	6	6	6	1	0	0	0	1	0	2	2	0	0	1	1	1	1	0	1	1	0	0	0	0	1	1	0	1	1	0	2	1	1	1	0	0	1	0	0	1
298	Q60604	Q60604	6	6	6	Adseverin	Scin	sp|Q60604|ADSV_MOUSE Adseverin OS=Mus musculus OX=10090 GN=Scin PE=1 SV=3	1	6	6	6	0	1	0	0	0	0	0	1	1	0	2	3	0	3	4	1	2	0	1	0	0	0	0	0	0	0	0	0	0	1	0	0	0	0	0	0	1
299	Q60605;Q8CI43	Q60605	6;1	6;1	6;1	Myosin light polypeptide 6	Myl6	sp|Q60605|MYL6_MOUSE Myosin light polypeptide 6 OS=Mus musculus OX=10090 GN=Myl6 PE=1 SV=3	2	6	6	6	4	5	6	5	5	3	4	4	3	2	6	4	6	5	3	5	4	5	4	4	4	3	5	2	6	3	4	5	5	2	5	4	5	6	3	5	5
300	Q60668;Q9Z130	Q60668	3;1	3;1	3;1	Heterogeneous nuclear ribonucleoprotein D0	Hnrnpd	sp|Q60668|HNRPD_MOUSE Heterogeneous nuclear ribonucleoprotein D0 OS=Mus musculus OX=10090 GN=Hnrnpd PE=1 SV=2	2	3	3	3	1	1	0	1	1	0	2	0	1	0	1	0	1	0	0	0	0	1	1	2	1	2	1	0	1	1	2	1	1	1	1	1	1	1	1	0	0
301	Q60854	Q60854	4	4	4	Serpin B6	Serpinb6	sp|Q60854|SPB6_MOUSE Serpin B6 OS=Mus musculus OX=10090 GN=Serpinb6 PE=1 SV=1	1	4	4	4	1	2	1	1	0	0	2	0	2	0	2	2	0	1	2	1	2	3	1	0	2	2	2	1	2	2	2	2	0	1	2	0	1	3	1	1	2
302	Q60864	Q60864	2	2	2	Stress-induced-phosphoprotein 1	Stip1	sp|Q60864|STIP1_MOUSE Stress-induced-phosphoprotein 1 OS=Mus musculus OX=10090 GN=Stip1 PE=1 SV=1	1	2	2	2	0	0	0	0	0	0	0	0	0	0	1	0	0	1	0	0	0	0	0	1	0	0	1	0	0	0	0	0	1	0	0	0	0	0	0	0	0
303	Q60930	Q60930	6	6	6	Voltage-dependent anion-selective channel protein 2	Vdac2	sp|Q60930|VDAC2_MOUSE Voltage-dependent anion-selective channel protein 2 OS=Mus musculus OX=10090 GN=Vdac2 PE=1 SV=2	1	6	6	6	3	3	4	2	2	2	3	2	2	2	3	4	3	4	1	1	3	3	3	2	2	1	2	4	2	2	3	4	2	4	3	3	3	2	3	2	2
304	Q60931	Q60931	2	2	2	Voltage-dependent anion-selective channel protein 3	Vdac3	sp|Q60931|VDAC3_MOUSE Voltage-dependent anion-selective channel protein 3 OS=Mus musculus OX=10090 GN=Vdac3 PE=1 SV=1	1	2	2	2	0	1	1	1	0	0	1	1	0	1	0	1	1	0	0	0	0	1	1	0	0	0	1	0	0	1	1	0	0	0	0	0	1	0	0	1	0
305	Q60932	Q60932	6	6	6	Voltage-dependent anion-selective channel protein 1	Vdac1	sp|Q60932|VDAC1_MOUSE Voltage-dependent anion-selective channel protein 1 OS=Mus musculus OX=10090 GN=Vdac1 PE=1 SV=3	1	6	6	6	4	3	5	3	3	4	4	4	3	3	2	5	5	4	1	2	3	3	2	4	3	2	3	2	3	2	4	5	4	5	4	2	4	3	4	4	5
306	Q61171	Q61171	5	5	5	Peroxiredoxin-2	Prdx2	sp|Q61171|PRDX2_MOUSE Peroxiredoxin-2 OS=Mus musculus OX=10090 GN=Prdx2 PE=1 SV=3	1	5	5	5	3	0	1	0	1	1	0	1	0	0	1	1	0	1	1	0	1	1	1	0	1	3	1	0	0	1	0	1	1	0	2	1	2	1	1	1	1
307	Q61207	Q61207	2	2	2	Prosaposin	Psap	sp|Q61207|SAP_MOUSE Prosaposin OS=Mus musculus OX=10090 GN=Psap PE=1 SV=2	1	2	2	2	0	1	0	0	0	0	0	0	0	0	0	0	0	0	0	0	0	0	0	0	0	1	0	1	0	0	1	0	0	0	0	0	2	0	0	0	0
308	Q61233;Q99K51	Q61233;Q99K51	3;2	2;1	2;1	Plastin-2;Plastin-3	Lcp1;Pls3	sp|Q61233|PLSL_MOUSE Plastin-2 OS=Mus musculus OX=10090 GN=Lcp1 PE=1 SV=4;sp|Q99K51|PLST_MOUSE Plastin-3 OS=Mus musculus OX=10090 GN=Pls3 PE=1 SV=3	2	3	2	2	1	1	3	2	2	0	1	0	0	0	0	1	0	0	0	1	1	0	2	1	0	0	1	1	0	1	0	1	0	1	2	0	0	0	0	0	3
309	Q61425	Q61425	3	3	3	Hydroxyacyl-coenzyme A dehydrogenase, mitochondrial	Hadh	sp|Q61425|HCDH_MOUSE Hydroxyacyl-coenzyme A dehydrogenase, mitochondrial OS=Mus musculus OX=10090 GN=Hadh PE=1 SV=2	1	3	3	3	1	1	0	0	1	1	2	1	1	1	1	2	1	1	0	1	1	1	1	1	0	1	1	1	1	1	1	1	1	1	0	0	1	1	1	1	1
310	Q61598;P50396	Q61598	9;3	9;3	9;3	Rab GDP dissociation inhibitor beta	Gdi2	sp|Q61598|GDIB_MOUSE Rab GDP dissociation inhibitor beta OS=Mus musculus OX=10090 GN=Gdi2 PE=1 SV=1	2	9	9	9	5	2	2	1	3	2	2	1	3	3	1	2	3	1	2	2	1	3	2	3	4	2	3	2	3	3	1	2	1	2	0	0	1	2	1	4	3
311	Q61753	Q61753	4	4	4	D-3-phosphoglycerate dehydrogenase	Phgdh	sp|Q61753|SERA_MOUSE D-3-phosphoglycerate dehydrogenase OS=Mus musculus OX=10090 GN=Phgdh PE=1 SV=3	1	4	4	4	0	0	1	0	0	0	0	0	0	0	0	0	0	0	0	1	0	0	0	0	0	0	0	0	0	0	0	0	0	0	0	0	0	0	0	0	0
312	Q61792	Q61792	1	1	1	LIM and SH3 domain protein 1	Lasp1	sp|Q61792|LASP1_MOUSE LIM and SH3 domain protein 1 OS=Mus musculus OX=10090 GN=Lasp1 PE=1 SV=1	1	1	1	1	0	0	0	0	0	0	0	0	0	0	0	0	0	0	0	0	0	0	0	0	0	0	0	0	0	0	0	0	0	0	0	0	0	0	0	0	0
313	Q62036	Q62036	1	1	1	Centrosomal protein of 131 kDa	Cep131	sp|Q62036|CP131_MOUSE Centrosomal protein of 131 kDa OS=Mus musculus OX=10090 GN=Cep131 PE=1 SV=2	1	1	1	1	0	0	0	0	0	0	0	0	0	0	0	0	0	0	0	0	0	0	0	0	0	0	0	0	0	0	0	0	0	0	0	0	0	0	0	0	0
314	Q62186	Q62186	1	1	1	Translocon-associated protein subunit delta	Ssr4	sp|Q62186|SSRD_MOUSE Translocon-associated protein subunit delta OS=Mus musculus OX=10090 GN=Ssr4 PE=1 SV=1	1	1	1	1	0	0	1	0	0	0	1	0	1	0	0	0	0	0	1	0	0	0	1	1	0	0	1	1	0	0	0	0	0	0	0	0	0	0	0	1	0
315	Q62189	Q62189	1	1	1	U1 small nuclear ribonucleoprotein A	Snrpa	sp|Q62189|SNRPA_MOUSE U1 small nuclear ribonucleoprotein A OS=Mus musculus OX=10090 GN=Snrpa PE=1 SV=3	1	1	1	1	0	0	0	0	0	0	0	0	0	0	0	0	0	0	0	0	0	0	0	0	0	0	0	0	0	0	0	0	0	0	0	0	0	0	0	0	0
316	Q62393	Q62393	3	3	3	Tumor protein D52	Tpd52	sp|Q62393|TPD52_MOUSE Tumor protein D52 OS=Mus musculus OX=10090 GN=Tpd52 PE=1 SV=2	1	3	3	3	0	0	2	0	1	0	1	1	1	2	1	0	1	2	1	0	0	2	1	1	0	0	0	1	1	1	0	1	0	0	2	2	2	2	0	1	0
317	Q62425	Q62425	2	2	2	Cytochrome c oxidase subunit NDUFA4	Ndufa4	sp|Q62425|NDUA4_MOUSE Cytochrome c oxidase subunit NDUFA4 OS=Mus musculus OX=10090 GN=Ndufa4 PE=1 SV=2	1	2	2	2	1	2	1	2	0	1	2	0	2	1	1	1	1	2	0	1	1	2	2	0	1	1	2	2	2	1	2	1	2	2	1	1	0	1	0	1	2
318	Q62468	Q62468	15	15	15	Villin-1	Vil1	sp|Q62468|VILI_MOUSE Villin-1 OS=Mus musculus OX=10090 GN=Vil1 PE=1 SV=3	1	15	15	15	5	4	5	2	3	6	4	4	6	3	8	4	1	8	2	2	2	3	7	5	3	2	4	2	3	4	4	6	6	6	3	4	1	4	2	4	5
319	Q62520	Q62520	1	1	1	Zinc finger protein ZIC 2	Zic2	sp|Q62520|ZIC2_MOUSE Zinc finger protein ZIC 2 OS=Mus musculus OX=10090 GN=Zic2 PE=1 SV=2	1	1	1	1	0	1	0	0	0	0	1	0	1	0	0	0	0	0	0	0	0	0	0	0	0	0	0	0	0	0	0	0	1	1	0	0	0	0	0	0	0
320	Q63844	Q63844	2	2	2	Mitogen-activated protein kinase 3	Mapk3	sp|Q63844|MK03_MOUSE Mitogen-activated protein kinase 3 OS=Mus musculus OX=10090 GN=Mapk3 PE=1 SV=5	1	2	2	2	1	1	1	0	1	0	1	1	1	0	0	0	0	1	1	1	1	1	1	1	1	1	1	0	0	1	0	0	1	0	1	1	1	1	0	1	1
321	Q64133	Q64133	8	8	8	Amine oxidase [flavin-containing] A	Maoa	sp|Q64133|AOFA_MOUSE Amine oxidase [flavin-containing] A OS=Mus musculus OX=10090 GN=Maoa PE=1 SV=3	1	8	8	8	4	1	2	2	2	1	4	4	4	2	3	4	2	5	2	3	1	1	0	4	2	2	3	1	1	3	1	3	2	0	0	2	2	5	2	3	3
322	Q64285	Q64285	4	4	4	Bile salt-activated lipase	Cel	sp|Q64285|CEL_MOUSE Bile salt-activated lipase OS=Mus musculus OX=10090 GN=Cel PE=1 SV=1	1	4	4	4	0	0	0	0	0	1	0	0	0	1	0	0	0	0	1	3	2	0	0	0	1	0	0	0	0	0	0	1	0	0	0	0	0	1	0	1	0
323	Q64433	Q64433	5	5	5	10 kDa heat shock protein, mitochondrial	Hspe1	sp|Q64433|CH10_MOUSE 10 kDa heat shock protein, mitochondrial OS=Mus musculus OX=10090 GN=Hspe1 PE=1 SV=2	1	5	5	5	2	3	4	2	4	4	2	3	2	2	2	1	3	3	3	3	3	3	2	2	2	3	2	2	3	2	3	3	3	1	4	2	3	1	3	2	3
324	Q64523;Q6GSS7;Q64522	Q64523;Q6GSS7;Q64522	4;4;2	1;1;1	1;1;1	Histone H2A type 2-C;Histone H2A type 2-A;Histone H2A type 2-B	Hist2h2ac;Hist2h2aa1;Hist2h2ab	sp|Q64523|H2A2C_MOUSE Histone H2A type 2-C OS=Mus musculus OX=10090 GN=H2ac20 PE=1 SV=3;sp|Q6GSS7|H2A2A_MOUSE Histone H2A type 2-A OS=Mus musculus OX=10090 GN=Hist2h2aa1 PE=1 SV=3;sp|Q64522|H2A2B_MOUSE Histone H2A type 2-B OS=Mus musculus OX=10090 GN=H2ac2	3	4	1	1	3	3	3	3	3	3	3	3	3	4	3	3	3	3	3	3	3	3	3	3	3	3	3	3	3	3	3	3	3	3	3	3	3	3	3	3	3
325	Q64727	Q64727	3	3	3	Vinculin	Vcl	sp|Q64727|VINC_MOUSE Vinculin OS=Mus musculus OX=10090 GN=Vcl PE=1 SV=4	1	3	3	3	0	0	0	0	0	0	0	0	0	0	0	0	0	0	0	0	0	0	0	0	0	0	0	0	1	0	0	0	0	0	0	1	1	0	0	0	0
326	Q64GA5	Q64GA5	5	5	5		Pla2g4c	sp|Q64GA5|PA24C_MOUSE Cytosolic phospholipase A2 gamma OS=Mus musculus OX=10090 GN=Pla2g4c PE=1 SV=1	1	5	5	5	0	0	1	2	0	0	1	0	0	0	1	4	0	5	4	2	3	0	1	2	0	0	0	0	0	0	0	0	0	0	0	0	1	1	1	0	0
327	Q68FD5	Q68FD5	5	5	5	Clathrin heavy chain 1	Cltc	sp|Q68FD5|CLH1_MOUSE Clathrin heavy chain 1 OS=Mus musculus OX=10090 GN=Cltc PE=1 SV=3	1	5	5	5	1	1	0	0	1	0	0	1	1	0	2	2	1	2	0	1	3	2	2	2	2	1	0	0	2	1	2	4	1	2	0	0	0	1	0	1	0
328	Q6IRU2	Q6IRU2	2	2	2	Tropomyosin alpha-4 chain	Tpm4	sp|Q6IRU2|TPM4_MOUSE Tropomyosin alpha-4 chain OS=Mus musculus OX=10090 GN=Tpm4 PE=1 SV=3	1	2	2	2	1	1	1	1	1	0	0	0	0	0	0	0	1	0	0	0	0	1	2	2	0	0	1	0	0	0	1	1	1	1	1	1	0	0	1	0	1
329	Q6P069	Q6P069	5	5	5	Sorcin	Sri	sp|Q6P069|SORCN_MOUSE Sorcin OS=Mus musculus OX=10090 GN=Sri PE=1 SV=1	1	5	5	5	0	1	0	0	1	2	0	1	0	0	1	1	0	1	2	0	2	1	2	0	1	2	2	0	1	2	2	1	1	0	2	0	2	0	0	2	1
330	Q6P8U6	Q6P8U6	7	7	7	Pancreatic triacylglycerol lipase	Pnlip	sp|Q6P8U6|LIPP_MOUSE Pancreatic triacylglycerol lipase OS=Mus musculus OX=10090 GN=Pnlip PE=1 SV=1	1	7	7	7	0	0	0	0	0	1	1	0	0	0	0	1	0	0	6	4	2	0	0	0	0	0	1	0	1	0	0	0	0	0	0	0	0	0	0	0	3
331	Q6PDN3	Q6PDN3	2	2	2	Myosin light chain kinase, smooth muscle;Myosin light chain kinase, smooth muscle, deglutamylated form	Mylk	sp|Q6PDN3|MYLK_MOUSE Myosin light chain kinase, smooth muscle OS=Mus musculus OX=10090 GN=Mylk PE=1 SV=3	1	2	2	2	2	0	2	1	2	1	0	0	0	0	1	2	2	1	1	0	1	2	1	1	2	0	1	0	2	1	1	0	1	1	1	2	2	1	1	1	1
332	Q6URW6	Q6URW6	5	4	4	Myosin-14	Myh14	sp|Q6URW6|MYH14_MOUSE Myosin-14 OS=Mus musculus OX=10090 GN=Myh14 PE=1 SV=1	1	5	4	4	2	1	1	0	0	0	0	2	0	0	5	1	1	2	1	1	1	1	1	3	1	2	1	1	2	2	0	0	2	1	2	2	0	0	2	0	1
333	Q6ZQM8;Q62452;Q64435;P70691	Q6ZQM8;Q62452	6;3;2;2	6;3;2;2	4;1;0;0	UDP-glucuronosyltransferase 1-7C;UDP-glucuronosyltransferase 1-9	Ugt1a7c;Ugt1a9	sp|Q6ZQM8|UD17C_MOUSE UDP-glucuronosyltransferase 1-7C OS=Mus musculus OX=10090 GN=Ugt1a7c PE=1 SV=1;sp|Q62452|UD19_MOUSE UDP-glucuronosyltransferase 1-9 OS=Mus musculus OX=10090 GN=Ugt1a9 PE=1 SV=3	4	6	6	4	2	2	0	2	3	2	2	2	1	1	3	1	3	3	2	2	0	2	2	0	2	1	2	1	2	1	2	2	4	1	4	3	1	3	3	2	0
334	Q6ZWN5	Q6ZWN5	5	5	5	40S ribosomal protein S9	Rps9	sp|Q6ZWN5|RS9_MOUSE 40S ribosomal protein S9 OS=Mus musculus OX=10090 GN=Rps9 PE=1 SV=3	1	5	5	5	1	0	1	1	2	1	1	0	3	1	1	1	0	1	1	1	1	1	1	1	1	1	1	0	1	0	1	0	1	0	1	1	1	2	1	1	2
335	Q6ZWV3;P86048	Q6ZWV3;P86048	2;1	2;1	2;1	60S ribosomal protein L10;60S ribosomal protein L10-like	Rpl10;Rpl10l	sp|Q6ZWV3|RL10_MOUSE 60S ribosomal protein L10 OS=Mus musculus OX=10090 GN=Rpl10 PE=1 SV=3;sp|P86048|RL10L_MOUSE 60S ribosomal protein L10-like OS=Mus musculus OX=10090 GN=Rpl10l PE=2 SV=1	2	2	2	2	0	0	0	0	1	0	1	1	0	1	0	1	0	1	1	1	0	0	1	1	1	1	1	0	0	0	0	1	0	0	0	0	1	1	1	2	1
336	Q78IK2	Q78IK2	1	1	1	Up-regulated during skeletal muscle growth protein 5	Usmg5	sp|Q78IK2|ATPMD_MOUSE ATP synthase membrane subunit DAPIT, mitochondrial OS=Mus musculus OX=10090 GN=Atp5md PE=1 SV=1	1	1	1	1	1	0	0	0	0	0	0	0	0	0	1	1	0	0	0	1	1	1	0	1	0	0	0	0	0	0	0	1	1	0	0	0	0	0	0	0	0
337	Q7TMK9	Q7TMK9	2	2	2	Heterogeneous nuclear ribonucleoprotein Q	Syncrip	sp|Q7TMK9|HNRPQ_MOUSE Heterogeneous nuclear ribonucleoprotein Q OS=Mus musculus OX=10090 GN=Syncrip PE=1 SV=2	1	2	2	2	0	0	0	0	0	1	1	0	0	0	0	0	0	0	0	0	0	0	0	0	0	0	0	0	0	0	1	1	1	1	0	0	0	0	1	0	1
338	Q9CWF2;Q7TMM9	Q9CWF2;Q7TMM9	11;11	1;1	1;1	Tubulin beta-2B chain;Tubulin beta-2A chain	Tubb2b;Tubb2a	sp|Q9CWF2|TBB2B_MOUSE Tubulin beta-2B chain OS=Mus musculus OX=10090 GN=Tubb2b PE=1 SV=1;sp|Q7TMM9|TBB2A_MOUSE Tubulin beta-2A chain OS=Mus musculus OX=10090 GN=Tubb2a PE=1 SV=1	2	11	1	1	8	5	8	4	9	4	7	6	3	5	7	8	6	8	7	8	6	6	7	7	8	7	9	6	7	6	7	6	6	5	8	7	7	7	8	7	6
339	Q7TNC6	Q7TNC6	1	1	1	Kinesin-like protein KIF26B	Kif26b	sp|Q7TNC6|KI26B_MOUSE Kinesin-like protein KIF26B OS=Mus musculus OX=10090 GN=Kif26b PE=1 SV=3	1	1	1	1	0	1	0	0	0	0	1	1	0	0	0	1	0	0	0	0	1	1	1	1	0	0	0	0	0	1	1	0	1	0	0	0	0	0	0	0	0
340	Q7TPZ8	Q7TPZ8	9	9	8	Carboxypeptidase A1	Cpa1	sp|Q7TPZ8|CBPA1_MOUSE Carboxypeptidase A1 OS=Mus musculus OX=10090 GN=Cpa1 PE=1 SV=1	1	9	9	8	0	1	0	0	0	0	0	0	0	0	0	1	0	0	3	4	1	1	0	0	0	0	0	0	0	1	0	2	0	0	0	0	0	2	0	2	2
341	Q80X90;Q8VHX6	Q80X90	5;1	4;0	4;0	Filamin-B	Flnb	sp|Q80X90|FLNB_MOUSE Filamin-B OS=Mus musculus OX=10090 GN=Flnb PE=1 SV=3	2	5	4	4	0	1	0	0	1	0	0	1	0	0	0	1	2	1	2	0	1	1	1	1	1	1	1	0	1	0	1	1	2	1	0	1	0	1	1	0	1
342	Q80XN0	Q80XN0	4	4	4	D-beta-hydroxybutyrate dehydrogenase, mitochondrial	Bdh1	sp|Q80XN0|BDH_MOUSE D-beta-hydroxybutyrate dehydrogenase, mitochondrial OS=Mus musculus OX=10090 GN=Bdh1 PE=1 SV=2	1	4	4	4	1	1	2	0	1	2	1	1	0	1	2	1	2	1	2	1	2	1	1	0	0	1	2	2	2	1	1	2	0	2	1	2	2	1	1	1	1
343	Q80Y14	Q80Y14	1	1	1	Glutaredoxin-related protein 5, mitochondrial	Glrx5	sp|Q80Y14|GLRX5_MOUSE Glutaredoxin-related protein 5, mitochondrial OS=Mus musculus OX=10090 GN=Glrx5 PE=1 SV=2	1	1	1	1	0	0	0	0	0	1	1	0	0	0	0	0	0	0	0	0	0	0	0	0	0	0	0	0	0	0	0	0	0	0	0	0	0	0	0	0	0
344	Q80Z19	Q80Z19	4	4	4	Mucin-2	Muc2	sp|Q80Z19|MUC2_MOUSE Mucin-2 (Fragments) OS=Mus musculus OX=10090 GN=Muc2 PE=1 SV=2	1	4	4	4	1	1	1	0	1	0	1	0	0	0	3	1	0	2	2	0	1	3	0	1	0	0	0	1	1	0	0	1	1	0	0	1	1	0	0	3	1
345	Q810Q5	Q810Q5	2	2	2	Normal mucosa of esophagus-specific gene 1 protein	Nmes1	sp|Q810Q5|NMES1_MOUSE Normal mucosa of esophagus-specific gene 1 protein OS=Mus musculus OX=10090 GN=Nmes1 PE=1 SV=1	1	2	2	2	0	0	1	0	0	0	0	1	0	0	1	1	0	0	1	0	2	1	1	1	2	0	0	0	1	1	1	0	1	1	0	0	1	1	0	1	1
346	Q8BFR5	Q8BFR5	6	6	6	Elongation factor Tu, mitochondrial	Tufm	sp|Q8BFR5|EFTU_MOUSE Elongation factor Tu, mitochondrial OS=Mus musculus OX=10090 GN=Tufm PE=1 SV=1	1	6	6	6	0	2	0	1	2	0	3	0	0	0	0	1	0	1	1	1	1	1	1	1	0	0	1	0	4	0	1	1	0	0	1	0	1	0	1	0	1
347	Q8BFZ3	Q8BFZ3	6	1	1	Beta-actin-like protein 2	Actbl2	sp|Q8BFZ3|ACTBL_MOUSE Beta-actin-like protein 2 OS=Mus musculus OX=10090 GN=Actbl2 PE=1 SV=1	1	6	1	1	4	4	5	4	4	4	5	4	5	4	3	5	4	5	5	5	4	4	4	5	5	5	4	3	6	4	4	5	5	4	6	4	4	5	4	4	5
348	Q8BG05	Q8BG05	4	4	4	Heterogeneous nuclear ribonucleoprotein A3	Hnrnpa3	sp|Q8BG05|ROA3_MOUSE Heterogeneous nuclear ribonucleoprotein A3 OS=Mus musculus OX=10090 GN=Hnrnpa3 PE=1 SV=1	1	4	4	4	3	4	1	3	1	3	2	2	3	3	0	3	3	2	2	2	1	1	2	2	1	3	2	3	2	3	1	2	2	3	1	3	3	1	2	1	3
349	Q8BG32	Q8BG32	1	1	1	26S proteasome non-ATPase regulatory subunit 11	Psmd11	sp|Q8BG32|PSD11_MOUSE 26S proteasome non-ATPase regulatory subunit 11 OS=Mus musculus OX=10090 GN=Psmd11 PE=1 SV=3	1	1	1	1	0	0	0	0	0	0	0	0	0	0	0	0	0	0	0	0	0	0	0	0	0	0	0	0	0	0	0	0	0	0	0	0	0	0	0	0	0
350	Q8BGJ9;Q9D883	Q8BGJ9;Q9D883	1;1	1;1	1;1	Splicing factor U2AF 26 kDa subunit;Splicing factor U2AF 35 kDa subunit	U2af1l4;U2af1	sp|Q8BGJ9|U2AF4_MOUSE Splicing factor U2AF 26 kDa subunit OS=Mus musculus OX=10090 GN=U2af1l4 PE=1 SV=1;sp|Q9D883|U2AF1_MOUSE Splicing factor U2AF 35 kDa subunit OS=Mus musculus OX=10090 GN=U2af1 PE=1 SV=4	2	1	1	1	0	0	0	0	0	0	0	0	0	0	0	0	0	0	0	0	0	0	0	0	0	0	0	0	0	0	0	0	0	0	0	0	0	0	0	0	0
351	Q8BH04	Q8BH04	1	1	1	Phosphoenolpyruvate carboxykinase [GTP], mitochondrial	Pck2	sp|Q8BH04|PCKGM_MOUSE Phosphoenolpyruvate carboxykinase [GTP], mitochondrial OS=Mus musculus OX=10090 GN=Pck2 PE=1 SV=1	1	1	1	1	0	0	0	0	1	0	0	0	0	0	0	0	0	0	0	1	0	0	1	0	0	0	0	0	0	0	0	0	0	0	0	0	0	0	0	0	0
352	Q8BH95	Q8BH95	3	3	3	Enoyl-CoA hydratase, mitochondrial	Echs1	sp|Q8BH95|ECHM_MOUSE Enoyl-CoA hydratase, mitochondrial OS=Mus musculus OX=10090 GN=Echs1 PE=1 SV=1	1	3	3	3	1	1	0	1	0	1	0	0	1	0	1	0	0	1	0	1	1	1	0	1	0	0	1	0	0	1	1	1	2	0	1	0	0	0	0	1	1
353	Q8BHN3	Q8BHN3	3	3	3	Neutral alpha-glucosidase AB	Ganab	sp|Q8BHN3|GANAB_MOUSE Neutral alpha-glucosidase AB OS=Mus musculus OX=10090 GN=Ganab PE=1 SV=1	1	3	3	3	1	0	0	0	0	0	0	0	0	0	0	1	0	0	0	0	0	0	1	0	0	0	0	0	0	0	0	0	0	1	0	1	0	0	0	0	0
354	Q8BK48;Q91WG0	Q8BK48	3;1	3;1	3;1	Pyrethroid hydrolase Ces2e	Ces2e	sp|Q8BK48|EST2E_MOUSE Pyrethroid hydrolase Ces2e OS=Mus musculus OX=10090 GN=Ces2e PE=1 SV=1	2	3	3	3	0	0	0	1	0	0	0	0	0	1	0	0	0	0	0	0	0	0	0	0	0	1	1	0	0	0	1	0	0	0	0	0	0	0	0	1	0
355	Q8BMD8	Q8BMD8	3	3	3	Calcium-binding mitochondrial carrier protein SCaMC-1	Slc25a24	sp|Q8BMD8|SCMC1_MOUSE Calcium-binding mitochondrial carrier protein SCaMC-1 OS=Mus musculus OX=10090 GN=Slc25a24 PE=1 SV=1	1	3	3	3	0	0	0	1	0	0	1	0	0	0	0	1	0	0	0	1	0	0	1	1	1	0	0	0	0	0	1	1	0	0	0	0	0	0	0	0	1
356	Q8BMS1	Q8BMS1	12	12	12	Trifunctional enzyme subunit alpha, mitochondrial;Long-chain enoyl-CoA hydratase;Long chain 3-hydroxyacyl-CoA dehydrogenase	Hadha	sp|Q8BMS1|ECHA_MOUSE Trifunctional enzyme subunit alpha, mitochondrial OS=Mus musculus OX=10090 GN=Hadha PE=1 SV=1	1	12	12	12	1	2	2	0	1	1	2	2	2	1	1	0	1	6	1	2	0	3	1	1	3	0	2	2	1	2	1	3	2	5	1	1	1	3	0	2	2
357	Q8BP67	Q8BP67	3	3	3	60S ribosomal protein L24	Rpl24	sp|Q8BP67|RL24_MOUSE 60S ribosomal protein L24 OS=Mus musculus OX=10090 GN=Rpl24 PE=1 SV=2	1	3	3	3	1	1	1	2	1	1	1	2	1	1	2	2	1	2	1	1	1	2	3	1	1	0	1	2	1	1	1	2	1	2	1	1	2	2	2	2	1
358	Q8BTM8	Q8BTM8	6	6	5	Filamin-A	Flna	sp|Q8BTM8|FLNA_MOUSE Filamin-A OS=Mus musculus OX=10090 GN=Flna PE=1 SV=5	1	6	6	5	0	1	0	0	1	0	1	2	0	0	0	1	1	0	1	0	1	0	1	1	2	1	2	0	2	0	2	1	0	1	0	0	0	2	1	0	0
359	Q8BWT1	Q8BWT1	4	4	4	3-ketoacyl-CoA thiolase, mitochondrial	Acaa2	sp|Q8BWT1|THIM_MOUSE 3-ketoacyl-CoA thiolase, mitochondrial OS=Mus musculus OX=10090 GN=Acaa2 PE=1 SV=3	1	4	4	4	3	1	1	2	1	0	1	1	0	0	1	0	0	1	1	1	0	0	1	1	1	0	0	1	1	2	2	1	0	0	0	1	2	0	1	0	0
360	Q8C170	Q8C170	2	2	2	Unconventional myosin-IXa	Myo9a	sp|Q8C170|MYO9A_MOUSE Unconventional myosin-IXa OS=Mus musculus OX=10090 GN=Myo9a PE=1 SV=2	1	2	2	2	0	0	0	0	0	0	0	0	0	0	0	0	0	0	0	0	0	0	0	0	0	0	0	0	0	0	0	0	0	0	0	0	0	0	0	0	0
361	Q8CCS6	Q8CCS6	1	1	1	Polyadenylate-binding protein 2	Pabpn1	sp|Q8CCS6|PABP2_MOUSE Polyadenylate-binding protein 2 OS=Mus musculus OX=10090 GN=Pabpn1 PE=1 SV=3	1	1	1	1	0	1	0	0	0	0	0	0	0	0	0	0	0	0	0	1	0	0	0	0	0	0	1	0	0	0	1	1	0	0	0	0	1	0	1	0	0
362	Q8CGK3	Q8CGK3	2	2	2	Lon protease homolog, mitochondrial	Lonp1	sp|Q8CGK3|LONM_MOUSE Lon protease homolog, mitochondrial OS=Mus musculus OX=10090 GN=Lonp1 PE=1 SV=2	1	2	2	2	0	1	0	0	0	0	0	0	0	0	0	0	0	0	1	0	0	0	0	0	0	0	0	0	0	1	0	0	1	0	0	0	1	0	0	0	1
363	Q8CI94	Q8CI94	3	3	3	Glycogen phosphorylase, brain form	Pygb	sp|Q8CI94|PYGB_MOUSE Glycogen phosphorylase, brain form OS=Mus musculus OX=10090 GN=Pygb PE=1 SV=3	1	3	3	3	1	0	0	1	0	0	0	0	0	0	1	1	0	1	0	0	0	0	0	1	1	0	0	0	1	0	1	1	1	0	1	0	0	0	0	0	0
364	Q8CIE6	Q8CIE6	3	3	3	Coatomer subunit alpha;Xenin;Proxenin	Copa	sp|Q8CIE6|COPA_MOUSE Coatomer subunit alpha OS=Mus musculus OX=10090 GN=Copa PE=1 SV=2	1	3	3	3	0	0	0	0	0	0	0	0	0	0	1	0	0	0	0	0	0	0	0	0	0	0	0	0	0	0	0	0	0	1	0	0	0	0	0	0	0
365	Q8K0C5	Q8K0C5	4	4	4	Zymogen granule membrane protein 16	Zg16	sp|Q8K0C5|ZG16_MOUSE Zymogen granule membrane protein 16 OS=Mus musculus OX=10090 GN=Zg16 PE=1 SV=1	1	4	4	4	2	2	1	2	2	1	1	3	3	2	2	2	1	1	3	2	1	2	2	1	1	2	3	2	2	2	3	3	1	1	2	0	1	3	0	1	2
366	Q8K0C9	Q8K0C9	3	3	3	GDP-mannose 4,6 dehydratase	Gmds	sp|Q8K0C9|GMDS_MOUSE GDP-mannose 4,6 dehydratase OS=Mus musculus OX=10090 GN=Gmds PE=1 SV=1	1	3	3	3	2	2	2	1	3	2	2	1	2	0	0	2	2	2	2	1	1	1	1	0	2	3	2	1	1	2	0	1	2	1	3	3	1	3	1	2	1
367	Q8K2B3	Q8K2B3	2	2	2	Succinate dehydrogenase [ubiquinone] flavoprotein subunit, mitochondrial	Sdha	sp|Q8K2B3|SDHA_MOUSE Succinate dehydrogenase [ubiquinone] flavoprotein subunit, mitochondrial OS=Mus musculus OX=10090 GN=Sdha PE=1 SV=1	1	2	2	2	0	1	1	0	2	1	0	0	0	1	2	0	1	0	1	1	0	0	0	2	0	0	0	1	0	0	0	0	2	2	1	2	0	0	1	0	1
368	Q8K3J1	Q8K3J1	3	3	3	NADH dehydrogenase [ubiquinone] iron-sulfur protein 8, mitochondrial	Ndufs8	sp|Q8K3J1|NDUS8_MOUSE NADH dehydrogenase [ubiquinone] iron-sulfur protein 8, mitochondrial OS=Mus musculus OX=10090 GN=Ndufs8 PE=1 SV=1	1	3	3	3	1	0	0	0	0	2	1	1	1	1	0	0	1	1	1	0	1	0	2	1	1	0	1	0	1	1	1	0	1	1	2	0	0	0	1	1	0
369	Q8K419;O54891	Q8K419	14;2	14;2	14;2	Galectin-4	Lgals4	sp|Q8K419|LEG4_MOUSE Galectin-4 OS=Mus musculus OX=10090 GN=Lgals4 PE=1 SV=2	2	14	14	14	7	7	5	6	6	9	7	9	6	11	10	12	7	8	8	6	9	7	7	8	7	8	9	7	7	8	7	8	8	6	6	6	5	8	6	9	6
370	Q8QZT1	Q8QZT1	4	4	4	Acetyl-CoA acetyltransferase, mitochondrial	Acat1	sp|Q8QZT1|THIL_MOUSE Acetyl-CoA acetyltransferase, mitochondrial OS=Mus musculus OX=10090 GN=Acat1 PE=1 SV=1	1	4	4	4	1	1	0	0	1	1	1	1	0	0	0	0	0	1	0	0	0	0	0	0	2	0	1	1	0	0	0	1	0	1	0	0	0	0	0	1	0
371	Q8R059	Q8R059	4	4	4	UDP-glucose 4-epimerase	Gale	sp|Q8R059|GALE_MOUSE UDP-glucose 4-epimerase OS=Mus musculus OX=10090 GN=Gale PE=1 SV=1	1	4	4	4	1	0	0	0	0	1	2	1	1	0	1	1	1	1	0	1	1	0	0	0	1	1	1	0	1	1	1	0	0	0	0	1	1	1	0	1	0
372	Q8R0W0	Q8R0W0	2	2	2	Epiplakin	Eppk1	sp|Q8R0W0|EPIPL_MOUSE Epiplakin OS=Mus musculus OX=10090 GN=Eppk1 PE=1 SV=2	1	2	2	2	0	0	1	1	0	0	0	0	0	0	1	1	0	0	0	1	0	0	0	0	0	0	2	0	0	1	0	0	2	2	1	1	0	1	1	0	1
373	Q8R0Y6	Q8R0Y6	2	2	2	Cytosolic 10-formyltetrahydrofolate dehydrogenase	Aldh1l1	sp|Q8R0Y6|AL1L1_MOUSE Cytosolic 10-formyltetrahydrofolate dehydrogenase OS=Mus musculus OX=10090 GN=Aldh1l1 PE=1 SV=1	1	2	2	2	0	0	1	0	0	0	0	0	2	0	0	0	0	0	0	0	0	0	0	0	1	1	0	0	0	0	0	0	0	0	0	0	0	0	0	0	0
374	Q8R1M8	Q8R1M8	3	3	3	Mucosal pentraxin	Mptx1	sp|Q8R1M8|MPTX_MOUSE Mucosal pentraxin OS=Mus musculus OX=10090 GN=Mptx1 PE=2 SV=1	1	3	3	3	2	1	1	1	0	1	0	2	0	0	2	2	2	1	3	2	0	1	1	3	0	0	1	0	0	0	0	0	0	0	0	0	0	0	1	1	2
375	Q8R1S0	Q8R1S0	1	1	1	Ubiquinone biosynthesis monooxygenase COQ6, mitochondrial	Coq6	sp|Q8R1S0|COQ6_MOUSE Ubiquinone biosynthesis monooxygenase COQ6, mitochondrial OS=Mus musculus OX=10090 GN=Coq6 PE=1 SV=3	1	1	1	1	0	0	1	0	0	0	0	0	0	1	0	0	0	0	0	1	0	0	0	0	0	0	0	0	1	1	0	1	0	0	0	1	0	0	0	0	0
376	Q8VIC7;Q8R2E6	Q8VIC7;Q8R2E6	1;1	1;1	1;1	Vomeronasal type-1 receptor 45;Vomeronasal type-1 receptor A11	Vmn1r45;V1ra11	sp|Q8VIC7|V1R45_MOUSE Vomeronasal type-1 receptor 45 OS=Mus musculus OX=10090 GN=Vmn1r45 PE=2 SV=1;sp|Q8R2E6|V1A11_MOUSE Vomeronasal type-1 receptor A11 OS=Mus musculus OX=10090 GN=V1ra11 PE=3 SV=1	2	1	1	1	0	0	0	0	0	0	0	0	0	0	0	0	0	0	0	0	1	0	0	0	0	0	0	0	0	0	0	0	0	0	0	0	1	0	0	0	0
377	Q8VC28	Q8VC28	3	3	3	Aldo-keto reductase family 1 member C13	Akr1c13	sp|Q8VC28|AK1CD_MOUSE Aldo-keto reductase family 1 member C13 OS=Mus musculus OX=10090 GN=Akr1c13 PE=1 SV=2	1	3	3	3	0	1	0	0	0	0	0	0	0	0	1	0	0	0	0	1	0	1	0	0	0	0	0	0	0	0	0	0	0	0	0	0	0	0	0	0	0
378	Q8VCW8	Q8VCW8	6	6	6	Acyl-CoA synthetase family member 2, mitochondrial	Acsf2	sp|Q8VCW8|ACSF2_MOUSE Medium-chain acyl-CoA ligase ACSF2, mitochondrial OS=Mus musculus OX=10090 GN=Acsf2 PE=1 SV=1	1	6	6	6	2	1	0	1	3	0	1	1	1	1	3	1	3	0	1	0	1	2	0	2	1	0	1	1	1	0	1	2	2	1	0	1	2	0	6	1	3
379	Q8VDD5	Q8VDD5	21	18	16	Myosin-9	Myh9	sp|Q8VDD5|MYH9_MOUSE Myosin-9 OS=Mus musculus OX=10090 GN=Myh9 PE=1 SV=4	1	21	18	16	3	2	1	1	1	2	1	1	1	1	6	9	4	5	1	2	4	2	5	3	3	8	7	2	5	8	3	5	6	7	1	4	3	0	3	0	2
380	Q8VDN2;Q6PIC6;Q6PIE5;Q9WV27;Q64436	Q8VDN2	13;4;4;1;1	13;4;4;1;1	13;4;4;1;1	Sodium/potassium-transporting ATPase subunit alpha-1	Atp1a1	sp|Q8VDN2|AT1A1_MOUSE Sodium/potassium-transporting ATPase subunit alpha-1 OS=Mus musculus OX=10090 GN=Atp1a1 PE=1 SV=1	5	13	13	13	1	3	1	3	2	1	1	2	3	3	5	5	1	6	7	6	6	4	5	6	2	4	1	1	5	3	7	5	6	4	1	1	0	1	1	1	0
381	Q8VDW0;Q9Z1N5	Q8VDW0;Q9Z1N5	2;2	2;2	2;2	ATP-dependent RNA helicase DDX39A;Spliceosome RNA helicase Ddx39b	Ddx39a;Ddx39b	sp|Q8VDW0|DX39A_MOUSE ATP-dependent RNA helicase DDX39A OS=Mus musculus OX=10090 GN=Ddx39a PE=1 SV=1;sp|Q9Z1N5|DX39B_MOUSE Spliceosome RNA helicase Ddx39b OS=Mus musculus OX=10090 GN=Ddx39b PE=1 SV=1	2	2	2	2	0	1	0	1	1	0	0	0	0	0	1	0	0	1	0	0	1	0	0	1	1	0	1	0	0	0	1	0	1	1	0	0	1	1	1	0	0
382	Q8VEK3	Q8VEK3	4	4	4	Heterogeneous nuclear ribonucleoprotein U	Hnrnpu	sp|Q8VEK3|HNRPU_MOUSE Heterogeneous nuclear ribonucleoprotein U OS=Mus musculus OX=10090 GN=Hnrnpu PE=1 SV=1	1	4	4	4	0	0	0	0	1	0	0	0	0	1	0	1	1	3	1	1	1	1	0	2	0	0	1	0	0	0	1	0	1	2	0	1	1	0	1	0	0
383	Q8VEM8	Q8VEM8	3	3	3	Phosphate carrier protein, mitochondrial	Slc25a3	sp|Q8VEM8|MPCP_MOUSE Phosphate carrier protein, mitochondrial OS=Mus musculus OX=10090 GN=Slc25a3 PE=1 SV=1	1	3	3	3	0	0	0	0	0	0	0	1	0	0	0	1	0	1	0	1	1	1	1	0	0	2	1	0	0	1	0	0	2	0	0	0	0	0	0	0	1
384	Q8VII3	Q8VII3	1	1	1	Cystatin-14	Cst14	sp|Q8VII3|CST14_MOUSE Cystatin-14 OS=Mus musculus OX=10090 GN=Cst14 PE=1 SV=1	1	1	1	1	0	1	0	0	0	0	1	0	0	0	1	0	0	0	0	0	0	0	0	0	0	0	0	0	0	0	0	0	0	0	0	0	1	0	0	0	0
385	Q91V92	Q91V92	5	5	5	ATP-citrate synthase	Acly	sp|Q91V92|ACLY_MOUSE ATP-citrate synthase OS=Mus musculus OX=10090 GN=Acly PE=1 SV=1	1	5	5	5	0	0	1	0	0	1	1	0	0	0	2	0	1	0	0	0	0	1	0	1	0	0	0	0	0	1	0	1	0	0	0	0	0	0	0	0	0
386	Q91VD9	Q91VD9	3	3	3	NADH-ubiquinone oxidoreductase 75 kDa subunit, mitochondrial	Ndufs1	sp|Q91VD9|NDUS1_MOUSE NADH-ubiquinone oxidoreductase 75 kDa subunit, mitochondrial OS=Mus musculus OX=10090 GN=Ndufs1 PE=1 SV=2	1	3	3	3	1	1	0	0	1	0	0	2	0	1	2	0	0	1	0	0	0	2	1	2	0	0	1	0	1	0	1	0	0	1	0	0	0	0	2	0	0
387	Q91VI7	Q91VI7	1	1	1	Ribonuclease inhibitor	Rnh1	sp|Q91VI7|RINI_MOUSE Ribonuclease inhibitor OS=Mus musculus OX=10090 GN=Rnh1 PE=1 SV=1	1	1	1	1	0	0	0	0	0	0	0	0	0	0	0	0	0	0	0	0	1	0	0	0	0	0	0	0	0	0	0	0	0	0	0	0	0	0	0	0	0
388	Q91VR2	Q91VR2	5	5	5	ATP synthase subunit gamma, mitochondrial	Atp5c1	sp|Q91VR2|ATPG_MOUSE ATP synthase subunit gamma, mitochondrial OS=Mus musculus OX=10090 GN=Atp5f1c PE=1 SV=1	1	5	5	5	2	3	2	3	1	2	3	2	2	2	3	3	3	2	1	1	2	3	2	3	2	2	2	3	4	4	3	1	2	3	2	3	1	3	2	2	3
389	Q91W90	Q91W90	6	6	6	Thioredoxin domain-containing protein 5	Txndc5	sp|Q91W90|TXND5_MOUSE Thioredoxin domain-containing protein 5 OS=Mus musculus OX=10090 GN=Txndc5 PE=1 SV=2	1	6	6	6	4	5	3	2	4	4	2	2	3	3	2	4	4	4	1	3	4	3	4	2	3	2	4	3	3	3	2	3	3	2	3	3	5	4	4	4	2
390	Q91WD5	Q91WD5	3	3	3	NADH dehydrogenase [ubiquinone] iron-sulfur protein 2, mitochondrial	Ndufs2	sp|Q91WD5|NDUS2_MOUSE NADH dehydrogenase [ubiquinone] iron-sulfur protein 2, mitochondrial OS=Mus musculus OX=10090 GN=Ndufs2 PE=1 SV=1	1	3	3	3	2	0	0	1	0	1	0	0	1	0	0	1	2	0	0	1	0	2	1	0	0	1	0	0	0	1	0	1	0	1	1	1	2	0	1	1	0
391	Q91WG8	Q91WG8	2	2	2	Bifunctional UDP-N-acetylglucosamine 2-epimerase/N-acetylmannosamine kinase;UDP-N-acetylglucosamine 2-epimerase (hydrolyzing);N-acetylmannosamine kinase	Gne	sp|Q91WG8|GLCNE_MOUSE Bifunctional UDP-N-acetylglucosamine 2-epimerase/N-acetylmannosamine kinase OS=Mus musculus OX=10090 GN=Gne PE=1 SV=1	1	2	2	2	0	0	0	0	0	0	2	0	0	0	0	0	0	0	0	0	0	0	0	1	0	0	1	0	0	0	0	1	0	0	0	0	0	0	0	0	0
392	Q91X72	Q91X72	2	2	2	Hemopexin	Hpx	sp|Q91X72|HEMO_MOUSE Hemopexin OS=Mus musculus OX=10090 GN=Hpx PE=1 SV=2	1	2	2	2	0	0	0	0	0	0	0	0	0	0	0	0	0	0	0	0	0	0	0	0	0	0	0	0	0	0	0	0	0	0	0	1	0	0	0	0	0
393	Q91X79	Q91X79	4	4	4	Chymotrypsin-like elastase family member 1	Cela1	sp|Q91X79|CELA1_MOUSE Chymotrypsin-like elastase family member 1 OS=Mus musculus OX=10090 GN=Cela1 PE=1 SV=1	1	4	4	4	1	0	0	0	1	1	1	0	0	0	0	0	0	0	3	2	1	0	0	0	0	1	0	0	0	0	0	0	0	0	0	0	0	1	0	1	1
394	Q91XA2	Q91XA2	1	1	1	Golgi membrane protein 1	Golm1	sp|Q91XA2|GOLM1_MOUSE Golgi membrane protein 1 OS=Mus musculus OX=10090 GN=Golm1 PE=1 SV=2	1	1	1	1	0	0	0	0	0	0	0	0	0	1	0	0	0	0	1	0	0	0	1	0	0	0	0	0	0	0	0	1	0	0	1	1	1	0	0	0	0
395	Q91Y97	Q91Y97	4	3	3	Fructose-bisphosphate aldolase B	Aldob	sp|Q91Y97|ALDOB_MOUSE Fructose-bisphosphate aldolase B OS=Mus musculus OX=10090 GN=Aldob PE=1 SV=3	1	4	3	3	0	1	0	0	1	0	0	2	1	1	1	2	1	0	0	0	0	0	2	1	2	0	0	0	1	1	1	0	0	0	0	1	0	1	0	1	1
396	Q91YN5	Q91YN5	2	2	2	UDP-N-acetylhexosamine pyrophosphorylase;UDP-N-acetylgalactosamine pyrophosphorylase;UDP-N-acetylglucosamine pyrophosphorylase	Uap1	sp|Q91YN5|UAP1_MOUSE UDP-N-acetylhexosamine pyrophosphorylase OS=Mus musculus OX=10090 GN=Uap1 PE=1 SV=1	1	2	2	2	1	0	1	0	1	0	1	0	0	0	0	1	0	0	0	1	0	0	1	0	0	0	0	0	1	0	0	1	0	0	0	0	0	0	1	1	1
397	Q91YQ5	Q91YQ5	5	5	5	Dolichyl-diphosphooligosaccharide--protein glycosyltransferase subunit 1	Rpn1	sp|Q91YQ5|RPN1_MOUSE Dolichyl-diphosphooligosaccharide--protein glycosyltransferase subunit 1 OS=Mus musculus OX=10090 GN=Rpn1 PE=1 SV=1	1	5	5	5	1	0	0	0	0	0	0	0	0	2	0	1	1	0	1	0	0	1	0	0	2	0	0	0	1	1	1	1	0	1	0	0	1	0	0	0	1
398	Q91ZJ5	Q91ZJ5	2	2	2	UTP--glucose-1-phosphate uridylyltransferase	Ugp2	sp|Q91ZJ5|UGPA_MOUSE UTP--glucose-1-phosphate uridylyltransferase OS=Mus musculus OX=10090 GN=Ugp2 PE=1 SV=3	1	2	2	2	0	0	2	2	0	0	0	0	1	0	0	1	0	0	0	1	0	1	1	0	0	0	0	1	0	0	0	0	0	0	0	0	1	0	1	1	0
399	Q921F2	Q921F2	2	2	2	TAR DNA-binding protein 43	Tardbp	sp|Q921F2|TADBP_MOUSE TAR DNA-binding protein 43 OS=Mus musculus OX=10090 GN=Tardbp PE=1 SV=1	1	2	2	2	0	0	1	0	0	1	1	0	0	0	0	1	0	1	0	0	0	0	1	0	0	1	0	0	0	0	0	0	0	0	1	0	0	0	0	0	0
400	Q921I1	Q921I1	9	9	9	Serotransferrin	Tf	sp|Q921I1|TRFE_MOUSE Serotransferrin OS=Mus musculus OX=10090 GN=Tf PE=1 SV=1	1	9	9	9	1	0	0	0	0	0	0	0	0	0	1	0	0	0	0	0	1	0	1	0	0	0	0	1	0	2	0	1	1	1	0	1	0	1	0	1	2
401	Q922Q8	Q922Q8	2	2	2	Leucine-rich repeat-containing protein 59	Lrrc59	sp|Q922Q8|LRC59_MOUSE Leucine-rich repeat-containing protein 59 OS=Mus musculus OX=10090 GN=Lrrc59 PE=1 SV=1	1	2	2	2	0	2	1	1	1	0	2	1	0	1	0	1	2	1	1	0	1	0	1	1	0	1	0	1	0	1	1	0	1	1	1	0	1	1	1	2	0
402	Q922R8	Q922R8	8	8	8	Protein disulfide-isomerase A6	Pdia6	sp|Q922R8|PDIA6_MOUSE Protein disulfide-isomerase A6 OS=Mus musculus OX=10090 GN=Pdia6 PE=1 SV=3	1	8	8	8	2	3	2	3	2	3	2	4	2	2	2	4	3	3	3	3	3	1	0	3	2	1	4	1	1	3	1	3	0	5	2	3	4	4	2	4	2
403	Q93092	Q93092	6	6	6	Transaldolase	Taldo1	sp|Q93092|TALDO_MOUSE Transaldolase OS=Mus musculus OX=10090 GN=Taldo1 PE=1 SV=2	1	6	6	6	4	2	3	0	1	0	3	3	2	2	3	3	4	2	3	3	2	2	2	1	1	1	1	2	2	2	1	4	1	2	3	3	3	3	2	1	1
404	Q99020	Q99020	2	2	2	Heterogeneous nuclear ribonucleoprotein A/B	Hnrnpab	sp|Q99020|ROAA_MOUSE Heterogeneous nuclear ribonucleoprotein A/B OS=Mus musculus OX=10090 GN=Hnrnpab PE=1 SV=1	1	2	2	2	0	1	1	0	2	2	1	1	0	2	1	0	1	2	1	1	1	0	2	2	0	2	2	1	0	2	2	1	0	1	0	1	2	2	0	1	0
405	Q99J77	Q99J77	5	5	5		Nans	sp|Q99J77|SIAS_MOUSE Sialic acid synthase OS=Mus musculus OX=10090 GN=Nans PE=1 SV=1	1	5	5	5	2	2	2	2	3	2	1	1	3	3	1	2	1	1	0	0	1	4	3	2	3	3	1	1	1	1	2	2	2	2	0	1	2	0	4	0	0
406	Q99J99	Q99J99	2	2	2	3-mercaptopyruvate sulfurtransferase	Mpst	sp|Q99J99|THTM_MOUSE 3-mercaptopyruvate sulfurtransferase OS=Mus musculus OX=10090 GN=Mpst PE=1 SV=4	1	2	2	2	0	0	1	0	0	0	0	1	0	1	0	0	1	0	0	0	0	0	0	1	0	0	0	2	1	0	1	0	0	0	1	0	0	0	2	0	0
407	Q99JW5	Q99JW5	3	3	3	Epithelial cell adhesion molecule	Epcam	sp|Q99JW5|EPCAM_MOUSE Epithelial cell adhesion molecule OS=Mus musculus OX=10090 GN=Epcam PE=1 SV=1	1	3	3	3	1	1	0	2	1	1	2	2	1	0	2	1	2	1	0	0	1	0	0	2	2	1	2	1	1	1	0	2	1	1	2	1	0	1	1	0	1
408	Q99JY0	Q99JY0	6	6	6	Trifunctional enzyme subunit beta, mitochondrial;3-ketoacyl-CoA thiolase	Hadhb	sp|Q99JY0|ECHB_MOUSE Trifunctional enzyme subunit beta, mitochondrial OS=Mus musculus OX=10090 GN=Hadhb PE=1 SV=1	1	6	6	6	1	2	3	2	1	2	1	2	2	3	2	2	1	1	1	2	3	0	3	3	2	3	2	2	3	3	1	3	1	2	2	1	2	2	2	1	2
409	Q99JY9;Q641P0	Q99JY9;Q641P0	4;2	4;2	4;2	Actin-related protein 3;Actin-related protein 3B	Actr3;Actr3b	sp|Q99JY9|ARP3_MOUSE Actin-related protein 3 OS=Mus musculus OX=10090 GN=Actr3 PE=1 SV=3;sp|Q641P0|ARP3B_MOUSE Actin-related protein 3B OS=Mus musculus OX=10090 GN=Actr3b PE=1 SV=1	2	4	4	4	0	0	1	1	0	0	1	0	1	2	1	0	1	1	1	2	1	1	2	1	1	1	1	0	1	1	1	1	1	1	2	2	0	0	0	1	1
410	Q99K01	Q99K01	10	10	10	Pyridoxal-dependent decarboxylase domain-containing protein 1	Pdxdc1	sp|Q99K01|PDXD1_MOUSE Pyridoxal-dependent decarboxylase domain-containing protein 1 OS=Mus musculus OX=10090 GN=Pdxdc1 PE=1 SV=2	1	10	10	10	2	1	3	2	4	1	2	3	4	3	2	2	3	2	3	2	2	2	1	5	4	1	2	4	3	3	4	2	3	3	4	2	2	2	2	1	3
411	Q99KI0	Q99KI0	16	16	16	Aconitate hydratase, mitochondrial	Aco2	sp|Q99KI0|ACON_MOUSE Aconitate hydratase, mitochondrial OS=Mus musculus OX=10090 GN=Aco2 PE=1 SV=1	1	16	16	16	6	6	8	7	8	7	4	5	7	6	4	6	8	5	3	6	9	7	6	4	7	6	7	3	8	4	9	6	6	8	6	5	5	3	7	4	3
412	Q99KK2	Q99KK2	2	2	2	N-acylneuraminate cytidylyltransferase	Cmas	sp|Q99KK2|NEUA_MOUSE N-acylneuraminate cytidylyltransferase OS=Mus musculus OX=10090 GN=Cmas PE=1 SV=2	1	2	2	2	0	1	0	0	1	0	1	0	0	1	0	0	0	0	0	1	0	1	1	0	0	0	1	0	0	0	1	0	0	0	0	0	0	0	0	0	0
413	Q99KP3	Q99KP3	2	2	2	Lambda-crystallin homolog	Cryl1	sp|Q99KP3|CRYL1_MOUSE Lambda-crystallin homolog OS=Mus musculus OX=10090 GN=Cryl1 PE=1 SV=3	1	2	2	2	1	1	1	0	1	0	1	2	0	0	1	1	0	1	0	0	1	0	0	0	0	0	1	0	0	0	1	0	0	0	0	0	0	0	1	0	0
414	Q99KV1	Q99KV1	2	2	2	DnaJ homolog subfamily B member 11	Dnajb11	sp|Q99KV1|DJB11_MOUSE DnaJ homolog subfamily B member 11 OS=Mus musculus OX=10090 GN=Dnajb11 PE=1 SV=1	1	2	2	2	0	0	1	0	0	0	0	0	0	0	0	0	0	0	0	0	0	0	0	0	0	0	0	0	0	0	0	0	0	0	0	0	0	0	1	0	0
415	Q99L45	Q99L45	1	1	1	Eukaryotic translation initiation factor 2 subunit 2	Eif2s2	sp|Q99L45|IF2B_MOUSE Eukaryotic translation initiation factor 2 subunit 2 OS=Mus musculus OX=10090 GN=Eif2s2 PE=1 SV=1	1	1	1	1	0	0	0	1	1	0	0	0	0	0	0	0	0	0	0	1	0	0	0	1	0	0	0	1	0	0	0	1	0	1	0	0	0	0	0	0	0
416	Q99L47	Q99L47	2	2	2	Hsc70-interacting protein	St13	sp|Q99L47|F10A1_MOUSE Hsc70-interacting protein OS=Mus musculus OX=10090 GN=St13 PE=1 SV=1	1	2	2	2	1	1	0	1	1	0	1	0	0	0	1	1	1	0	0	1	0	0	0	0	0	1	1	1	0	0	0	0	0	1	0	0	0	0	0	0	0
417	Q99LC3	Q99LC3	4	4	4	NADH dehydrogenase [ubiquinone] 1 alpha subcomplex subunit 10, mitochondrial	Ndufa10	sp|Q99LC3|NDUAA_MOUSE NADH dehydrogenase [ubiquinone] 1 alpha subcomplex subunit 10, mitochondrial OS=Mus musculus OX=10090 GN=Ndufa10 PE=1 SV=1	1	4	4	4	0	1	1	0	0	0	0	0	1	0	0	0	0	0	0	0	0	1	1	1	0	0	0	1	0	1	0	0	1	0	1	1	0	1	1	1	1
418	Q99LC5	Q99LC5	3	3	3	Electron transfer flavoprotein subunit alpha, mitochondrial	Etfa	sp|Q99LC5|ETFA_MOUSE Electron transfer flavoprotein subunit alpha, mitochondrial OS=Mus musculus OX=10090 GN=Etfa PE=1 SV=2	1	3	3	3	0	1	1	2	2	2	1	1	0	1	1	1	1	1	1	1	0	0	1	1	0	0	1	2	1	2	1	2	1	1	1	2	1	0	2	1	1
419	Q99PL5	Q99PL5	3	3	3	Ribosome-binding protein 1	Rrbp1	sp|Q99PL5|RRBP1_MOUSE Ribosome-binding protein 1 OS=Mus musculus OX=10090 GN=Rrbp1 PE=1 SV=2	1	3	3	3	0	1	0	0	0	0	0	0	0	0	0	1	0	0	1	0	0	1	0	0	0	0	0	0	0	2	0	1	1	0	0	0	1	1	0	0	0
420	Q99PT1	Q99PT1	3	3	3	Rho GDP-dissociation inhibitor 1	Arhgdia	sp|Q99PT1|GDIR1_MOUSE Rho GDP-dissociation inhibitor 1 OS=Mus musculus OX=10090 GN=Arhgdia PE=1 SV=3	1	3	3	3	0	2	2	1	2	1	1	0	2	0	2	1	2	0	0	1	1	0	0	1	0	2	0	2	0	0	2	0	0	2	1	1	2	0	1	1	0
421	Q9CPQ1	Q9CPQ1	4	4	4	Cytochrome c oxidase subunit 6C	Cox6c	sp|Q9CPQ1|COX6C_MOUSE Cytochrome c oxidase subunit 6C OS=Mus musculus OX=10090 GN=Cox6c PE=1 SV=3	1	4	4	4	1	2	1	1	1	2	2	0	1	1	0	0	1	2	0	1	1	1	0	1	0	1	1	2	0	1	0	1	2	1	0	0	0	1	1	1	2
422	Q9CPR4	Q9CPR4	1	1	1	60S ribosomal protein L17	Rpl17	sp|Q9CPR4|RL17_MOUSE 60S ribosomal protein L17 OS=Mus musculus OX=10090 GN=Rpl17 PE=1 SV=3	1	1	1	1	0	0	0	0	0	1	1	1	0	0	0	1	0	0	0	1	0	0	1	1	1	1	0	0	0	0	0	1	1	0	1	1	0	1	1	0	0
423	Q9CPU0	Q9CPU0	2	2	2	Lactoylglutathione lyase	Glo1	sp|Q9CPU0|LGUL_MOUSE Lactoylglutathione lyase OS=Mus musculus OX=10090 GN=Glo1 PE=1 SV=3	1	2	2	2	2	1	1	1	0	1	2	0	0	1	1	2	0	2	1	0	0	0	0	2	1	0	0	0	2	0	0	1	1	0	0	0	1	0	0	0	0
424	Q9CQ19	Q9CQ19	7	2	2	Myosin regulatory light polypeptide 9	Myl9	sp|Q9CQ19|MYL9_MOUSE Myosin regulatory light polypeptide 9 OS=Mus musculus OX=10090 GN=Myl9 PE=1 SV=3	1	7	2	2	0	2	4	2	2	4	3	1	3	2	1	2	2	2	1	2	1	4	3	2	3	4	6	3	4	2	3	2	2	3	4	3	5	3	4	2	3
425	Q9CQ52	Q9CQ52	3	3	3	Chymotrypsin-like elastase family member 3B	Cela3b	sp|Q9CQ52|CEL3B_MOUSE Chymotrypsin-like elastase family member 3B OS=Mus musculus OX=10090 GN=Cela3b PE=1 SV=1	1	3	3	3	0	1	0	0	0	1	0	0	0	0	0	0	0	0	0	1	0	0	0	1	0	0	0	1	0	0	0	0	0	0	0	0	0	1	0	1	1
426	Q9CQ62	Q9CQ62	2	2	2	2,4-dienoyl-CoA reductase, mitochondrial	Decr1	sp|Q9CQ62|DECR_MOUSE 2,4-dienoyl-CoA reductase, mitochondrial OS=Mus musculus OX=10090 GN=Decr1 PE=1 SV=1	1	2	2	2	0	0	0	0	0	0	1	0	0	0	0	0	0	0	0	0	0	0	1	0	0	0	0	1	0	0	1	0	0	1	0	1	0	0	0	0	0
427	Q9CQ92	Q9CQ92	1	1	1	Mitochondrial fission 1 protein	Fis1	sp|Q9CQ92|FIS1_MOUSE Mitochondrial fission 1 protein OS=Mus musculus OX=10090 GN=Fis1 PE=1 SV=1	1	1	1	1	0	0	0	0	0	0	0	1	0	0	0	0	0	0	0	0	0	0	0	0	1	0	0	0	0	1	0	1	0	1	0	0	0	0	0	0	0
428	Q9CQA3	Q9CQA3	5	5	5	Succinate dehydrogenase [ubiquinone] iron-sulfur subunit, mitochondrial	Sdhb	sp|Q9CQA3|SDHB_MOUSE Succinate dehydrogenase [ubiquinone] iron-sulfur subunit, mitochondrial OS=Mus musculus OX=10090 GN=Sdhb PE=1 SV=1	1	5	5	5	4	2	3	2	1	1	2	1	1	1	1	0	2	1	0	4	1	4	3	2	1	1	2	3	1	1	0	2	2	2	1	1	2	1	1	2	1
429	Q9CQC2	Q9CQC2	1	1	1	Colipase	Clps	sp|Q9CQC2|COL_MOUSE Colipase OS=Mus musculus OX=10090 GN=Clps PE=1 SV=1	1	1	1	1	0	0	0	1	0	0	0	0	0	0	0	0	0	0	1	1	1	0	0	0	0	0	0	0	0	0	0	0	0	0	0	0	0	1	0	0	1
430	Q9CQI6	Q9CQI6	2	2	2	Coactosin-like protein	Cotl1	sp|Q9CQI6|COTL1_MOUSE Coactosin-like protein OS=Mus musculus OX=10090 GN=Cotl1 PE=1 SV=3	1	2	2	2	0	1	0	1	0	0	0	0	0	1	0	0	0	0	0	0	0	1	0	0	0	0	0	0	0	0	0	0	0	0	1	1	0	0	0	1	0
431	Q9CQQ7	Q9CQQ7	4	4	4	ATP synthase F(0) complex subunit B1, mitochondrial	Atp5f1	sp|Q9CQQ7|AT5F1_MOUSE ATP synthase F(0) complex subunit B1, mitochondrial OS=Mus musculus OX=10090 GN=Atp5pb PE=1 SV=1	1	4	4	4	0	0	0	2	1	0	1	0	0	1	1	1	2	0	2	0	0	1	1	0	1	1	1	1	2	1	1	0	0	1	1	2	0	0	1	0	1
432	Q9CQR2	Q9CQR2	1	1	1	40S ribosomal protein S21	Rps21	sp|Q9CQR2|RS21_MOUSE 40S ribosomal protein S21 OS=Mus musculus OX=10090 GN=Rps21 PE=1 SV=1	1	1	1	1	1	0	1	1	0	0	1	0	1	1	0	1	1	0	1	1	0	1	1	1	0	0	0	1	0	0	1	1	0	0	1	1	1	1	1	1	0
433	Q9CQV8	Q9CQV8	5	3	3	14-3-3 protein beta/alpha;14-3-3 protein beta/alpha, N-terminally processed	Ywhab	sp|Q9CQV8|1433B_MOUSE 14-3-3 protein beta/alpha OS=Mus musculus OX=10090 GN=Ywhab PE=1 SV=3	1	5	3	3	2	2	2	1	3	1	2	4	2	1	4	2	3	2	4	3	3	3	2	2	3	2	3	2	3	3	3	3	3	2	3	4	2	3	2	2	4
434	Q9CQX2	Q9CQX2	1	1	1	Cytochrome b5 type B	Cyb5b	sp|Q9CQX2|CYB5B_MOUSE Cytochrome b5 type B OS=Mus musculus OX=10090 GN=Cyb5b PE=1 SV=1	1	1	1	1	1	1	1	1	0	1	0	1	1	1	0	1	1	0	1	0	1	1	0	0	1	0	1	0	0	0	0	0	0	0	1	1	1	1	0	0	1
435	Q9CR35	Q9CR35	5	5	5	Chymotrypsinogen B;Chymotrypsin B chain A;Chymotrypsin B chain B;Chymotrypsin B chain C	Ctrb1	sp|Q9CR35|CTRB1_MOUSE Chymotrypsinogen B OS=Mus musculus OX=10090 GN=Ctrb1 PE=1 SV=1	1	5	5	5	0	0	0	0	0	2	1	0	0	0	0	1	1	0	4	2	3	0	0	0	0	0	0	1	0	0	0	0	0	0	0	0	0	3	0	2	1
436	Q9CR57	Q9CR57	3	3	3	60S ribosomal protein L14	Rpl14	sp|Q9CR57|RL14_MOUSE 60S ribosomal protein L14 OS=Mus musculus OX=10090 GN=Rpl14 PE=1 SV=3	1	3	3	3	1	2	1	2	0	1	1	1	1	1	1	2	1	1	1	2	1	1	1	1	1	1	1	1	0	0	1	1	1	1	1	0	1	1	1	1	1
437	Q9CR68	Q9CR68	2	2	2	Cytochrome b-c1 complex subunit Rieske, mitochondrial;Cytochrome b-c1 complex subunit 11	Uqcrfs1	sp|Q9CR68|UCRI_MOUSE Cytochrome b-c1 complex subunit Rieske, mitochondrial OS=Mus musculus OX=10090 GN=Uqcrfs1 PE=1 SV=1	1	2	2	2	0	1	0	2	1	0	1	2	0	0	1	0	0	0	0	1	1	1	1	1	0	0	1	0	0	0	1	0	0	0	1	0	1	1	0	1	1
438	Q9CRB6	Q9CRB6	1	1	1	Tubulin polymerization-promoting protein family member 3	Tppp3	sp|Q9CRB6|TPPP3_MOUSE Tubulin polymerization-promoting protein family member 3 OS=Mus musculus OX=10090 GN=Tppp3 PE=1 SV=1	1	1	1	1	1	0	0	1	0	1	0	0	0	0	0	0	0	1	0	0	0	0	1	0	0	0	0	0	0	1	0	0	0	0	0	0	0	0	1	0	0
439	Q9CXI5	Q9CXI5	1	1	1	Mesencephalic astrocyte-derived neurotrophic factor	Manf	sp|Q9CXI5|MANF_MOUSE Mesencephalic astrocyte-derived neurotrophic factor OS=Mus musculus OX=10090 GN=Manf PE=1 SV=1	1	1	1	1	0	0	0	0	0	0	0	0	0	0	0	0	0	0	0	0	0	0	1	0	0	0	0	0	0	0	0	0	0	0	0	0	0	0	0	0	0
440	Q9CXW4	Q9CXW4	2	2	2	60S ribosomal protein L11	Rpl11	sp|Q9CXW4|RL11_MOUSE 60S ribosomal protein L11 OS=Mus musculus OX=10090 GN=Rpl11 PE=1 SV=4	1	2	2	2	2	2	2	1	1	1	1	1	0	0	2	0	0	1	0	1	2	1	1	0	1	1	1	1	2	1	1	1	2	1	0	1	0	1	1	1	1
441	Q9CY50	Q9CY50	2	2	2	Translocon-associated protein subunit alpha	Ssr1	sp|Q9CY50|SSRA_MOUSE Translocon-associated protein subunit alpha OS=Mus musculus OX=10090 GN=Ssr1 PE=1 SV=1	1	2	2	2	1	1	0	0	1	1	0	0	0	0	0	0	0	1	0	0	0	0	1	0	0	0	0	1	0	0	0	0	0	1	0	1	0	0	1	1	0
442	Q9CY58	Q9CY58	1	1	1	Plasminogen activator inhibitor 1 RNA-binding protein	Serbp1	sp|Q9CY58|PAIRB_MOUSE Plasminogen activator inhibitor 1 RNA-binding protein OS=Mus musculus OX=10090 GN=Serbp1 PE=1 SV=2	1	1	1	1	1	1	1	1	1	0	0	0	0	0	0	0	0	0	1	0	0	0	0	0	0	1	0	0	1	0	0	0	0	0	1	0	0	1	1	0	0
443	Q9CZ13	Q9CZ13	5	5	5	Cytochrome b-c1 complex subunit 1, mitochondrial	Uqcrc1	sp|Q9CZ13|QCR1_MOUSE Cytochrome b-c1 complex subunit 1, mitochondrial OS=Mus musculus OX=10090 GN=Uqcrc1 PE=1 SV=2	1	5	5	5	1	2	3	1	1	1	3	2	1	2	2	2	2	3	3	1	3	3	2	2	1	2	3	2	2	2	1	1	2	2	2	2	2	2	3	2	2
444	Q9CZD3	Q9CZD3	2	2	2	Glycine--tRNA ligase	Gars	sp|Q9CZD3|GARS_MOUSE Glycine--tRNA ligase OS=Mus musculus OX=10090 GN=Gars1 PE=1 SV=1	1	2	2	2	0	0	0	0	0	0	0	0	0	0	0	0	0	0	1	0	0	0	0	0	0	0	0	0	0	0	0	0	0	0	0	1	0	1	0	0	0
445	Q9CZS1;Q62148	Q9CZS1	14;2	13;1	13;1	Aldehyde dehydrogenase X, mitochondrial	Aldh1b1	sp|Q9CZS1|AL1B1_MOUSE Aldehyde dehydrogenase X, mitochondrial OS=Mus musculus OX=10090 GN=Aldh1b1 PE=1 SV=1	2	14	13	13	6	7	8	6	6	6	6	4	3	5	5	6	5	6	5	5	3	5	8	6	6	7	5	7	4	6	6	8	7	7	9	6	6	5	9	4	8
446	Q9CZU6	Q9CZU6	8	8	8	Citrate synthase, mitochondrial	Cs	sp|Q9CZU6|CISY_MOUSE Citrate synthase, mitochondrial OS=Mus musculus OX=10090 GN=Cs PE=1 SV=1	1	8	8	8	3	4	1	4	6	4	4	6	3	4	3	3	2	3	2	3	4	5	2	4	4	3	1	3	3	2	4	3	4	3	3	2	4	4	3	2	2
447	Q9CZX8	Q9CZX8	3	3	3	40S ribosomal protein S19	Rps19	sp|Q9CZX8|RS19_MOUSE 40S ribosomal protein S19 OS=Mus musculus OX=10090 GN=Rps19 PE=1 SV=3	1	3	3	3	1	2	2	1	1	1	1	0	1	1	2	1	0	0	2	1	2	2	1	3	1	1	2	2	0	1	0	1	1	1	2	1	1	2	2	1	3
448	Q9D051	Q9D051	4	4	4	Pyruvate dehydrogenase E1 component subunit beta, mitochondrial	Pdhb	sp|Q9D051|ODPB_MOUSE Pyruvate dehydrogenase E1 component subunit beta, mitochondrial OS=Mus musculus OX=10090 GN=Pdhb PE=1 SV=1	1	4	4	4	0	0	0	0	1	0	0	0	1	1	0	0	0	0	1	0	1	2	1	0	1	2	0	0	0	0	0	0	1	0	1	0	1	0	1	1	0
449	Q9D0E1	Q9D0E1	2	2	2	Heterogeneous nuclear ribonucleoprotein M	Hnrnpm	sp|Q9D0E1|HNRPM_MOUSE Heterogeneous nuclear ribonucleoprotein M OS=Mus musculus OX=10090 GN=Hnrnpm PE=1 SV=3	1	2	2	2	0	1	0	0	1	0	0	0	1	2	2	0	1	1	1	0	0	2	0	1	0	0	1	0	0	1	0	0	0	0	2	2	1	1	0	0	0
450	Q9D0F9	Q9D0F9	2	2	2	Phosphoglucomutase-1	Pgm1	sp|Q9D0F9|PGM1_MOUSE Phosphoglucomutase-1 OS=Mus musculus OX=10090 GN=Pgm1 PE=1 SV=4	1	2	2	2	1	0	0	0	0	0	1	0	1	0	0	0	1	0	1	2	0	0	1	1	0	1	1	1	0	0	1	0	1	1	1	2	0	0	0	0	0
451	Q9D0I9	Q9D0I9	2	2	2	Arginine--tRNA ligase, cytoplasmic	Rars	sp|Q9D0I9|SYRC_MOUSE Arginine--tRNA ligase, cytoplasmic OS=Mus musculus OX=10090 GN=Rars1 PE=1 SV=2	1	2	2	2	0	0	0	0	1	0	0	0	0	0	0	0	0	1	1	0	1	1	1	1	1	0	0	0	0	0	1	1	0	1	0	0	1	1	1	0	0
452	Q9D0J8	Q9D0J8	1	1	1	Parathymosin	Ptms	sp|Q9D0J8|PTMS_MOUSE Parathymosin OS=Mus musculus OX=10090 GN=Ptms PE=1 SV=3	1	1	1	1	1	0	1	1	1	1	0	1	1	1	1	1	0	1	1	1	0	1	1	1	1	1	1	0	1	1	1	1	0	1	1	1	1	1	1	0	0
453	Q9D0M3	Q9D0M3	3	3	3	Cytochrome c1, heme protein, mitochondrial	Cyc1	sp|Q9D0M3|CY1_MOUSE Cytochrome c1, heme protein, mitochondrial OS=Mus musculus OX=10090 GN=Cyc1 PE=1 SV=1	1	3	3	3	3	2	1	2	1	2	2	2	2	1	0	2	1	1	2	1	2	1	1	1	0	0	2	1	1	2	1	2	0	1	1	2	1	0	1	2	1
454	Q9D0R2	Q9D0R2	2	2	2	Threonine--tRNA ligase, cytoplasmic	Tars	sp|Q9D0R2|SYTC_MOUSE Threonine--tRNA ligase 1, cytoplasmic OS=Mus musculus OX=10090 GN=Tars1 PE=1 SV=2	1	2	2	2	0	0	0	0	0	0	0	0	0	0	0	0	0	0	0	0	0	0	0	0	0	0	0	0	0	0	0	0	1	1	0	0	0	0	0	0	0
455	Q9D154;Q8VHP7	Q9D154	10;2	10;2	9;1	Leukocyte elastase inhibitor A	Serpinb1a	sp|Q9D154|ILEUA_MOUSE Leukocyte elastase inhibitor A OS=Mus musculus OX=10090 GN=Serpinb1a PE=1 SV=1	2	10	10	9	4	3	3	3	2	4	3	4	5	4	1	4	3	2	2	3	2	2	3	4	3	4	3	2	3	7	5	3	4	5	5	2	2	2	3	4	5
456	Q9D1A2	Q9D1A2	3	3	3	Cytosolic non-specific dipeptidase	Cndp2	sp|Q9D1A2|CNDP2_MOUSE Cytosolic non-specific dipeptidase OS=Mus musculus OX=10090 GN=Cndp2 PE=1 SV=1	1	3	3	3	0	0	0	1	0	0	0	0	0	0	0	0	0	0	1	0	0	0	0	0	0	0	0	0	0	0	0	0	0	0	1	1	0	0	0	1	0
457	Q9D1D4	Q9D1D4	1	1	1	Transmembrane emp24 domain-containing protein 10	Tmed10	sp|Q9D1D4|TMEDA_MOUSE Transmembrane emp24 domain-containing protein 10 OS=Mus musculus OX=10090 GN=Tmed10 PE=1 SV=1	1	1	1	1	0	0	0	0	0	0	1	0	1	0	0	0	0	1	0	0	1	0	1	0	1	1	0	0	1	0	0	0	1	1	1	0	1	1	1	1	0
458	Q9D1Q6	Q9D1Q6	1	1	1	Endoplasmic reticulum resident protein 44	Erp44	sp|Q9D1Q6|ERP44_MOUSE Endoplasmic reticulum resident protein 44 OS=Mus musculus OX=10090 GN=Erp44 PE=1 SV=1	1	1	1	1	0	0	0	0	0	0	0	0	0	0	0	0	0	0	0	0	0	0	0	1	0	0	0	0	0	0	0	0	0	0	0	0	0	0	1	0	0
459	Q9D2G2	Q9D2G2	2	2	2	Dihydrolipoyllysine-residue succinyltransferase component of 2-oxoglutarate dehydrogenase complex, mitochondrial	Dlst	sp|Q9D2G2|ODO2_MOUSE Dihydrolipoyllysine-residue succinyltransferase component of 2-oxoglutarate dehydrogenase complex, mitochondrial OS=Mus musculus OX=10090 GN=Dlst PE=1 SV=1	1	2	2	2	0	0	0	0	0	0	0	0	0	0	1	0	0	0	0	0	0	0	0	0	0	0	0	0	0	0	1	0	1	0	0	0	1	0	0	0	0
460	Q9D3D9	Q9D3D9	2	2	2	ATP synthase subunit delta, mitochondrial	Atp5d	sp|Q9D3D9|ATPD_MOUSE ATP synthase subunit delta, mitochondrial OS=Mus musculus OX=10090 GN=Atp5f1d PE=1 SV=1	1	2	2	2	1	1	1	0	1	1	0	1	1	1	0	1	1	0	1	1	1	0	1	1	1	0	1	1	2	1	2	1	1	0	0	0	1	1	0	1	1
461	Q9D6F9	Q9D6F9	11	1	0	Tubulin beta-4A chain	Tubb4a	sp|Q9D6F9|TBB4A_MOUSE Tubulin beta-4A chain OS=Mus musculus OX=10090 GN=Tubb4a PE=1 SV=3	1	11	1	0	10	5	8	8	8	6	9	7	6	8	9	8	8	10	8	9	9	6	8	9	9	8	8	8	10	8	8	7	7	8	9	8	8	10	9	9	8
462	Q9D6J6	Q9D6J6	2	2	2	NADH dehydrogenase [ubiquinone] flavoprotein 2, mitochondrial	Ndufv2	sp|Q9D6J6|NDUV2_MOUSE NADH dehydrogenase [ubiquinone] flavoprotein 2, mitochondrial OS=Mus musculus OX=10090 GN=Ndufv2 PE=1 SV=2	1	2	2	2	0	2	2	0	1	2	0	0	1	1	0	0	1	1	0	1	0	0	1	2	0	0	1	2	2	0	0	2	1	2	2	2	0	0	0	0	2
463	Q9D6R2	Q9D6R2	4	4	4	Isocitrate dehydrogenase [NAD] subunit alpha, mitochondrial	Idh3a	sp|Q9D6R2|IDH3A_MOUSE Isocitrate dehydrogenase [NAD] subunit alpha, mitochondrial OS=Mus musculus OX=10090 GN=Idh3a PE=1 SV=1	1	4	4	4	2	2	0	2	2	2	2	2	1	0	1	1	1	2	1	0	2	1	1	2	2	2	0	1	1	0	0	2	1	1	0	1	0	1	0	0	0
464	Q9D7Z6	Q9D7Z6	24	24	24	Calcium-activated chloride channel regulator 1	Clca1	sp|Q9D7Z6|CLCA1_MOUSE Calcium-activated chloride channel regulator 1 OS=Mus musculus OX=10090 GN=Clca1 PE=1 SV=2	1	24	24	24	16	18	17	15	6	7	8	11	10	9	21	20	13	21	21	17	16	13	12	10	6	5	3	4	4	3	2	7	3	8	3	3	5	18	4	16	18
465	Q9D816	Q9D816	4	4	4	Cytochrome P450 2C55	Cyp2c55	sp|Q9D816|CP255_MOUSE Cytochrome P450 2C55 OS=Mus musculus OX=10090 GN=Cyp2c55 PE=1 SV=1	1	4	4	4	3	1	0	0	2	0	0	3	0	2	0	0	2	1	0	0	0	0	2	0	0	0	0	1	1	0	1	0	2	0	0	1	2	1	1	1	0
466	Q9D819	Q9D819	6	6	6	Inorganic pyrophosphatase	Ppa1	sp|Q9D819|IPYR_MOUSE Inorganic pyrophosphatase OS=Mus musculus OX=10090 GN=Ppa1 PE=1 SV=1	1	6	6	6	4	3	3	4	3	3	2	3	4	3	3	1	1	4	2	3	1	6	3	3	1	3	4	1	2	4	0	2	2	3	4	3	1	1	1	1	1
467	Q9D855	Q9D855	3	3	3	Cytochrome b-c1 complex subunit 7	Uqcrb	sp|Q9D855|QCR7_MOUSE Cytochrome b-c1 complex subunit 7 OS=Mus musculus OX=10090 GN=Uqcrb PE=1 SV=3	1	3	3	3	2	1	0	0	1	0	0	0	0	0	0	2	1	0	0	0	0	0	2	0	0	1	0	1	0	1	0	0	1	0	1	1	0	1	0	1	0
468	Q9D8E6	Q9D8E6	5	5	5	60S ribosomal protein L4	Rpl4	sp|Q9D8E6|RL4_MOUSE 60S ribosomal protein L4 OS=Mus musculus OX=10090 GN=Rpl4 PE=1 SV=3	1	5	5	5	1	1	1	1	2	1	0	0	2	1	0	0	1	0	2	1	2	3	2	1	1	0	1	0	1	2	1	0	1	0	2	0	0	1	1	2	0
469	Q9D8N0	Q9D8N0	4	4	4	Elongation factor 1-gamma	Eef1g	sp|Q9D8N0|EF1G_MOUSE Elongation factor 1-gamma OS=Mus musculus OX=10090 GN=Eef1g PE=1 SV=3	1	4	4	4	0	1	1	1	2	2	0	2	2	1	1	1	0	2	1	2	0	1	1	1	2	3	1	2	0	0	0	0	0	1	1	1	1	2	1	1	1
470	Q9D8W7	Q9D8W7	1	1	1	OCIA domain-containing protein 2	Ociad2	sp|Q9D8W7|OCAD2_MOUSE OCIA domain-containing protein 2 OS=Mus musculus OX=10090 GN=Ociad2 PE=1 SV=1	1	1	1	1	0	0	0	0	0	0	0	0	0	1	0	1	1	1	0	1	1	1	0	0	0	1	0	1	0	0	0	1	0	0	0	0	0	1	1	0	0
471	Q9D8Y0;Q9D4J1	Q9D8Y0;Q9D4J1	2;1	2;1	2;1	EF-hand domain-containing protein D2;EF-hand domain-containing protein D1	Efhd2;Efhd1	sp|Q9D8Y0|EFHD2_MOUSE EF-hand domain-containing protein D2 OS=Mus musculus OX=10090 GN=Efhd2 PE=1 SV=1;sp|Q9D4J1|EFHD1_MOUSE EF-hand domain-containing protein D1 OS=Mus musculus OX=10090 GN=Efhd1 PE=1 SV=1	2	2	2	2	0	0	0	0	0	0	0	0	0	0	0	0	1	0	0	0	1	0	1	0	0	0	0	0	0	0	0	0	1	0	0	1	2	0	0	1	0
472	Q9DB20	Q9DB20	7	7	7	ATP synthase subunit O, mitochondrial	Atp5o	sp|Q9DB20|ATPO_MOUSE ATP synthase subunit O, mitochondrial OS=Mus musculus OX=10090 GN=Atp5po PE=1 SV=1	1	7	7	7	3	1	3	1	1	2	3	3	2	2	2	4	4	2	2	2	4	3	2	2	3	2	3	2	4	4	3	3	2	3	4	2	4	4	5	4	3
473	Q9DB77	Q9DB77	8	8	8	Cytochrome b-c1 complex subunit 2, mitochondrial	Uqcrc2	sp|Q9DB77|QCR2_MOUSE Cytochrome b-c1 complex subunit 2, mitochondrial OS=Mus musculus OX=10090 GN=Uqcrc2 PE=1 SV=1	1	8	8	8	1	1	2	1	1	3	2	1	1	1	2	1	2	2	2	1	1	1	2	2	2	1	2	2	1	1	2	2	3	1	2	2	0	2	1	2	1
474	Q9DBJ1;O70250	Q9DBJ1	3;1	3;1	3;1	Phosphoglycerate mutase 1	Pgam1	sp|Q9DBJ1|PGAM1_MOUSE Phosphoglycerate mutase 1 OS=Mus musculus OX=10090 GN=Pgam1 PE=1 SV=3	2	3	3	3	0	2	2	1	1	1	2	1	2	1	1	1	1	0	0	0	2	1	1	0	1	0	1	1	0	1	0	0	1	0	2	0	2	1	2	0	0
475	Q9DBP5	Q9DBP5	6	6	6	UMP-CMP kinase	Cmpk1	sp|Q9DBP5|KCY_MOUSE UMP-CMP kinase OS=Mus musculus OX=10090 GN=Cmpk1 PE=1 SV=1	1	6	6	6	3	4	1	3	3	2	4	3	4	4	2	2	4	2	4	3	4	3	3	3	3	2	3	2	4	3	3	3	3	4	3	4	4	3	3	1	3
476	Q9DC70	Q9DC70	1	1	1	NADH dehydrogenase [ubiquinone] iron-sulfur protein 7, mitochondrial	Ndufs7	sp|Q9DC70|NDUS7_MOUSE NADH dehydrogenase [ubiquinone] iron-sulfur protein 7, mitochondrial OS=Mus musculus OX=10090 GN=Ndufs7 PE=1 SV=1	1	1	1	1	1	0	0	0	0	1	1	0	1	0	0	0	0	0	0	0	1	1	1	0	0	0	0	0	0	0	0	1	0	0	1	0	0	0	1	1	0
477	Q9DCD0	Q9DCD0	7	7	7	6-phosphogluconate dehydrogenase, decarboxylating	Pgd	sp|Q9DCD0|6PGD_MOUSE 6-phosphogluconate dehydrogenase, decarboxylating OS=Mus musculus OX=10090 GN=Pgd PE=1 SV=3	1	7	7	7	3	1	1	3	1	3	2	1	2	3	0	1	1	0	2	1	0	2	2	2	2	1	3	1	1	2	4	3	3	1	1	1	3	1	1	2	3
478	Q9DCM0	Q9DCM0	2	2	2	Persulfide dioxygenase ETHE1, mitochondrial	Ethe1	sp|Q9DCM0|ETHE1_MOUSE Persulfide dioxygenase ETHE1, mitochondrial OS=Mus musculus OX=10090 GN=Ethe1 PE=1 SV=2	1	2	2	2	2	0	2	0	0	1	0	1	0	1	0	1	0	1	0	0	0	0	0	0	0	0	0	1	1	1	0	0	0	0	1	0	1	1	0	0	0
479	Q9DCS9	Q9DCS9	2	2	2	NADH dehydrogenase [ubiquinone] 1 beta subcomplex subunit 10	Ndufb10	sp|Q9DCS9|NDUBA_MOUSE NADH dehydrogenase [ubiquinone] 1 beta subcomplex subunit 10 OS=Mus musculus OX=10090 GN=Ndufb10 PE=1 SV=3	1	2	2	2	0	0	0	0	0	0	0	0	0	0	0	0	0	0	0	0	0	0	1	0	1	0	0	0	1	0	1	0	0	0	0	2	0	0	0	0	0
480	Q9DCT2	Q9DCT2	4	4	4	NADH dehydrogenase [ubiquinone] iron-sulfur protein 3, mitochondrial	Ndufs3	sp|Q9DCT2|NDUS3_MOUSE NADH dehydrogenase [ubiquinone] iron-sulfur protein 3, mitochondrial OS=Mus musculus OX=10090 GN=Ndufs3 PE=1 SV=2	1	4	4	4	1	1	1	0	0	1	0	0	0	1	0	1	1	0	1	0	1	1	0	0	0	0	0	0	1	0	1	0	1	0	1	0	0	0	1	0	1
481	Q9DCW4	Q9DCW4	7	7	7	Electron transfer flavoprotein subunit beta	Etfb	sp|Q9DCW4|ETFB_MOUSE Electron transfer flavoprotein subunit beta OS=Mus musculus OX=10090 GN=Etfb PE=1 SV=3	1	7	7	7	2	2	3	4	4	1	3	0	4	1	2	1	3	3	3	2	3	1	0	2	2	1	3	1	0	2	1	1	3	1	3	2	2	1	3	2	4
482	Q9DCX2	Q9DCX2	5	5	5	ATP synthase subunit d, mitochondrial	Atp5h	sp|Q9DCX2|ATP5H_MOUSE ATP synthase subunit d, mitochondrial OS=Mus musculus OX=10090 GN=Atp5pd PE=1 SV=3	1	5	5	5	0	0	1	0	1	1	1	0	1	1	0	0	0	0	0	0	0	0	1	1	0	0	1	0	1	0	0	0	0	0	0	0	0	1	2	1	2
483	Q9EPB4	Q9EPB4	6	6	6	Apoptosis-associated speck-like protein containing a CARD	Pycard	sp|Q9EPB4|ASC_MOUSE Apoptosis-associated speck-like protein containing a CARD OS=Mus musculus OX=10090 GN=Pycard PE=1 SV=1	1	6	6	6	1	0	0	1	1	1	2	0	1	1	2	1	2	1	1	1	2	2	3	2	0	1	3	0	1	1	1	2	3	1	1	2	1	1	2	3	0
484	Q9EQK5	Q9EQK5	8	8	8	Major vault protein	Mvp	sp|Q9EQK5|MVP_MOUSE Major vault protein OS=Mus musculus OX=10090 GN=Mvp PE=1 SV=4	1	8	8	8	0	2	1	0	1	0	1	0	0	1	2	0	0	2	3	0	1	1	0	3	4	0	0	1	3	2	1	1	3	1	1	0	0	0	1	1	1
485	Q9EQU5	Q9EQU5	3	3	3	Protein SET	Set	sp|Q9EQU5|SET_MOUSE Protein SET OS=Mus musculus OX=10090 GN=Set PE=1 SV=1	1	3	3	3	1	2	2	2	2	1	0	2	1	0	0	1	0	1	1	1	0	0	0	1	0	1	1	1	1	2	1	1	1	0	1	1	2	0	1	0	0
486	Q9ERK4	Q9ERK4	1	1	1	Exportin-2	Cse1l	sp|Q9ERK4|XPO2_MOUSE Exportin-2 OS=Mus musculus OX=10090 GN=Cse1l PE=1 SV=1	1	1	1	1	1	1	1	1	1	1	1	1	1	1	1	1	1	1	1	1	1	1	1	1	1	1	1	1	1	1	1	1	1	1	1	1	1	1	1	1	1
487	Q9ERS2	Q9ERS2	3	3	3	NADH dehydrogenase [ubiquinone] 1 alpha subcomplex subunit 13	Ndufa13	sp|Q9ERS2|NDUAD_MOUSE NADH dehydrogenase [ubiquinone] 1 alpha subcomplex subunit 13 OS=Mus musculus OX=10090 GN=Ndufa13 PE=1 SV=3	1	3	3	3	0	1	0	1	1	1	0	0	0	1	0	1	0	0	0	0	1	0	1	1	1	0	1	0	1	0	1	1	0	1	1	0	1	0	1	2	1
488	Q9JI48	Q9JI48	1	1	1	Placenta-specific gene 8 protein	Plac8	sp|Q9JI48|PLAC8_MOUSE Placenta-specific gene 8 protein OS=Mus musculus OX=10090 GN=Plac8 PE=1 SV=1	1	1	1	1	0	0	0	0	0	0	0	0	0	0	1	0	0	0	0	0	0	0	0	0	0	0	0	1	0	0	0	0	1	1	0	0	0	0	0	0	0
489	Q9JII6	Q9JII6	5	5	5	Alcohol dehydrogenase [NADP(+)]	Akr1a1	sp|Q9JII6|AK1A1_MOUSE Aldo-keto reductase family 1 member A1 OS=Mus musculus OX=10090 GN=Akr1a1 PE=1 SV=3	1	5	5	5	2	2	1	3	0	1	3	0	0	3	0	2	2	2	1	1	3	1	1	1	3	2	2	1	2	2	4	1	3	0	1	2	2	1	1	3	3
490	Q9JK88	Q9JK88	2	1	1	Serpin I2	Serpini2	sp|Q9JK88|SPI2_MOUSE Serpin I2 OS=Mus musculus OX=10090 GN=Serpini2 PE=1 SV=1	1	2	1	1	0	0	0	0	1	1	1	1	1	1	0	0	1	0	0	1	1	0	1	1	1	1	1	1	1	1	0	1	1	1	1	0	0	1	1	1	1
491	Q9JKA5	Q9JKA5	3	3	3	Cell surface A33 antigen	Gpa33	sp|Q9JKA5|GPA33_MOUSE Cell surface A33 antigen OS=Mus musculus OX=10090 GN=Gpa33 PE=2 SV=2	1	3	3	3	0	0	2	0	0	0	1	0	0	1	1	0	0	0	1	0	2	0	2	0	1	0	2	1	0	0	0	2	1	2	1	2	0	0	0	0	0
492	Q9JM14	Q9JM14	2	2	2	5(3)-deoxyribonucleotidase, cytosolic type	Nt5c	sp|Q9JM14|NT5C_MOUSE 5(3)-deoxyribonucleotidase, cytosolic type OS=Mus musculus OX=10090 GN=Nt5c PE=1 SV=1	1	2	2	2	0	0	0	0	0	0	0	0	0	0	0	0	0	0	0	0	1	2	1	1	0	0	0	0	0	0	0	0	0	0	1	0	1	1	0	0	0
493	Q9JM76	Q9JM76	2	2	2	Actin-related protein 2/3 complex subunit 3	Arpc3	sp|Q9JM76|ARPC3_MOUSE Actin-related protein 2/3 complex subunit 3 OS=Mus musculus OX=10090 GN=Arpc3 PE=1 SV=3	1	2	2	2	0	0	0	0	0	0	0	0	1	0	0	0	0	1	0	1	0	1	1	1	1	2	2	0	0	1	1	0	1	1	1	1	0	1	0	0	2
494	Q9JMH6	Q9JMH6	2	2	2	Thioredoxin reductase 1, cytoplasmic	Txnrd1	sp|Q9JMH6|TRXR1_MOUSE Thioredoxin reductase 1, cytoplasmic OS=Mus musculus OX=10090 GN=Txnrd1 PE=1 SV=3	1	2	2	2	1	0	0	1	0	0	0	0	0	0	0	0	0	0	0	0	0	0	0	0	0	0	0	0	0	0	0	0	0	1	0	0	0	1	0	0	0
495	Q9NYQ2	Q9NYQ2	2	2	2	Hydroxyacid oxidase 2	Hao2	sp|Q9NYQ2|HAOX2_MOUSE Hydroxyacid oxidase 2 OS=Mus musculus OX=10090 GN=Hao2 PE=1 SV=1	1	2	2	2	0	1	0	0	0	0	1	0	0	1	0	0	0	0	0	0	0	0	0	0	0	0	0	0	0	0	0	0	0	0	0	0	0	0	1	0	0
496	Q9QUM9	Q9QUM9	2	2	2	Proteasome subunit alpha type-6	Psma6	sp|Q9QUM9|PSA6_MOUSE Proteasome subunit alpha type-6 OS=Mus musculus OX=10090 GN=Psma6 PE=1 SV=1	1	2	2	2	1	0	0	0	0	0	0	0	1	1	1	0	0	0	0	2	0	0	0	0	0	1	0	1	0	1	0	0	0	0	0	1	0	0	0	0	0
497	Q9QXT0	Q9QXT0	2	2	2	Protein canopy homolog 2	Cnpy2	sp|Q9QXT0|CNPY2_MOUSE Protein canopy homolog 2 OS=Mus musculus OX=10090 GN=Cnpy2 PE=1 SV=1	1	2	2	2	1	0	0	0	0	0	0	0	0	0	0	0	1	0	0	0	0	0	0	0	0	0	0	0	0	0	0	0	0	0	0	0	0	0	0	0	0
498	Q9R0P3	Q9R0P3	2	2	2	S-formylglutathione hydrolase	Esd	sp|Q9R0P3|ESTD_MOUSE S-formylglutathione hydrolase OS=Mus musculus OX=10090 GN=Esd PE=1 SV=1	1	2	2	2	1	0	0	0	0	1	0	0	0	0	0	0	0	1	0	0	0	0	0	0	0	0	0	1	0	0	0	0	0	1	1	0	1	0	0	0	0
499	Q9R0P5	Q9R0P5	5	5	5	Destrin	Dstn	sp|Q9R0P5|DEST_MOUSE Destrin OS=Mus musculus OX=10090 GN=Dstn PE=1 SV=3	1	5	5	5	2	1	3	4	2	1	1	3	3	4	4	3	3	1	3	3	2	3	4	4	1	4	4	3	2	2	4	2	2	1	3	2	2	3	1	4	3
500	Q9R100	Q9R100	6	6	6	Cadherin-17	Cdh17	sp|Q9R100|CAD17_MOUSE Cadherin-17 OS=Mus musculus OX=10090 GN=Cdh17 PE=1 SV=1	1	6	6	6	2	2	1	3	2	1	2	2	2	3	2	2	3	2	1	2	2	2	3	2	1	2	2	2	3	4	2	4	2	3	2	3	4	2	2	1	3
501	Q9R112	Q9R112	11	11	11	Sulfide:quinone oxidoreductase, mitochondrial	Sqrdl	sp|Q9R112|SQOR_MOUSE Sulfide:quinone oxidoreductase, mitochondrial OS=Mus musculus OX=10090 GN=Sqor PE=1 SV=3	1	11	11	11	6	6	5	6	4	2	7	3	3	5	5	3	5	6	5	4	6	3	2	6	6	7	6	5	5	8	5	4	5	8	5	7	5	4	7	4	1
502	Q9R1P3	Q9R1P3	1	1	1	Proteasome subunit beta type-2	Psmb2	sp|Q9R1P3|PSB2_MOUSE Proteasome subunit beta type-2 OS=Mus musculus OX=10090 GN=Psmb2 PE=1 SV=1	1	1	1	1	0	1	0	0	1	0	0	1	0	1	0	0	0	0	1	0	0	0	1	0	0	0	0	0	0	0	0	0	1	0	1	1	1	0	1	0	1
503	Q9WTP6	Q9WTP6	2	2	2	Adenylate kinase 2, mitochondrial;Adenylate kinase 2, mitochondrial, N-terminally processed	Ak2	sp|Q9WTP6|KAD2_MOUSE Adenylate kinase 2, mitochondrial OS=Mus musculus OX=10090 GN=Ak2 PE=1 SV=5	1	2	2	2	1	0	2	0	0	0	1	1	0	0	0	0	1	0	0	0	0	0	0	0	0	0	0	1	0	0	0	0	0	0	0	0	0	0	0	1	0
504	Q9WTP7	Q9WTP7	1	1	1	GTP:AMP phosphotransferase AK3, mitochondrial	Ak3	sp|Q9WTP7|KAD3_MOUSE GTP:AMP phosphotransferase AK3, mitochondrial OS=Mus musculus OX=10090 GN=Ak3 PE=1 SV=3	1	1	1	1	0	0	1	0	0	1	1	0	0	0	0	0	0	0	0	0	0	1	0	0	0	0	0	1	0	0	0	0	0	0	0	0	0	0	1	0	0
505	Q9WUK2	Q9WUK2	1	1	1	Eukaryotic translation initiation factor 4H	Eif4h	sp|Q9WUK2|IF4H_MOUSE Eukaryotic translation initiation factor 4H OS=Mus musculus OX=10090 GN=Eif4h PE=1 SV=3	1	1	1	1	0	1	0	0	0	1	0	1	0	0	0	0	0	1	0	1	0	0	0	0	0	1	0	1	1	0	0	1	0	0	0	1	0	0	1	1	0
506	Q9WUM5	Q9WUM5	2	2	2	Succinyl-CoA ligase [ADP/GDP-forming] subunit alpha, mitochondrial	Suclg1	sp|Q9WUM5|SUCA_MOUSE Succinate--CoA ligase [ADP/GDP-forming] subunit alpha, mitochondrial OS=Mus musculus OX=10090 GN=Suclg1 PE=1 SV=4	1	2	2	2	0	1	0	0	0	0	1	0	0	0	0	0	0	0	0	0	0	0	0	0	0	0	0	0	0	0	0	0	1	0	0	0	0	0	1	0	0
507	Q9WV54	Q9WV54	2	2	2	Acid ceramidase;Acid ceramidase subunit alpha;Acid ceramidase subunit beta	Asah1	sp|Q9WV54|ASAH1_MOUSE Acid ceramidase OS=Mus musculus OX=10090 GN=Asah1 PE=1 SV=1	1	2	2	2	0	0	0	0	0	0	0	0	0	0	0	0	0	0	0	0	0	0	0	1	0	0	0	0	0	0	0	0	0	1	0	0	0	0	0	0	0
508	Q9WVA4	Q9WVA4	8	8	8	Transgelin-2	Tagln2	sp|Q9WVA4|TAGL2_MOUSE Transgelin-2 OS=Mus musculus OX=10090 GN=Tagln2 PE=1 SV=4	1	8	8	8	4	3	4	3	3	4	2	2	4	2	4	2	1	2	4	3	4	3	2	5	2	3	3	2	2	4	4	1	3	3	3	3	5	2	3	1	3
509	Q9WVE8	Q9WVE8	2	2	2	Protein kinase C and casein kinase substrate in neurons protein 2	Pacsin2	sp|Q9WVE8|PACN2_MOUSE Protein kinase C and casein kinase substrate in neurons protein 2 OS=Mus musculus OX=10090 GN=Pacsin2 PE=1 SV=1	1	2	2	2	0	0	0	0	0	0	0	0	0	0	0	0	0	1	0	0	0	0	0	0	0	0	0	0	0	0	0	0	0	0	0	1	0	0	0	0	0
510	Q9Z0L8	Q9Z0L8	2	2	2	Gamma-glutamyl hydrolase	Ggh	sp|Q9Z0L8|GGH_MOUSE Gamma-glutamyl hydrolase OS=Mus musculus OX=10090 GN=Ggh PE=1 SV=2	1	2	2	2	0	0	0	0	0	0	0	1	1	0	0	0	0	0	0	0	0	0	0	1	0	0	0	0	0	0	0	0	0	0	0	0	0	0	0	0	0
511	Q9Z1Q5	Q9Z1Q5	3	3	3	Chloride intracellular channel protein 1	Clic1	sp|Q9Z1Q5|CLIC1_MOUSE Chloride intracellular channel protein 1 OS=Mus musculus OX=10090 GN=Clic1 PE=1 SV=3	1	3	3	3	1	2	1	1	2	0	1	0	1	1	0	1	2	0	1	1	0	0	0	2	2	1	1	1	1	1	1	2	2	2	0	1	1	0	1	1	0
512	Q9Z204	Q9Z204	2	2	2	Heterogeneous nuclear ribonucleoproteins C1/C2	Hnrnpc	sp|Q9Z204|HNRPC_MOUSE Heterogeneous nuclear ribonucleoproteins C1/C2 OS=Mus musculus OX=10090 GN=Hnrnpc PE=1 SV=1	1	2	2	2	1	0	0	0	1	0	0	1	1	1	0	0	0	0	0	0	0	0	0	1	1	0	1	1	1	0	0	1	0	1	1	1	0	1	1	1	0
513	Q9Z2I8	Q9Z2I8	8	8	8	Succinyl-CoA ligase [GDP-forming] subunit beta, mitochondrial	Suclg2	sp|Q9Z2I8|SUCB2_MOUSE Succinate--CoA ligase [GDP-forming] subunit beta, mitochondrial OS=Mus musculus OX=10090 GN=Suclg2 PE=1 SV=3	1	8	8	8	3	5	3	4	4	2	2	4	3	1	5	2	2	3	4	4	3	5	3	4	2	2	3	3	6	5	3	5	2	3	3	3	2	2	3	3	2
514	Q9Z2M7;O35621	Q9Z2M7	4;1	4;1	4;1	Phosphomannomutase 2	Pmm2	sp|Q9Z2M7|PMM2_MOUSE Phosphomannomutase 2 OS=Mus musculus OX=10090 GN=Pmm2 PE=1 SV=1	2	4	4	4	0	1	1	0	1	0	1	0	0	1	0	1	0	0	0	1	1	0	0	3	0	0	1	2	1	1	0	0	0	0	0	1	0	1	0	1	1
515	Q9Z2U0;Q9CWH6	Q9Z2U0;Q9CWH6	2;1	2;1	2;1	Proteasome subunit alpha type-7;Proteasome subunit alpha type-7-like	Psma7;Psma8	sp|Q9Z2U0|PSA7_MOUSE Proteasome subunit alpha type-7 OS=Mus musculus OX=10090 GN=Psma7 PE=1 SV=1;sp|Q9CWH6|PSMA8_MOUSE Proteasome subunit alpha type-8 OS=Mus musculus OX=10090 GN=Psma8 PE=1 SV=1	2	2	2	2	0	0	0	0	1	0	0	0	1	0	0	0	0	0	0	0	0	0	0	0	0	0	0	0	0	0	0	0	1	1	0	1	1	0	1	0	0
516	Q9Z2X1;O35737;P70333	Q9Z2X1;O35737	3;2;1	3;2;1	3;2;1	Heterogeneous nuclear ribonucleoprotein F;Heterogeneous nuclear ribonucleoprotein F, N-terminally processed;Heterogeneous nuclear ribonucleoprotein H;Heterogeneous nuclear ribonucleoprotein H, N-terminally processed	Hnrnpf;Hnrnph1	sp|Q9Z2X1|HNRPF_MOUSE Heterogeneous nuclear ribonucleoprotein F OS=Mus musculus OX=10090 GN=Hnrnpf PE=1 SV=3;sp|O35737|HNRH1_MOUSE Heterogeneous nuclear ribonucleoprotein H OS=Mus musculus OX=10090 GN=Hnrnph1 PE=1 SV=3	3	3	3	3	0	0	0	0	1	0	1	0	0	1	0	0	2	0	0	0	0	0	1	0	1	1	0	1	1	0	1	1	0	0	1	1	1	0	0	0	0
[truncated: 417 more columns]
