# Supplementary figures and images for: Rab7-dependent regulation of goblet cell protein CLCA1 modulates gastrointestinal homeostasis
Source: eLife journal article supplement (doi:10.7554/elife.89776), 2023-11-01

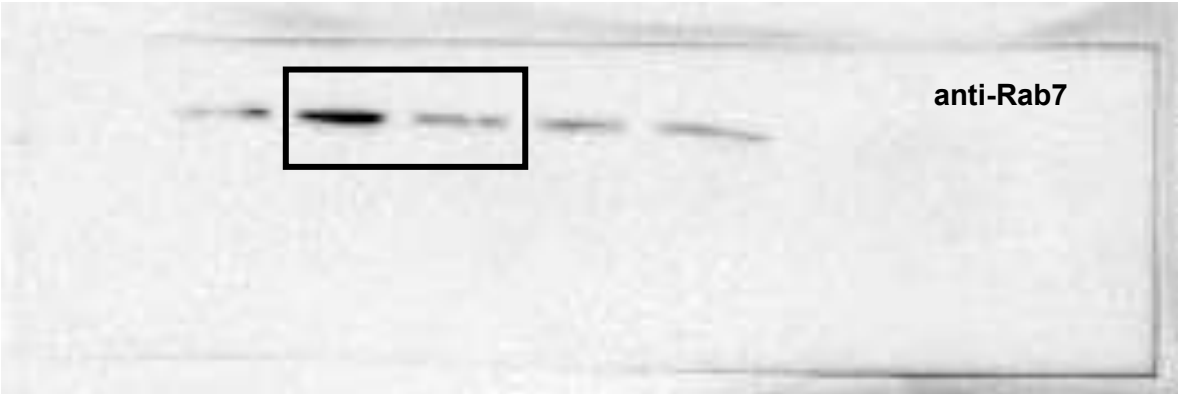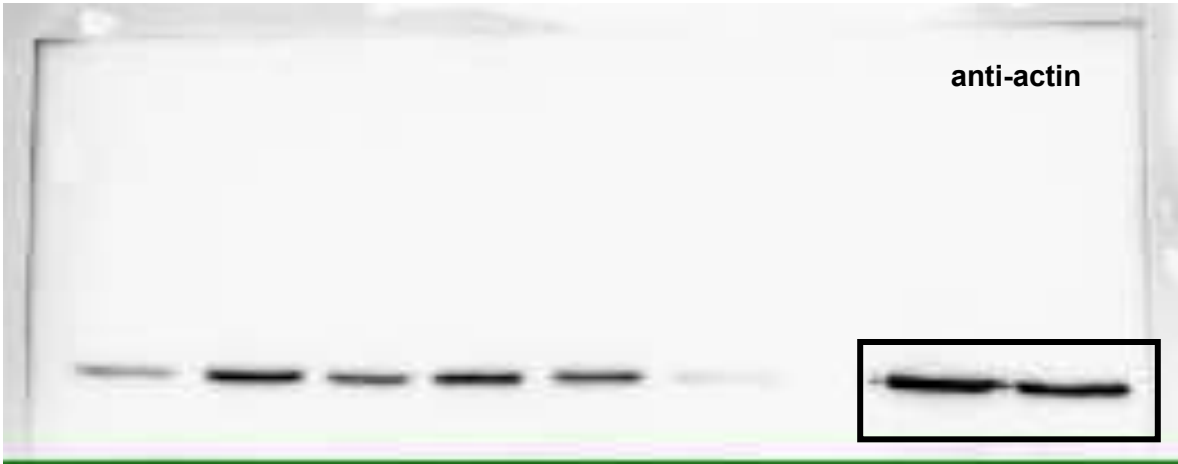

Supplement: fig1-data1 [file elife-89776-fig1-data1-v1.zip]

anti-Rab7

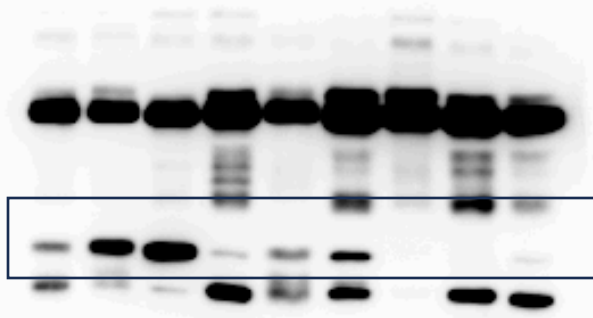

anti-GAPDH

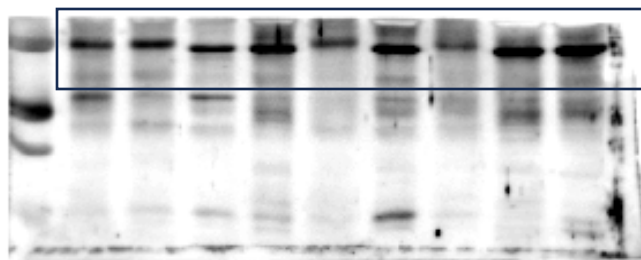

Supplement: fig1-data1 [file elife-89776-fig1-data1-v1.zip]

anti-Rab7

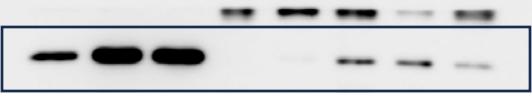

anti-GAPDH

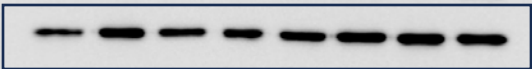

Supplement: fig1-data1 [file elife-89776-fig1-data1-v1.zip]

**anti-Rab7**

**Whole tissue lysate**

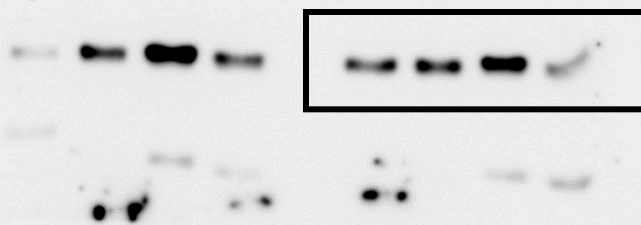

**anti-actin**

**Whole tissue lysate**

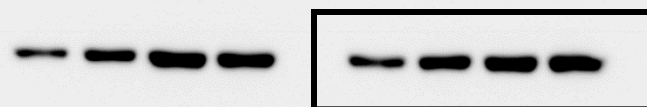

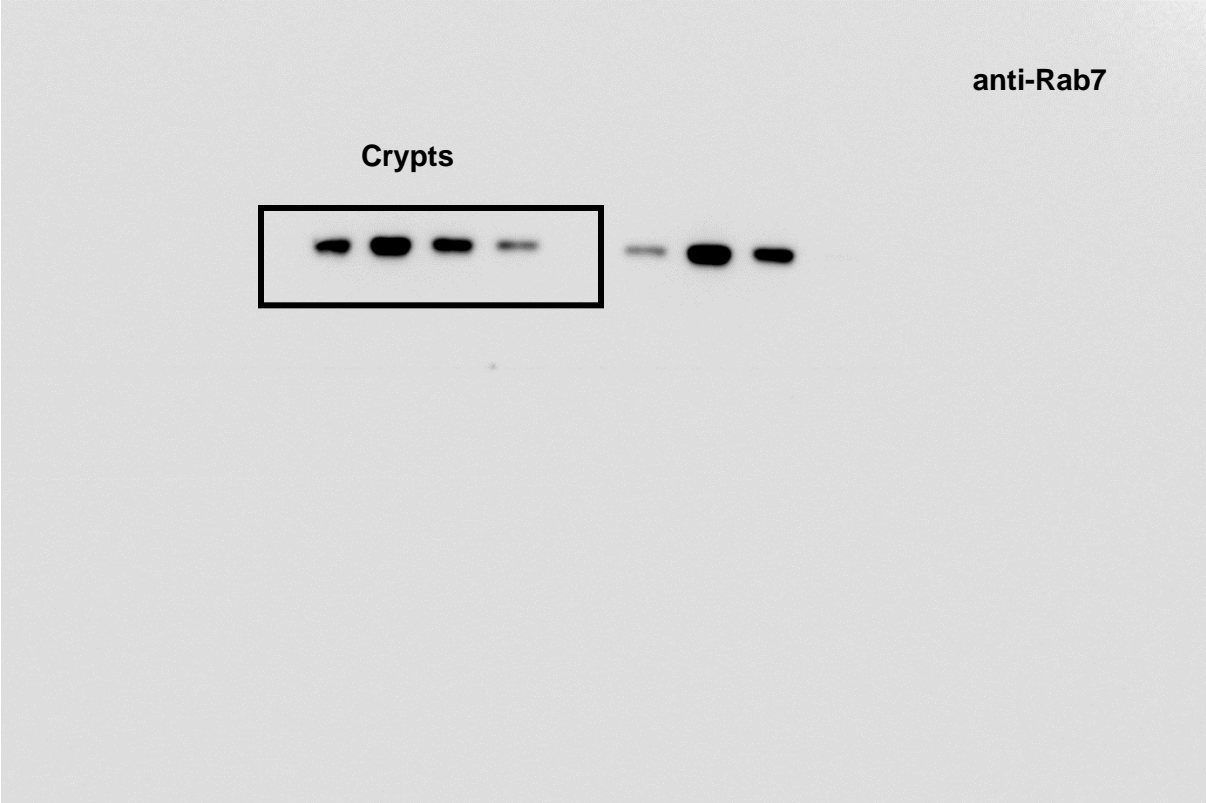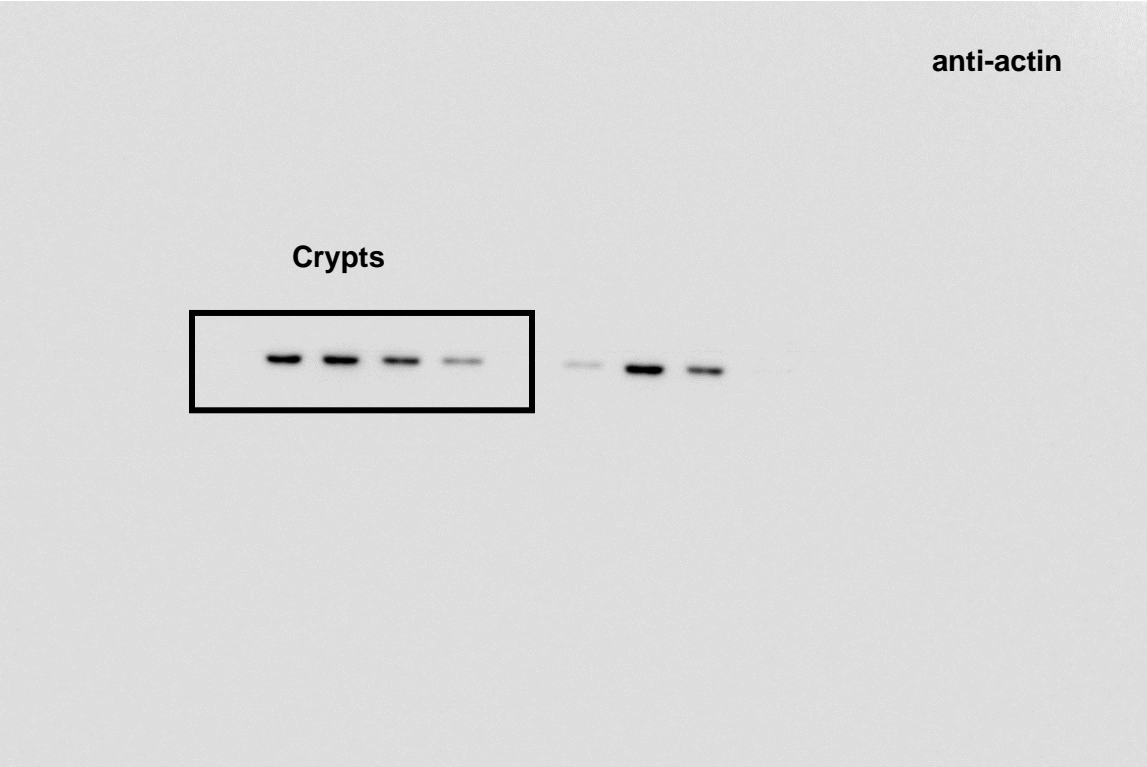

Supplement: fig1-figsupp1-data1 [file elife-89776-fig1-figsupp1-data1-v1.zip]

**anti-Rab7**

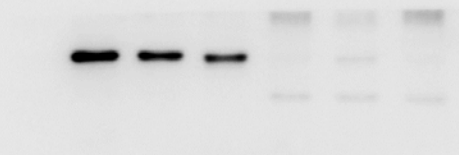

**anti-GAPDH**

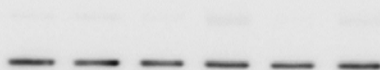

Supplement: fig1-figsupp1-data1 [file elife-89776-fig1-figsupp1-data1-v1.zip]

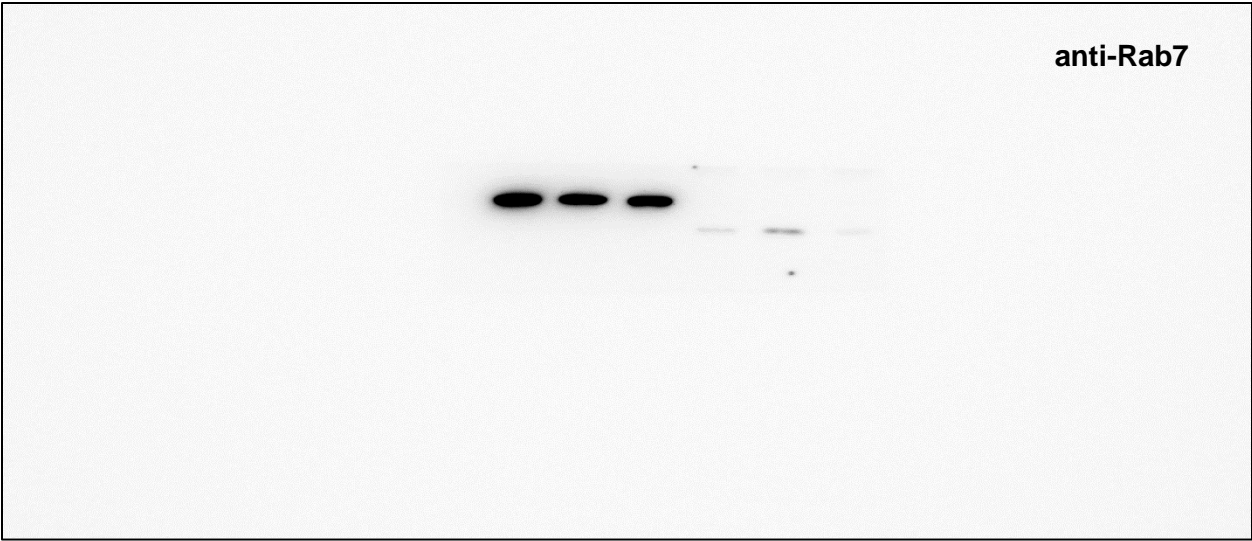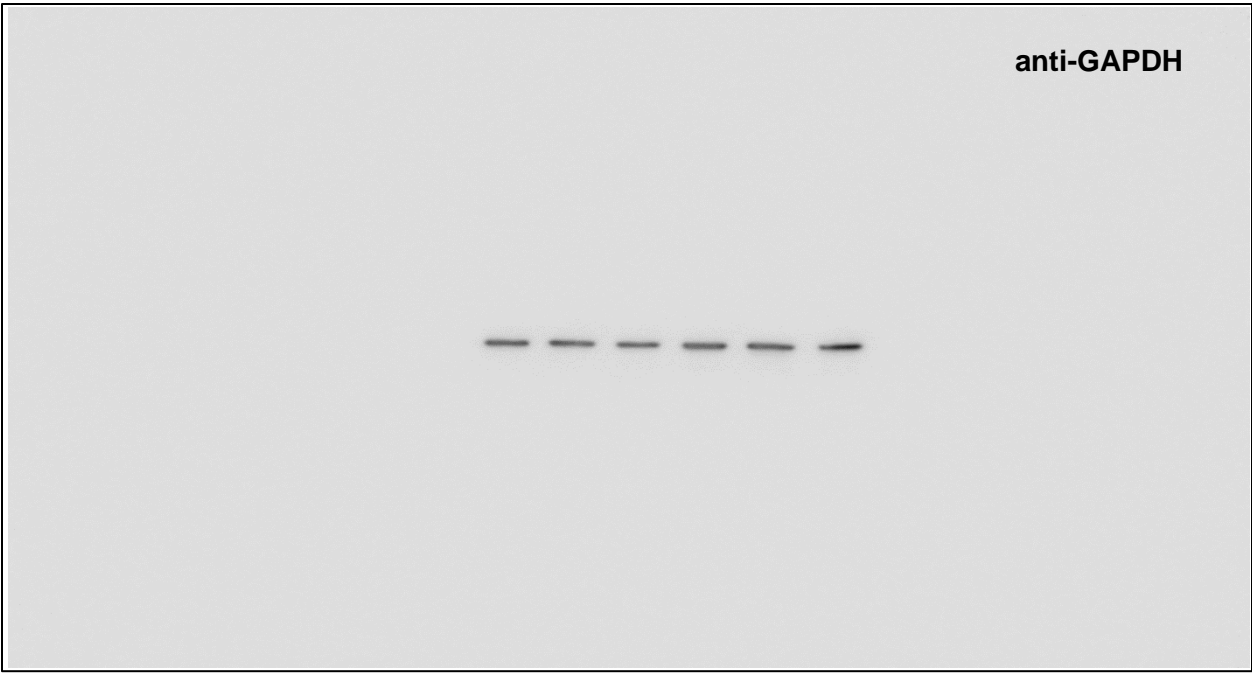

Supplement: fig1-figsupp1-data1 [file elife-89776-fig1-figsupp1-data1-v1.zip]

**anti-Rab7**

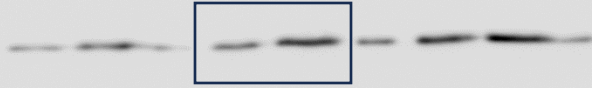

**anti-actin**

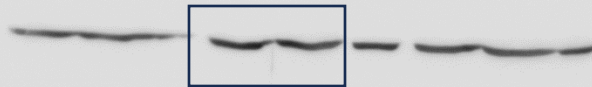

Supplement: fig2-figsupp1-data1 [file elife-89776-fig2-figsupp1-data1-v1.zip]

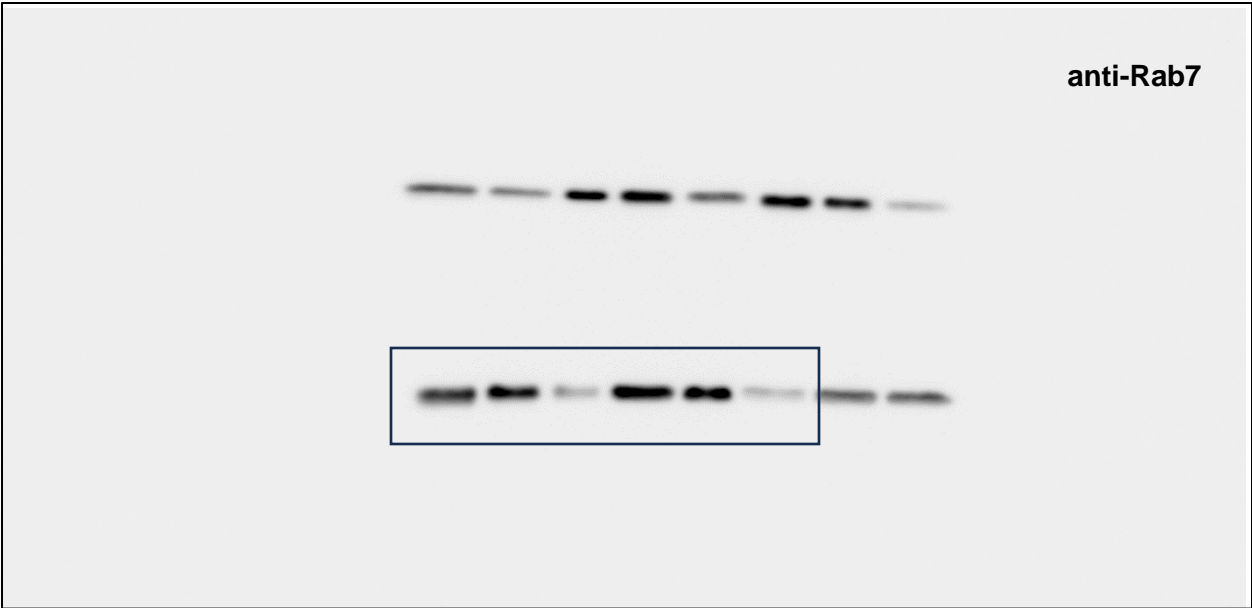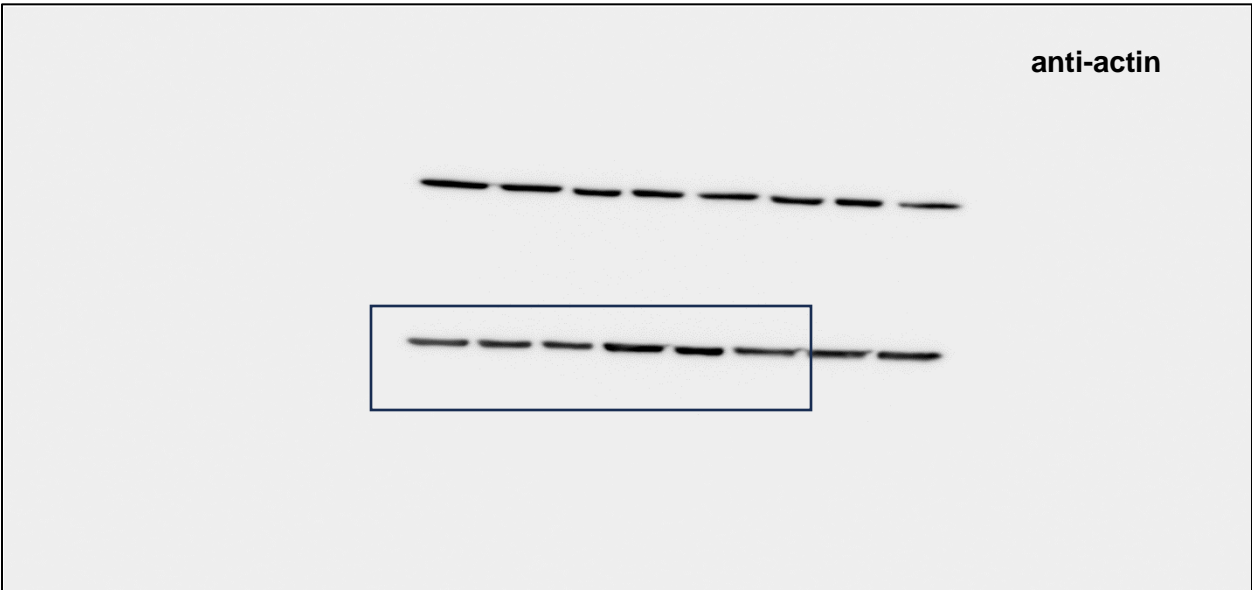

Supplement: fig3-data1 [file elife-89776-fig3-data1-v1.zip]

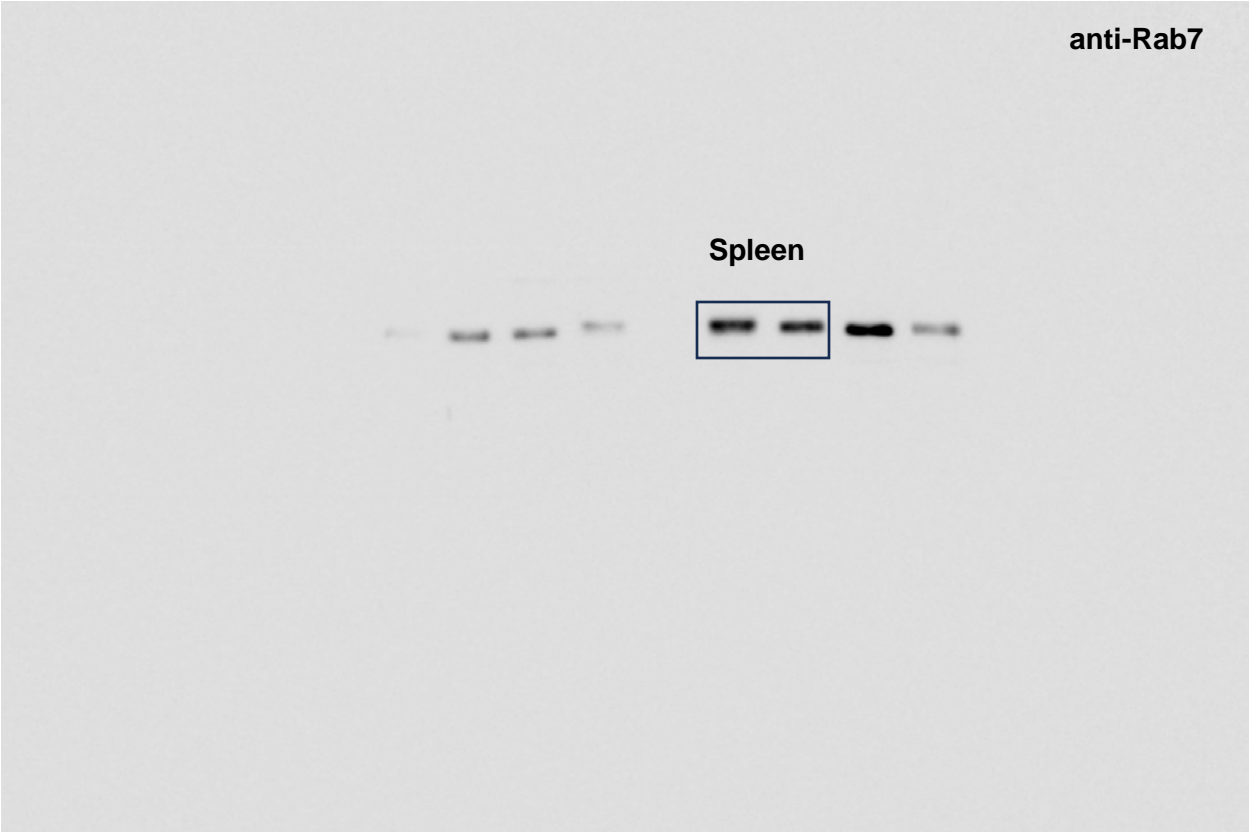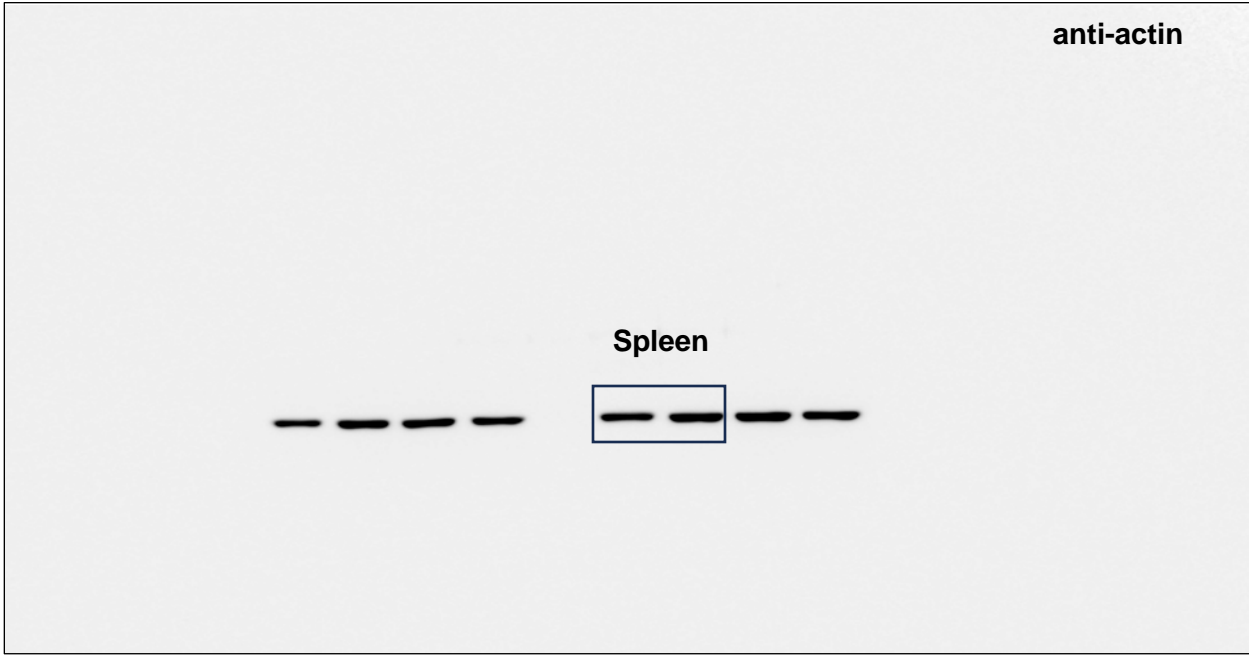

**anti-Rab7**

**MLN**

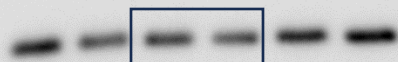

**anti-actin**

**MLN**

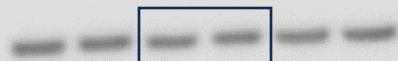

anti-Rab7

Liver

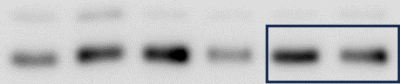

anti-actin

Liver

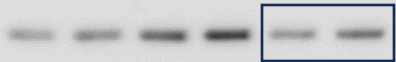

Supplement: fig3-figsupp1-data1 [file elife-89776-fig3-figsupp1-data1-v1.zip]

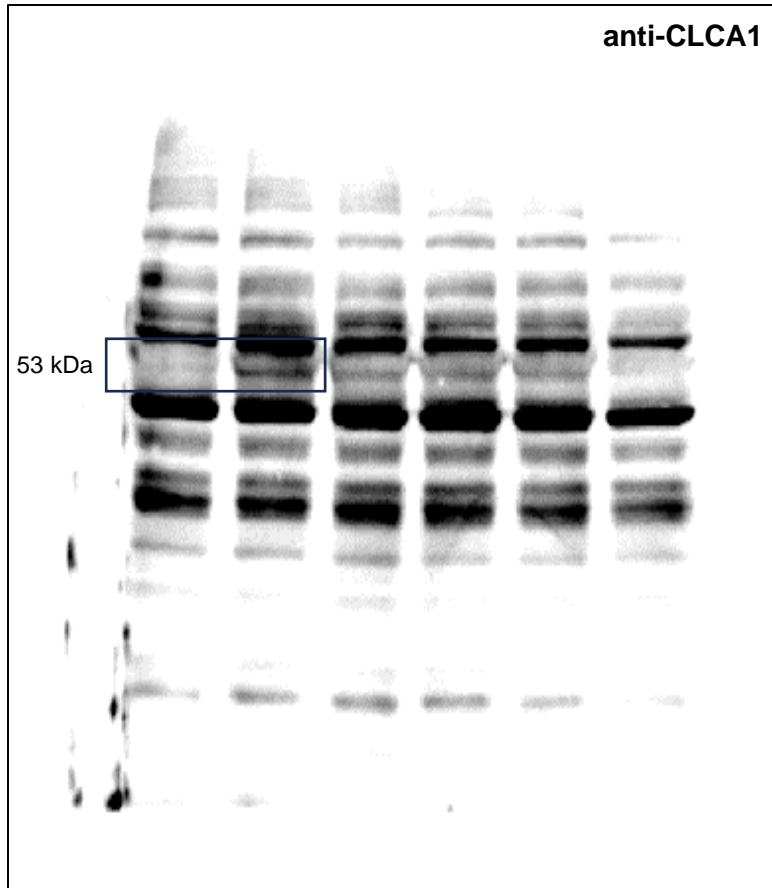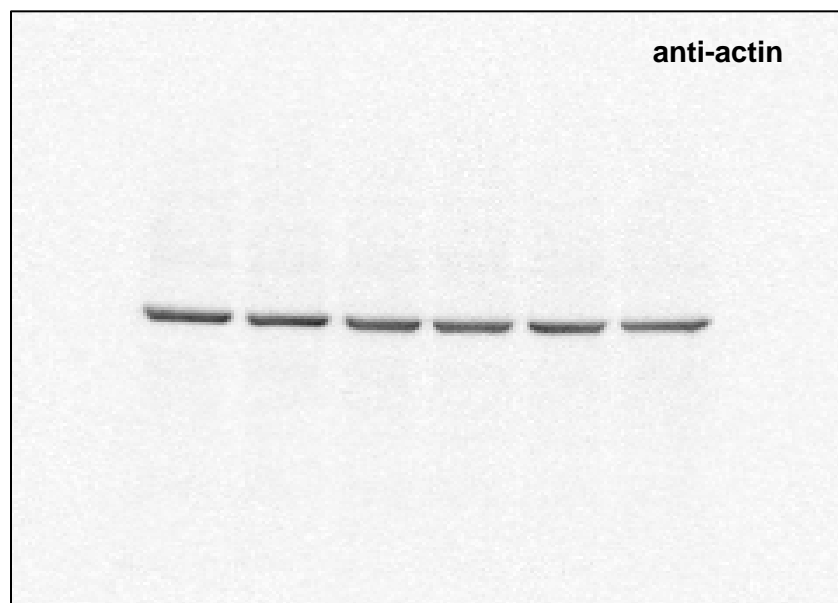

Supplement: fig7-data1 [file elife-89776-fig7-data1-v1.zip]

anti-CLCA1

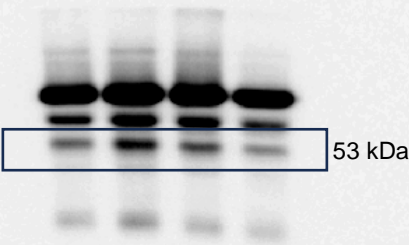

Supplement: fig7-data1 [file elife-89776-fig7-data1-v1.zip]

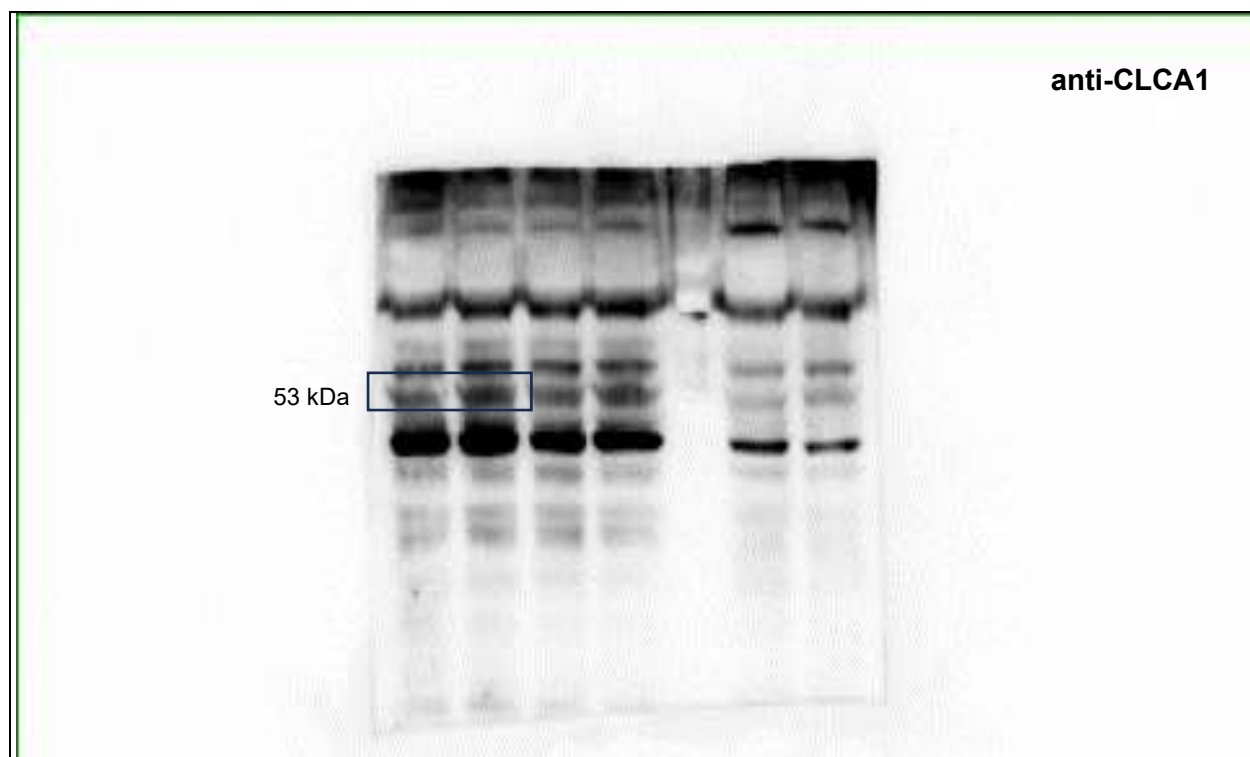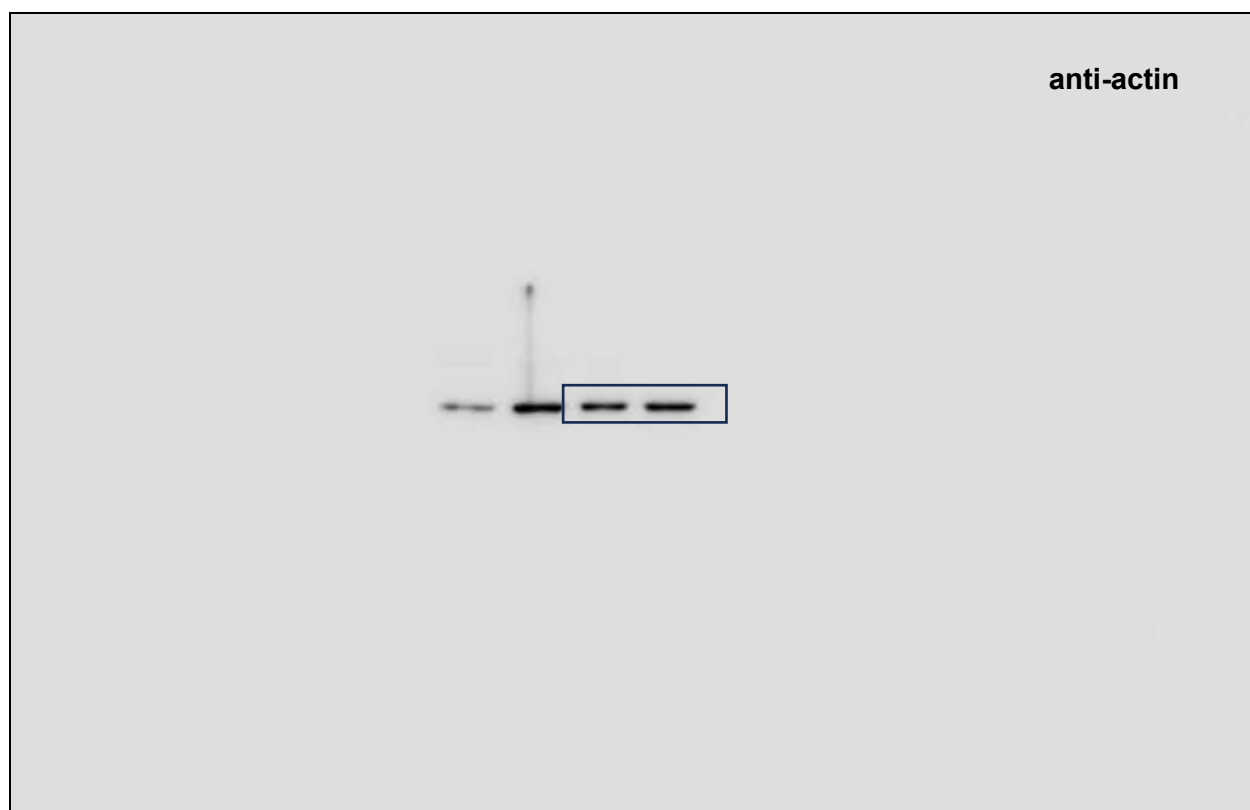

Supplement: fig7-data1 [file elife-89776-fig7-data1-v1.zip]

**anti-CLCA1**

**Tissue**

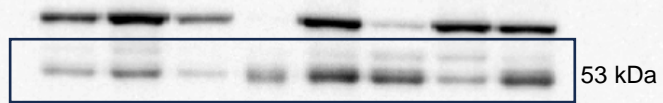

**anti-CLCA1**

**Mucus**

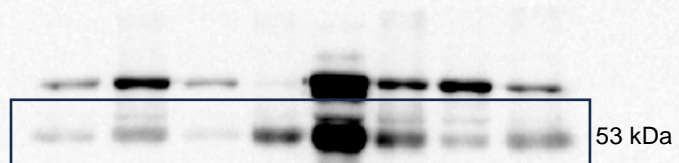

Supplement: fig7-data1 [file elife-89776-fig7-data1-v1.zip]

anti-CLCA1

53 kDa

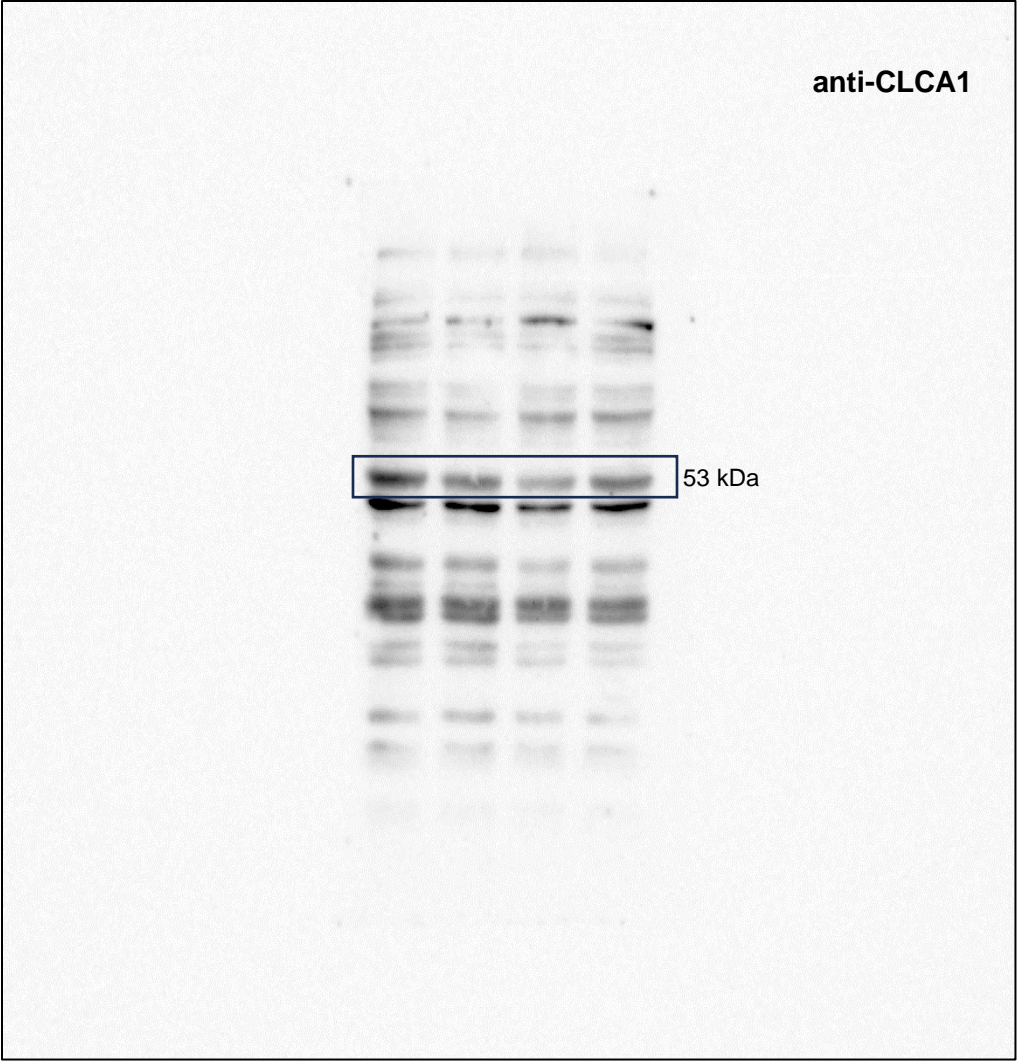

**anti-actin**

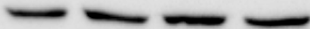

Supplement: fig7-data1 [file elife-89776-fig7-data1-v1.zip]

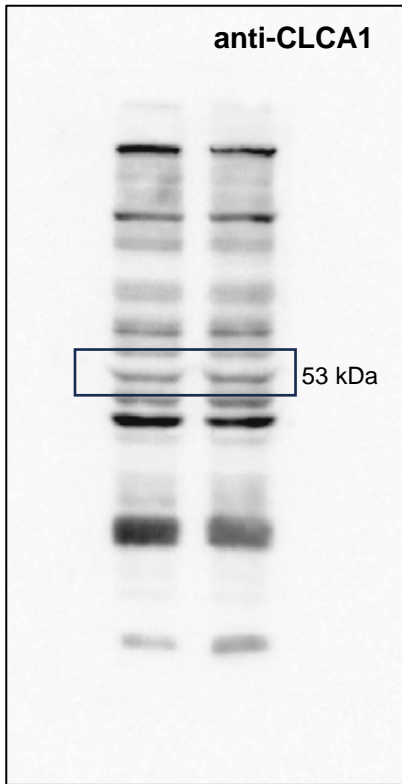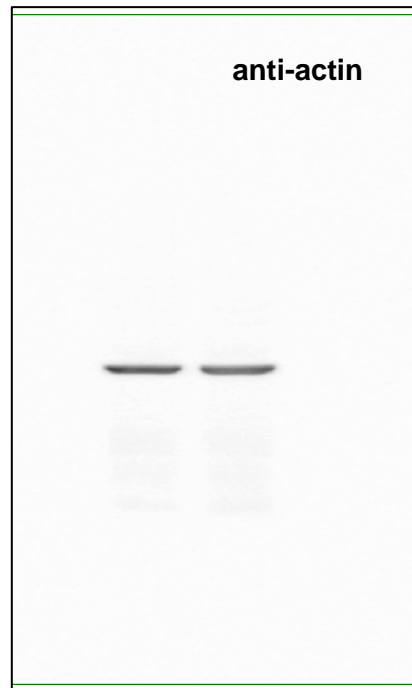

Supplement: fig7-figsupp1-data1 [file elife-89776-fig7-figsupp1-data1-v1.zip]
